# Supplementary material for: Use of video surveillance to measure the influences of habitat management and landscape composition on pollinator visitation and pollen deposition in pumpkin (Cucurbita pepo) agroecosystems
Source: PeerJ. 2015 Nov 5;3:e1342. doi: 10.7717/peerj.1342 (PMC4647596; doi:10.7717/peerj.1342)
Supplement: Supplemental Information 1 [file peerj-03-1342-s001.xlsx]

## Sheet: key to abbrevs and headings
	Heading prefix abbreviations				Heading suffix abbreviations				Treatment abbreviations
	vid-	video footage			-sb	squash bee			sex	flower sex
	poll-	pollination experiment			-hb	honey bee			sex = male	male flower
	gis-	geographic information systems data			-bb	bumble bee			sex = female	female flower
	avg-	average			-other	other insects			sitetrt	site treatment
	min-	minutes			-para	adults parasitzed			sitetrt = c	control
	frame in	frame when bee enters shot			-pred	eggs predated			sitetrt = a	alyssum
	frame out	fram when bee leaves shot							cam	camera number 1-4
	time in H, M, S	hour, minute, second of bee enter							vidtrt	time of morning
	time out H, M, S	hour, minute, second of bee leave							vid/polltrt = 1	6-8AM
	frames	number of elapsed frames recorded							vid/polltrt = 2	8-10AM
	maxframe	number of frame in one clip leading to the next							vid/polltrt = 3	10-12PM
	/16fps=s	seconds elapsed calculated from frames
	/60=min	minutes elapsed calculated from seconds
	insect	insect that enters shot
	insect2	non SB, HB, BB grouped as "OTHER"
	HBtime	elapsed time of each HB visit
	SBtime	elapsed time of each SB visit
	BBtime	elapsed time of each BB visit
	OTHERtime	elapsed time of each OTHER visit
	#start	adults collected
	#para	adults parasitized
	start	eggs deployed
	end	eggs recovered
	diff	difference
	pct-	percent

## Sheet: 2011 LS and pollinatorvids
site	sex	all	hb	bb	sb	other	avgminhb	avgminbb	avgminsb	avgminother	pctfield1500	pctforage1500	pctfruitveg1500	pctforest1500	pctgrassland1500	pcturban1500	pctturf1500	pctfield1000	pctforage1000	pctfruitveg1000	pctforest1000	pctgrassland1000	pcturban1000	pctturf1000	pctfield500	pctforage500	pctfruitveg500	pctforest500	pctgrassland500	pcturban500	pctturf500
BA	2	8	0	0	8	0	0	0	2.1974	0	41.2555	5.0688	7.66997	15.7269	7.5705	6.882	6.2746	28.3133	5.8634	17.2198	16.7993	8.6928	9.3638	5.6097	29.2243	3.051	28.4905	21.0031	7.974	5.65	2.5287
BA	2	38	34	2	1	1	2.20104	0.508854	3.17917	0.108333	41.2555	5.0688	7.66997	15.7269	7.5705	6.882	6.2746	28.3133	5.8634	17.2198	16.7993	8.6928	9.3638	5.6097	29.2243	3.051	28.4905	21.0031	7.974	5.65	2.5287
BA	2	77	76	0	1	0	2.83671	0	0.0270833	0	41.2555	5.0688	7.66997	15.7269	7.5705	6.882	6.2746	28.3133	5.8634	17.2198	16.7993	8.6928	9.3638	5.6097	29.2243	3.051	28.4905	21.0031	7.974	5.65	2.5287
BA	1	5	0	0	5	0	0	0	3.97	0	41.2555	5.0688	7.66997	15.7269	7.5705	6.882	6.2746	28.3133	5.8634	17.2198	16.7993	8.6928	9.3638	5.6097	29.2243	3.051	28.4905	21.0031	7.974	5.65	2.5287
BA	1	3	0	0	3	0	0	0	0.253819	0	41.2555	5.0688	7.66997	15.7269	7.5705	6.882	6.2746	28.3133	5.8634	17.2198	16.7993	8.6928	9.3638	5.6097	29.2243	3.051	28.4905	21.0031	7.974	5.65	2.5287
BA	1	77	69	6	2	0	0.441878	1.02812	0.45625	0	41.2555	5.0688	7.66997	15.7269	7.5705	6.882	6.2746	28.3133	5.8634	17.2198	16.7993	8.6928	9.3638	5.6097	29.2243	3.051	28.4905	21.0031	7.974	5.65	2.5287
FW	2	68	40	2	26	0	1.4326	0.500521	0.0860577	0	41.0211	5.2859	0.44248	11.5864	17.0939	6.5847	2.7243	37.5512	8.9046	0.9956	7.9193	20.9331	10.2708	2.21875	19.5337	6.0853	2.3718	10.3248	36.981	19.6256	1.5897
FW	2	126	113	3	10	0	1.72011	0.1375	0.1025	0	41.0211	5.2859	0.44248	11.5864	17.0939	6.5847	2.7243	37.5512	8.9046	0.9956	7.9193	20.9331	10.2708	2.21875	19.5337	6.0853	2.3718	10.3248	36.981	19.6256	1.5897
FW	2	45	39	4	1	1	1.13515	0.252344	0.0583333	3.73438	41.0211	5.2859	0.44248	11.5864	17.0939	6.5847	2.7243	37.5512	8.9046	0.9956	7.9193	20.9331	10.2708	2.21875	19.5337	6.0853	2.3718	10.3248	36.981	19.6256	1.5897
FW	1	47	33	1	13	0	0.427304	0.186458	0.455369	0	41.0211	5.2859	0.44248	11.5864	17.0939	6.5847	2.7243	37.5512	8.9046	0.9956	7.9193	20.9331	10.2708	2.21875	19.5337	6.0853	2.3718	10.3248	36.981	19.6256	1.5897
FW	1	103	80	8	14	1	0.525977	0.183073	0.230729	0.18125	41.0211	5.2859	0.44248	11.5864	17.0939	6.5847	2.7243	37.5512	8.9046	0.9956	7.9193	20.9331	10.2708	2.21875	19.5337	6.0853	2.3718	10.3248	36.981	19.6256	1.5897
FW	1	36	27	6	1	2	0.744483	0.125694	0.015625	4.27031	41.0211	5.2859	0.44248	11.5864	17.0939	6.5847	2.7243	37.5512	8.9046	0.9956	7.9193	20.9331	10.2708	2.21875	19.5337	6.0853	2.3718	10.3248	36.981	19.6256	1.5897
JB	2	32	18	11	3	0	2.89277	0.862973	0.314236	0	59.3235	0	3.61883	7.5589	7.9293	5.2445	10.3869	71.8306	0	8.1427	4.8299	4.6123	3.1468	5.34781	72.2194	0	21.3525	1.6168	0.0608	0	0
JB	2	104	86	8	8	2	1.7988	0.177474	0.0888021	0.684375	59.3235	0	3.61883	7.5589	7.9293	5.2445	10.3869	71.8306	0	8.1427	4.8299	4.6123	3.1468	5.34781	72.2194	0	21.3525	1.6168	0.0608	0	0
JB	2	29	23	4	2	0	0.995516	0.219792	0.276562	0	59.3235	0	3.61883	7.5589	7.9293	5.2445	10.3869	71.8306	0	8.1427	4.8299	4.6123	3.1468	5.34781	72.2194	0	21.3525	1.6168	0.0608	0	0
JB	1	5	1	1	3	0	0.0697917	0.313542	0.354514	0	59.3235	0	3.61883	7.5589	7.9293	5.2445	10.3869	71.8306	0	8.1427	4.8299	4.6123	3.1468	5.34781	72.2194	0	21.3525	1.6168	0.0608	0	0
JB	1	13	6	3	4	0	0.159896	0.167361	0.117448	0	59.3235	0	3.61883	7.5589	7.9293	5.2445	10.3869	71.8306	0	8.1427	4.8299	4.6123	3.1468	5.34781	72.2194	0	21.3525	1.6168	0.0608	0	0
JB	1	5	3	1	1	0	0.171181	0.111458	0.297917	0	59.3235	0	3.61883	7.5589	7.9293	5.2445	10.3869	71.8306	0	8.1427	4.8299	4.6123	3.1468	5.34781	72.2194	0	21.3525	1.6168	0.0608	0	0
KG	2	62	21	17	24	0	2.03953	1.68891	0.926302	0	30.8802	3.9384	3.73433	18.8311	15.8494	11.4232	6.4153	32.4866	4.6461	7.5984	13.6856	18.9425	8.4722	7.78832	55.7656	0.6391	3.711	5.7151	20.7782	5.0854	1.5471
KG	2	146	86	51	9	0	2.95004	0.462296	0.163657	0	30.8802	3.9384	3.73433	18.8311	15.8494	11.4232	6.4153	32.4866	4.6461	7.5984	13.6856	18.9425	8.4722	7.78832	55.7656	0.6391	3.711	5.7151	20.7782	5.0854	1.5471
KG	2	129	54	45	30	0	1.34657	0.26713	0.13309	0	30.8802	3.9384	3.73433	18.8311	15.8494	11.4232	6.4153	32.4866	4.6461	7.5984	13.6856	18.9425	8.4722	7.78832	55.7656	0.6391	3.711	5.7151	20.7782	5.0854	1.5471
KG	1	37	0	3	34	0	0	1.03542	0.46299	0	30.8802	3.9384	3.73433	18.8311	15.8494	11.4232	6.4153	32.4866	4.6461	7.5984	13.6856	18.9425	8.4722	7.78832	55.7656	0.6391	3.711	5.7151	20.7782	5.0854	1.5471
KG	1	59	1	31	27	0	0.0854167	0.71287	0.548804	0	30.8802	3.9384	3.73433	18.8311	15.8494	11.4232	6.4153	32.4866	4.6461	7.5984	13.6856	18.9425	8.4722	7.78832	55.7656	0.6391	3.711	5.7151	20.7782	5.0854	1.5471
KG	1	64	1	22	40	1	0.378125	0.416335	1.19083	0.301042	30.8802	3.9384	3.73433	18.8311	15.8494	11.4232	6.4153	32.4866	4.6461	7.5984	13.6856	18.9425	8.4722	7.78832	55.7656	0.6391	3.711	5.7151	20.7782	5.0854	1.5471
RC	2	53	8	0	45	0	2.01484	0	0.943958	0	20.4633	2.0867	2.25475	33.376	8.6755	6.2059	14.6015	18.1023	2.5486	4.2218	31.4599	11.4246	5.9511	16.7963	8.427	0	9.819	36.1858	11.0197	7.6474	10.9364
RC	2	109	74	4	31	0	2.23511	0.235937	0.483132	0	20.4633	2.0867	2.25475	33.376	8.6755	6.2059	14.6015	18.1023	2.5486	4.2218	31.4599	11.4246	5.9511	16.7963	8.427	0	9.819	36.1858	11.0197	7.6474	10.9364
RC	2	100	50	4	46	0	1.55744	0.757031	0.765104	0	20.4633	2.0867	2.25475	33.376	8.6755	6.2059	14.6015	18.1023	2.5486	4.2218	31.4599	11.4246	5.9511	16.7963	8.427	0	9.819	36.1858	11.0197	7.6474	10.9364
RC	1	22	1	0	21	0	0.0364583	0	0.601637	0	20.4633	2.0867	2.25475	33.376	8.6755	6.2059	14.6015	18.1023	2.5486	4.2218	31.4599	11.4246	5.9511	16.7963	8.427	0	9.819	36.1858	11.0197	7.6474	10.9364
RC	1	15	1	2	10	2	0.213542	0.359896	0.366771	0.866667	20.4633	2.0867	2.25475	33.376	8.6755	6.2059	14.6015	18.1023	2.5486	4.2218	31.4599	11.4246	5.9511	16.7963	8.427	0	9.819	36.1858	11.0197	7.6474	10.9364
RC	1	62	11	1	48	2	0.530208	0.419792	0.380208	1.30521	20.4633	2.0867	2.25475	33.376	8.6755	6.2059	14.6015	18.1023	2.5486	4.2218	31.4599	11.4246	5.9511	16.7963	8.427	0	9.819	36.1858	11.0197	7.6474	10.9364
ST	2	4	0	2	2	0	0	2.41458	1.5776	0	27.2706	5.5614	3.31853	31.272	14.1576	5.4357	3.3612	27.3105	5.3376	5.6465	34.0616	14.0324	5.4288	6.3468	24.8514	4.5811	20.4593	30.0297	17.9609	1.9219	0.0207
ST	2	82	71	10	1	0	1.82196	0.521667	0.940625	0	27.2706	5.5614	3.31853	31.272	14.1576	5.4357	3.3612	27.3105	5.3376	5.6465	34.0616	14.0324	5.4288	6.3468	24.8514	4.5811	20.4593	30.0297	17.9609	1.9219	0.0207
ST	2	113	88	22	1	2	3.26074	0.132055	0.046875	1.38385	27.2706	5.5614	3.31853	31.272	14.1576	5.4357	3.3612	27.3105	5.3376	5.6465	34.0616	14.0324	5.4288	6.3468	24.8514	4.5811	20.4593	30.0297	17.9609	1.9219	0.0207
ST	1	5	0	1	4	0	0	0.528125	0.623698	0	27.2706	5.5614	3.31853	31.272	14.1576	5.4357	3.3612	27.3105	5.3376	5.6465	34.0616	14.0324	5.4288	6.3468	24.8514	4.5811	20.4593	30.0297	17.9609	1.9219	0.0207
ST	1	40	20	9	11	0	0.251094	0.980324	0.34233	0	27.2706	5.5614	3.31853	31.272	14.1576	5.4357	3.3612	27.3105	5.3376	5.6465	34.0616	14.0324	5.4288	6.3468	24.8514	4.5811	20.4593	30.0297	17.9609	1.9219	0.0207
ST	1	150	94	40	12	4	0.376762	0.533776	0.569965	0.171615	27.2706	5.5614	3.31853	31.272	14.1576	5.4357	3.3612	27.3105	5.3376	5.6465	34.0616	14.0324	5.4288	6.3468	24.8514	4.5811	20.4593	30.0297	17.9609	1.9219	0.0207
TG	2	9	0	0	9	0	0	0	2.34225	0	46.5542	12.1091	0.6506	21.9785	3.0833	7.4129	3.4339	49.2866	15.3168	1.4639	19.376	1.6987	9.2203	1.8164	45.3673	21.8332	5.8564	14.994	0.9221	7.5704	3.456
TG	2	40	27	5	8	0	3.25988	0.197292	0.858464	0	46.5542	12.1091	0.6506	21.9785	3.0833	7.4129	3.4339	49.2866	15.3168	1.4639	19.376	1.6987	9.2203	1.8164	45.3673	21.8332	5.8564	14.994	0.9221	7.5704	3.456
TG	2	63	50	11	2	0	1.6565	0.237311	0.339583	0	46.5542	12.1091	0.6506	21.9785	3.0833	7.4129	3.4339	49.2866	15.3168	1.4639	19.376	1.6987	9.2203	1.8164	45.3673	21.8332	5.8564	14.994	0.9221	7.5704	3.456
TG	1	6	0	0	6	0	0	0	0.748437	0	46.5542	12.1091	0.6506	21.9785	3.0833	7.4129	3.4339	49.2866	15.3168	1.4639	19.376	1.6987	9.2203	1.8164	45.3673	21.8332	5.8564	14.994	0.9221	7.5704	3.456
TG	1	53	18	4	31	0	1.34086	1.2276	1.18538	0	46.5542	12.1091	0.6506	21.9785	3.0833	7.4129	3.4339	49.2866	15.3168	1.4639	19.376	1.6987	9.2203	1.8164	45.3673	21.8332	5.8564	14.994	0.9221	7.5704	3.456
TG	1	96	69	9	18	0	1.51683	0.453241	0.82853	0	46.5542	12.1091	0.6506	21.9785	3.0833	7.4129	3.4339	49.2866	15.3168	1.4639	19.376	1.6987	9.2203	1.8164	45.3673	21.8332	5.8564	14.994	0.9221	7.5704	3.456
TP	2	5	0	0	5	0	0	0	2.34729	0	29.7067	3.9973	1.69967	38.1094	7.9003	7.5998	3.876	35.1232	5.7937	3.7603	34.9998	6.1102	8.0368	4.2889	53.4416	0.9328	1.1457	34.6991	1.1792	2.6977	4.0106
TP	2	37	1	1	30	5	0.828125	0.0583333	0.332535	0.120833	29.7067	3.9973	1.69967	38.1094	7.9003	7.5998	3.876	35.1232	5.7937	3.7603	34.9998	6.1102	8.0368	4.2889	53.4416	0.9328	1.1457	34.6991	1.1792	2.6977	4.0106
TP	2	46	3	0	42	1	1.08125	0	0.310069	0.0229167	29.7067	3.9973	1.69967	38.1094	7.9003	7.5998	3.876	35.1232	5.7937	3.7603	34.9998	6.1102	8.0368	4.2889	53.4416	0.9328	1.1457	34.6991	1.1792	2.6977	4.0106
TP	1	22	0	0	22	0	0	0	1.42244	0	29.7067	3.9973	1.69967	38.1094	7.9003	7.5998	3.876	35.1232	5.7937	3.7603	34.9998	6.1102	8.0368	4.2889	53.4416	0.9328	1.1457	34.6991	1.1792	2.6977	4.0106
TP	1	65	0	0	64	1	0	0	0.406396	0.08125	29.7067	3.9973	1.69967	38.1094	7.9003	7.5998	3.876	35.1232	5.7937	3.7603	34.9998	6.1102	8.0368	4.2889	53.4416	0.9328	1.1457	34.6991	1.1792	2.6977	4.0106
TP	1	17	2	0	13	2	0.199479	0	1.78558	0.0979167	29.7067	3.9973	1.69967	38.1094	7.9003	7.5998	3.876	35.1232	5.7937	3.7603	34.9998	6.1102	8.0368	4.2889	53.4416	0.9328	1.1457	34.6991	1.1792	2.6977	4.0106
WY	2	43	15	19	9	0	1.14069	1.02527	0.600347	0	3.5387	1.2448	1.036	37.9874	6.2955	29.6897	15.6403	4.1524	0	2.3311	41.7515	4.4709	31.8665	13.0636	8.227	0	9.3252	45.6851	2.6505	20.8008	10.0307
WY	2	166	11	93	60	2	1.38258	0.398544	0.331267	2.88073	3.5387	1.2448	1.036	37.9874	6.2955	29.6897	15.6403	4.1524	0	2.3311	41.7515	4.4709	31.8665	13.0636	8.227	0	9.3252	45.6851	2.6505	20.8008	10.0307
WY	2	21	0	16	3	2	0	0.372982	0.107986	0.175	3.5387	1.2448	1.036	37.9874	6.2955	29.6897	15.6403	4.1524	0	2.3311	41.7515	4.4709	31.8665	13.0636	8.227	0	9.3252	45.6851	2.6505	20.8008	10.0307
WY	1	32	0	27	5	0	0	0.816975	0.720208	0	3.5387	1.2448	1.036	37.9874	6.2955	29.6897	15.6403	4.1524	0	2.3311	41.7515	4.4709	31.8665	13.0636	8.227	0	9.3252	45.6851	2.6505	20.8008	10.0307
WY	1	126	2	80	38	6	0.194792	0.358997	0.228152	0.690451	3.5387	1.2448	1.036	37.9874	6.2955	29.6897	15.6403	4.1524	0	2.3311	41.7515	4.4709	31.8665	13.0636	8.227	0	9.3252	45.6851	2.6505	20.8008	10.0307
WY	1	48	0	16	31	1	0	0.583724	0.266566	0.075	3.5387	1.2448	1.036	37.9874	6.2955	29.6897	15.6403	4.1524	0	2.3311	41.7515	4.4709	31.8665	13.0636	8.227	0	9.3252	45.6851	2.6505	20.8008	10.0307

## Sheet: 2011 LS and pollen
site	timetrt	timetrta	grains	pctfield1500	pctforage1500	pctfruitveg1500	pctforest1500	pctgrassland1500	pcturban1500	pctturf1500	pctfield1000	pctforage1000	pctfruitveg1000	pctforest1000	pctgrassland1000	pcturban1000	pctturf1000	pctfield500	pctforage500	pctfruitveg500	pctforest500	pctgrassland500	pcturban500	pctturf500
BA	1	T1	1902	41.2555	5.0688	7.66997	15.7269	7.5705	6.882	6.2746	28.3133	5.8634	17.2198	16.7993	8.6928	9.3638	5.6097	29.2243	3.051	28.4905	21.0031	7.974	5.65	2.5287
BA	1	T1	1264	41.2555	5.0688	7.66997	15.7269	7.5705	6.882	6.2746	28.3133	5.8634	17.2198	16.7993	8.6928	9.3638	5.6097	29.2243	3.051	28.4905	21.0031	7.974	5.65	2.5287
BA	1	T1	1287	41.2555	5.0688	7.66997	15.7269	7.5705	6.882	6.2746	28.3133	5.8634	17.2198	16.7993	8.6928	9.3638	5.6097	29.2243	3.051	28.4905	21.0031	7.974	5.65	2.5287
BA	2	T2	1015	41.2555	5.0688	7.66997	15.7269	7.5705	6.882	6.2746	28.3133	5.8634	17.2198	16.7993	8.6928	9.3638	5.6097	29.2243	3.051	28.4905	21.0031	7.974	5.65	2.5287
BA	2	T2	1302	41.2555	5.0688	7.66997	15.7269	7.5705	6.882	6.2746	28.3133	5.8634	17.2198	16.7993	8.6928	9.3638	5.6097	29.2243	3.051	28.4905	21.0031	7.974	5.65	2.5287
BA	2	T2	734	41.2555	5.0688	7.66997	15.7269	7.5705	6.882	6.2746	28.3133	5.8634	17.2198	16.7993	8.6928	9.3638	5.6097	29.2243	3.051	28.4905	21.0031	7.974	5.65	2.5287
BA	3	T3	665	41.2555	5.0688	7.66997	15.7269	7.5705	6.882	6.2746	28.3133	5.8634	17.2198	16.7993	8.6928	9.3638	5.6097	29.2243	3.051	28.4905	21.0031	7.974	5.65	2.5287
BA	3	T3	835	41.2555	5.0688	7.66997	15.7269	7.5705	6.882	6.2746	28.3133	5.8634	17.2198	16.7993	8.6928	9.3638	5.6097	29.2243	3.051	28.4905	21.0031	7.974	5.65	2.5287
BA	3	T3	924	41.2555	5.0688	7.66997	15.7269	7.5705	6.882	6.2746	28.3133	5.8634	17.2198	16.7993	8.6928	9.3638	5.6097	29.2243	3.051	28.4905	21.0031	7.974	5.65	2.5287
FN	1	T1	NA	24.1611	0.9939	5.2457	31.4731	11.9663	4.235	2.8433	25.7831	2.2362	11.8036	35.2374	9.7022	5.8469	2.4698	13.3118	8.9085	24.2231	36.9672	5.144	10.6544	0.7867
FN	1	T1	NA	24.1611	0.9939	5.2457	31.4731	11.9663	4.235	2.8433	25.7831	2.2362	11.8036	35.2374	9.7022	5.8469	2.4698	13.3118	8.9085	24.2231	36.9672	5.144	10.6544	0.7867
FN	1	T1	NA	24.1611	0.9939	5.2457	31.4731	11.9663	4.235	2.8433	25.7831	2.2362	11.8036	35.2374	9.7022	5.8469	2.4698	13.3118	8.9085	24.2231	36.9672	5.144	10.6544	0.7867
FN	2	T2	NA	24.1611	0.9939	5.2457	31.4731	11.9663	4.235	2.8433	25.7831	2.2362	11.8036	35.2374	9.7022	5.8469	2.4698	13.3118	8.9085	24.2231	36.9672	5.144	10.6544	0.7867
FN	2	T2	NA	24.1611	0.9939	5.2457	31.4731	11.9663	4.235	2.8433	25.7831	2.2362	11.8036	35.2374	9.7022	5.8469	2.4698	13.3118	8.9085	24.2231	36.9672	5.144	10.6544	0.7867
FN	2	T2	NA	24.1611	0.9939	5.2457	31.4731	11.9663	4.235	2.8433	25.7831	2.2362	11.8036	35.2374	9.7022	5.8469	2.4698	13.3118	8.9085	24.2231	36.9672	5.144	10.6544	0.7867
FN	3	T3	NA	24.1611	0.9939	5.2457	31.4731	11.9663	4.235	2.8433	25.7831	2.2362	11.8036	35.2374	9.7022	5.8469	2.4698	13.3118	8.9085	24.2231	36.9672	5.144	10.6544	0.7867
FN	3	T3	NA	24.1611	0.9939	5.2457	31.4731	11.9663	4.235	2.8433	25.7831	2.2362	11.8036	35.2374	9.7022	5.8469	2.4698	13.3118	8.9085	24.2231	36.9672	5.144	10.6544	0.7867
FN	3	T3	NA	24.1611	0.9939	5.2457	31.4731	11.9663	4.235	2.8433	25.7831	2.2362	11.8036	35.2374	9.7022	5.8469	2.4698	13.3118	8.9085	24.2231	36.9672	5.144	10.6544	0.7867
FW	1	T1	739	41.0211	5.2859	0.44248	11.5864	17.0939	6.5847	2.7243	37.5512	8.9046	0.9956	7.9193	20.9331	10.2708	2.21875	19.5337	6.0853	2.3718	10.3248	36.981	19.6256	1.5897
FW	1	T1	1429	41.0211	5.2859	0.44248	11.5864	17.0939	6.5847	2.7243	37.5512	8.9046	0.9956	7.9193	20.9331	10.2708	2.21875	19.5337	6.0853	2.3718	10.3248	36.981	19.6256	1.5897
FW	1	T1	995	41.0211	5.2859	0.44248	11.5864	17.0939	6.5847	2.7243	37.5512	8.9046	0.9956	7.9193	20.9331	10.2708	2.21875	19.5337	6.0853	2.3718	10.3248	36.981	19.6256	1.5897
FW	2	T2	766	41.0211	5.2859	0.44248	11.5864	17.0939	6.5847	2.7243	37.5512	8.9046	0.9956	7.9193	20.9331	10.2708	2.21875	19.5337	6.0853	2.3718	10.3248	36.981	19.6256	1.5897
FW	2	T2	816	41.0211	5.2859	0.44248	11.5864	17.0939	6.5847	2.7243	37.5512	8.9046	0.9956	7.9193	20.9331	10.2708	2.21875	19.5337	6.0853	2.3718	10.3248	36.981	19.6256	1.5897
FW	2	T2	2159	41.0211	5.2859	0.44248	11.5864	17.0939	6.5847	2.7243	37.5512	8.9046	0.9956	7.9193	20.9331	10.2708	2.21875	19.5337	6.0853	2.3718	10.3248	36.981	19.6256	1.5897
FW	3	T3	2031	41.0211	5.2859	0.44248	11.5864	17.0939	6.5847	2.7243	37.5512	8.9046	0.9956	7.9193	20.9331	10.2708	2.21875	19.5337	6.0853	2.3718	10.3248	36.981	19.6256	1.5897
FW	3	T3	1331	41.0211	5.2859	0.44248	11.5864	17.0939	6.5847	2.7243	37.5512	8.9046	0.9956	7.9193	20.9331	10.2708	2.21875	19.5337	6.0853	2.3718	10.3248	36.981	19.6256	1.5897
FW	3	T3	2139	41.0211	5.2859	0.44248	11.5864	17.0939	6.5847	2.7243	37.5512	8.9046	0.9956	7.9193	20.9331	10.2708	2.21875	19.5337	6.0853	2.3718	10.3248	36.981	19.6256	1.5897
JB	1	T1	3243	59.3235	0	3.61883	7.5589	7.9293	5.2445	10.3869	71.8306	0	8.1427	4.8299	4.6123	3.1468	5.34781	72.2194	0	21.3525	1.6168	0.0608	0	0
JB	1	T1	1721	59.3235	0	3.61883	7.5589	7.9293	5.2445	10.3869	71.8306	0	8.1427	4.8299	4.6123	3.1468	5.34781	72.2194	0	21.3525	1.6168	0.0608	0	0
JB	1	T1	3747	59.3235	0	3.61883	7.5589	7.9293	5.2445	10.3869	71.8306	0	8.1427	4.8299	4.6123	3.1468	5.34781	72.2194	0	21.3525	1.6168	0.0608	0	0
JB	2	T2	1058	59.3235	0	3.61883	7.5589	7.9293	5.2445	10.3869	71.8306	0	8.1427	4.8299	4.6123	3.1468	5.34781	72.2194	0	21.3525	1.6168	0.0608	0	0
JB	2	T2	NA	59.3235	0	3.61883	7.5589	7.9293	5.2445	10.3869	71.8306	0	8.1427	4.8299	4.6123	3.1468	5.34781	72.2194	0	21.3525	1.6168	0.0608	0	0
JB	2	T2	NA	59.3235	0	3.61883	7.5589	7.9293	5.2445	10.3869	71.8306	0	8.1427	4.8299	4.6123	3.1468	5.34781	72.2194	0	21.3525	1.6168	0.0608	0	0
JB	3	T3	1784	59.3235	0	3.61883	7.5589	7.9293	5.2445	10.3869	71.8306	0	8.1427	4.8299	4.6123	3.1468	5.34781	72.2194	0	21.3525	1.6168	0.0608	0	0
JB	3	T3	787	59.3235	0	3.61883	7.5589	7.9293	5.2445	10.3869	71.8306	0	8.1427	4.8299	4.6123	3.1468	5.34781	72.2194	0	21.3525	1.6168	0.0608	0	0
JB	3	T3	1368	59.3235	0	3.61883	7.5589	7.9293	5.2445	10.3869	71.8306	0	8.1427	4.8299	4.6123	3.1468	5.34781	72.2194	0	21.3525	1.6168	0.0608	0	0
KG	1	T1	1744	30.8802	3.9384	3.73433	18.8311	15.8494	11.4232	6.4153	32.4866	4.6461	7.5984	13.6856	18.9425	8.4722	7.78832	55.7656	0.6391	3.711	5.7151	20.7782	5.0854	1.5471
KG	1	T1	3491	30.8802	3.9384	3.73433	18.8311	15.8494	11.4232	6.4153	32.4866	4.6461	7.5984	13.6856	18.9425	8.4722	7.78832	55.7656	0.6391	3.711	5.7151	20.7782	5.0854	1.5471
KG	1	T1	2959	30.8802	3.9384	3.73433	18.8311	15.8494	11.4232	6.4153	32.4866	4.6461	7.5984	13.6856	18.9425	8.4722	7.78832	55.7656	0.6391	3.711	5.7151	20.7782	5.0854	1.5471
KG	2	T2	2497	30.8802	3.9384	3.73433	18.8311	15.8494	11.4232	6.4153	32.4866	4.6461	7.5984	13.6856	18.9425	8.4722	7.78832	55.7656	0.6391	3.711	5.7151	20.7782	5.0854	1.5471
KG	2	T2	4306	30.8802	3.9384	3.73433	18.8311	15.8494	11.4232	6.4153	32.4866	4.6461	7.5984	13.6856	18.9425	8.4722	7.78832	55.7656	0.6391	3.711	5.7151	20.7782	5.0854	1.5471
KG	2	T2	2472	30.8802	3.9384	3.73433	18.8311	15.8494	11.4232	6.4153	32.4866	4.6461	7.5984	13.6856	18.9425	8.4722	7.78832	55.7656	0.6391	3.711	5.7151	20.7782	5.0854	1.5471
KG	3	T3	2526	30.8802	3.9384	3.73433	18.8311	15.8494	11.4232	6.4153	32.4866	4.6461	7.5984	13.6856	18.9425	8.4722	7.78832	55.7656	0.6391	3.711	5.7151	20.7782	5.0854	1.5471
KG	3	T3	2363	30.8802	3.9384	3.73433	18.8311	15.8494	11.4232	6.4153	32.4866	4.6461	7.5984	13.6856	18.9425	8.4722	7.78832	55.7656	0.6391	3.711	5.7151	20.7782	5.0854	1.5471
KG	3	T3	2694	30.8802	3.9384	3.73433	18.8311	15.8494	11.4232	6.4153	32.4866	4.6461	7.5984	13.6856	18.9425	8.4722	7.78832	55.7656	0.6391	3.711	5.7151	20.7782	5.0854	1.5471
PK	1	T1	NA	8.7239	5.5492	0.446	40.2614	15.2171	10.8967	11.3807	14.0141	6.4137	1.0031	31.1499	16.2132	16.8478	8.88492	21.852	7.5821	4.0129	13.7927	5.8739	25.0412	16.4221
PK	1	T1	NA	8.7239	5.5492	0.446	40.2614	15.2171	10.8967	11.3807	14.0141	6.4137	1.0031	31.1499	16.2132	16.8478	8.88492	21.852	7.5821	4.0129	13.7927	5.8739	25.0412	16.4221
PK	1	T1	NA	8.7239	5.5492	0.446	40.2614	15.2171	10.8967	11.3807	14.0141	6.4137	1.0031	31.1499	16.2132	16.8478	8.88492	21.852	7.5821	4.0129	13.7927	5.8739	25.0412	16.4221
PK	2	T2	NA	8.7239	5.5492	0.446	40.2614	15.2171	10.8967	11.3807	14.0141	6.4137	1.0031	31.1499	16.2132	16.8478	8.88492	21.852	7.5821	4.0129	13.7927	5.8739	25.0412	16.4221
PK	2	T2	NA	8.7239	5.5492	0.446	40.2614	15.2171	10.8967	11.3807	14.0141	6.4137	1.0031	31.1499	16.2132	16.8478	8.88492	21.852	7.5821	4.0129	13.7927	5.8739	25.0412	16.4221
PK	2	T2	NA	8.7239	5.5492	0.446	40.2614	15.2171	10.8967	11.3807	14.0141	6.4137	1.0031	31.1499	16.2132	16.8478	8.88492	21.852	7.5821	4.0129	13.7927	5.8739	25.0412	16.4221
PK	3	T3	NA	8.7239	5.5492	0.446	40.2614	15.2171	10.8967	11.3807	14.0141	6.4137	1.0031	31.1499	16.2132	16.8478	8.88492	21.852	7.5821	4.0129	13.7927	5.8739	25.0412	16.4221
PK	3	T3	NA	8.7239	5.5492	0.446	40.2614	15.2171	10.8967	11.3807	14.0141	6.4137	1.0031	31.1499	16.2132	16.8478	8.88492	21.852	7.5821	4.0129	13.7927	5.8739	25.0412	16.4221
PK	3	T3	NA	8.7239	5.5492	0.446	40.2614	15.2171	10.8967	11.3807	14.0141	6.4137	1.0031	31.1499	16.2132	16.8478	8.88492	21.852	7.5821	4.0129	13.7927	5.8739	25.0412	16.4221
RC	1	T1	2389	20.4633	2.0867	2.25475	33.376	8.6755	6.2059	14.6015	18.1023	2.5486	4.2218	31.4599	11.4246	5.9511	16.7963	8.427	0	9.819	36.1858	11.0197	7.6474	10.9364
RC	1	T1	2720	20.4633	2.0867	2.25475	33.376	8.6755	6.2059	14.6015	18.1023	2.5486	4.2218	31.4599	11.4246	5.9511	16.7963	8.427	0	9.819	36.1858	11.0197	7.6474	10.9364
RC	1	T1	3822	20.4633	2.0867	2.25475	33.376	8.6755	6.2059	14.6015	18.1023	2.5486	4.2218	31.4599	11.4246	5.9511	16.7963	8.427	0	9.819	36.1858	11.0197	7.6474	10.9364
RC	2	T2	4129	20.4633	2.0867	2.25475	33.376	8.6755	6.2059	14.6015	18.1023	2.5486	4.2218	31.4599	11.4246	5.9511	16.7963	8.427	0	9.819	36.1858	11.0197	7.6474	10.9364
RC	2	T2	1436	20.4633	2.0867	2.25475	33.376	8.6755	6.2059	14.6015	18.1023	2.5486	4.2218	31.4599	11.4246	5.9511	16.7963	8.427	0	9.819	36.1858	11.0197	7.6474	10.9364
RC	2	T2	1311	20.4633	2.0867	2.25475	33.376	8.6755	6.2059	14.6015	18.1023	2.5486	4.2218	31.4599	11.4246	5.9511	16.7963	8.427	0	9.819	36.1858	11.0197	7.6474	10.9364
RC	3	T3	1498	20.4633	2.0867	2.25475	33.376	8.6755	6.2059	14.6015	18.1023	2.5486	4.2218	31.4599	11.4246	5.9511	16.7963	8.427	0	9.819	36.1858	11.0197	7.6474	10.9364
RC	3	T3	1981	20.4633	2.0867	2.25475	33.376	8.6755	6.2059	14.6015	18.1023	2.5486	4.2218	31.4599	11.4246	5.9511	16.7963	8.427	0	9.819	36.1858	11.0197	7.6474	10.9364
RC	3	T3	2516	20.4633	2.0867	2.25475	33.376	8.6755	6.2059	14.6015	18.1023	2.5486	4.2218	31.4599	11.4246	5.9511	16.7963	8.427	0	9.819	36.1858	11.0197	7.6474	10.9364
ST	1	T1	676	27.2706	5.5614	3.31853	31.272	14.1576	5.4357	3.3612	27.3105	5.3376	5.6465	34.0616	14.0324	5.4288	6.3468	24.8514	4.5811	20.4593	30.0297	17.9609	1.9219	0.0207
ST	1	T1	1296	27.2706	5.5614	3.31853	31.272	14.1576	5.4357	3.3612	27.3105	5.3376	5.6465	34.0616	14.0324	5.4288	6.3468	24.8514	4.5811	20.4593	30.0297	17.9609	1.9219	0.0207
ST	1	T1	1558	27.2706	5.5614	3.31853	31.272	14.1576	5.4357	3.3612	27.3105	5.3376	5.6465	34.0616	14.0324	5.4288	6.3468	24.8514	4.5811	20.4593	30.0297	17.9609	1.9219	0.0207
ST	2	T2	3722	27.2706	5.5614	3.31853	31.272	14.1576	5.4357	3.3612	27.3105	5.3376	5.6465	34.0616	14.0324	5.4288	6.3468	24.8514	4.5811	20.4593	30.0297	17.9609	1.9219	0.0207
ST	2	T2	1546	27.2706	5.5614	3.31853	31.272	14.1576	5.4357	3.3612	27.3105	5.3376	5.6465	34.0616	14.0324	5.4288	6.3468	24.8514	4.5811	20.4593	30.0297	17.9609	1.9219	0.0207
ST	2	T2	1221	27.2706	5.5614	3.31853	31.272	14.1576	5.4357	3.3612	27.3105	5.3376	5.6465	34.0616	14.0324	5.4288	6.3468	24.8514	4.5811	20.4593	30.0297	17.9609	1.9219	0.0207
ST	3	T3	1932	27.2706	5.5614	3.31853	31.272	14.1576	5.4357	3.3612	27.3105	5.3376	5.6465	34.0616	14.0324	5.4288	6.3468	24.8514	4.5811	20.4593	30.0297	17.9609	1.9219	0.0207
ST	3	T3	2002	27.2706	5.5614	3.31853	31.272	14.1576	5.4357	3.3612	27.3105	5.3376	5.6465	34.0616	14.0324	5.4288	6.3468	24.8514	4.5811	20.4593	30.0297	17.9609	1.9219	0.0207
ST	3	T3	3877	27.2706	5.5614	3.31853	31.272	14.1576	5.4357	3.3612	27.3105	5.3376	5.6465	34.0616	14.0324	5.4288	6.3468	24.8514	4.5811	20.4593	30.0297	17.9609	1.9219	0.0207
TG	1	T1	656	27.2706	5.5614	3.31853	31.272	14.1576	5.4357	3.3612	27.3105	5.3376	5.6465	34.0616	14.0324	5.4288	6.3468	24.8514	4.5811	20.4593	30.0297	17.9609	1.9219	0.0207
TG	1	T1	1775	46.5542	12.1091	0.6506	21.9785	3.0833	7.4129	3.4339	49.2866	15.3168	1.4639	19.376	1.6987	9.2203	1.8164	45.3673	21.8332	5.8564	14.994	0.9221	7.5704	3.456
TG	1	T1	3057	46.5542	12.1091	0.6506	21.9785	3.0833	7.4129	3.4339	49.2866	15.3168	1.4639	19.376	1.6987	9.2203	1.8164	45.3673	21.8332	5.8564	14.994	0.9221	7.5704	3.456
TG	2	T2	960	46.5542	12.1091	0.6506	21.9785	3.0833	7.4129	3.4339	49.2866	15.3168	1.4639	19.376	1.6987	9.2203	1.8164	45.3673	21.8332	5.8564	14.994	0.9221	7.5704	3.456
TG	2	T2	1185	46.5542	12.1091	0.6506	21.9785	3.0833	7.4129	3.4339	49.2866	15.3168	1.4639	19.376	1.6987	9.2203	1.8164	45.3673	21.8332	5.8564	14.994	0.9221	7.5704	3.456
TG	2	T2	1747	46.5542	12.1091	0.6506	21.9785	3.0833	7.4129	3.4339	49.2866	15.3168	1.4639	19.376	1.6987	9.2203	1.8164	45.3673	21.8332	5.8564	14.994	0.9221	7.5704	3.456
TG	3	T3	2516	46.5542	12.1091	0.6506	21.9785	3.0833	7.4129	3.4339	49.2866	15.3168	1.4639	19.376	1.6987	9.2203	1.8164	45.3673	21.8332	5.8564	14.994	0.9221	7.5704	3.456
TG	3	T3	1618	46.5542	12.1091	0.6506	21.9785	3.0833	7.4129	3.4339	49.2866	15.3168	1.4639	19.376	1.6987	9.2203	1.8164	45.3673	21.8332	5.8564	14.994	0.9221	7.5704	3.456
TG	3	T3	121	46.5542	12.1091	0.6506	21.9785	3.0833	7.4129	3.4339	49.2866	15.3168	1.4639	19.376	1.6987	9.2203	1.8164	45.3673	21.8332	5.8564	14.994	0.9221	7.5704	3.456
TP	1	T1	1510	29.7067	3.9973	1.69967	38.1094	7.9003	7.5998	3.876	35.1232	5.7937	3.7603	34.9998	6.1102	8.0368	4.2889	53.4416	0.9328	1.1457	34.6991	1.1792	2.6977	4.0106
TP	1	T1	1844	29.7067	3.9973	1.69967	38.1094	7.9003	7.5998	3.876	35.1232	5.7937	3.7603	34.9998	6.1102	8.0368	4.2889	53.4416	0.9328	1.1457	34.6991	1.1792	2.6977	4.0106
TP	1	T1	1286	29.7067	3.9973	1.69967	38.1094	7.9003	7.5998	3.876	35.1232	5.7937	3.7603	34.9998	6.1102	8.0368	4.2889	53.4416	0.9328	1.1457	34.6991	1.1792	2.6977	4.0106
TP	2	T2	866	29.7067	3.9973	1.69967	38.1094	7.9003	7.5998	3.876	35.1232	5.7937	3.7603	34.9998	6.1102	8.0368	4.2889	53.4416	0.9328	1.1457	34.6991	1.1792	2.6977	4.0106
TP	2	T2	1038	29.7067	3.9973	1.69967	38.1094	7.9003	7.5998	3.876	35.1232	5.7937	3.7603	34.9998	6.1102	8.0368	4.2889	53.4416	0.9328	1.1457	34.6991	1.1792	2.6977	4.0106
TP	2	T2	666	29.7067	3.9973	1.69967	38.1094	7.9003	7.5998	3.876	35.1232	5.7937	3.7603	34.9998	6.1102	8.0368	4.2889	53.4416	0.9328	1.1457	34.6991	1.1792	2.6977	4.0106
TP	3	T3	1144	29.7067	3.9973	1.69967	38.1094	7.9003	7.5998	3.876	35.1232	5.7937	3.7603	34.9998	6.1102	8.0368	4.2889	53.4416	0.9328	1.1457	34.6991	1.1792	2.6977	4.0106
TP	3	T3	778	29.7067	3.9973	1.69967	38.1094	7.9003	7.5998	3.876	35.1232	5.7937	3.7603	34.9998	6.1102	8.0368	4.2889	53.4416	0.9328	1.1457	34.6991	1.1792	2.6977	4.0106
TP	3	T3	847	29.7067	3.9973	1.69967	38.1094	7.9003	7.5998	3.876	35.1232	5.7937	3.7603	34.9998	6.1102	8.0368	4.2889	53.4416	0.9328	1.1457	34.6991	1.1792	2.6977	4.0106
WE	1	T1	NA	64.4346	4.2742	1.80621	10.6264	7.7508	3.8678	1.2611	81.5621	0.4106	2.6228	2.7573	7.979	3.1018	0.9266	82.6381	0	9.5685	0	2.8841	3.8095	0
WE	1	T1	NA	64.4346	4.2742	1.80621	10.6264	7.7508	3.8678	1.2611	81.5621	0.4106	2.6228	2.7573	7.979	3.1018	0.9266	82.6381	0	9.5685	0	2.8841	3.8095	0
WE	1	T1	NA	64.4346	4.2742	1.80621	10.6264	7.7508	3.8678	1.2611	81.5621	0.4106	2.6228	2.7573	7.979	3.1018	0.9266	82.6381	0	9.5685	0	2.8841	3.8095	0
WE	2	T2	NA	64.4346	4.2742	1.80621	10.6264	7.7508	3.8678	1.2611	81.5621	0.4106	2.6228	2.7573	7.979	3.1018	0.9266	82.6381	0	9.5685	0	2.8841	3.8095	0
WE	2	T2	NA	64.4346	4.2742	1.80621	10.6264	7.7508	3.8678	1.2611	81.5621	0.4106	2.6228	2.7573	7.979	3.1018	0.9266	82.6381	0	9.5685	0	2.8841	3.8095	0
WE	2	T2	NA	64.4346	4.2742	1.80621	10.6264	7.7508	3.8678	1.2611	81.5621	0.4106	2.6228	2.7573	7.979	3.1018	0.9266	82.6381	0	9.5685	0	2.8841	3.8095	0
WE	3	T3	NA	64.4346	4.2742	1.80621	10.6264	7.7508	3.8678	1.2611	81.5621	0.4106	2.6228	2.7573	7.979	3.1018	0.9266	82.6381	0	9.5685	0	2.8841	3.8095	0
WE	3	T3	NA	64.4346	4.2742	1.80621	10.6264	7.7508	3.8678	1.2611	81.5621	0.4106	2.6228	2.7573	7.979	3.1018	0.9266	82.6381	0	9.5685	0	2.8841	3.8095	0
WE	3	T3	NA	64.4346	4.2742	1.80621	10.6264	7.7508	3.8678	1.2611	81.5621	0.4106	2.6228	2.7573	7.979	3.1018	0.9266	82.6381	0	9.5685	0	2.8841	3.8095	0
WY	1	T1	1695	3.5387	1.2448	1.036	37.9874	6.2955	29.6897	15.6403	4.1524	0	2.3311	41.7515	4.4709	31.8665	13.0636	8.227	0	9.3252	45.6851	2.6505	20.8008	10.0307
WY	1	T1	2480	3.5387	1.2448	1.036	37.9874	6.2955	29.6897	15.6403	4.1524	0	2.3311	41.7515	4.4709	31.8665	13.0636	8.227	0	9.3252	45.6851	2.6505	20.8008	10.0307
WY	1	T1	3190	3.5387	1.2448	1.036	37.9874	6.2955	29.6897	15.6403	4.1524	0	2.3311	41.7515	4.4709	31.8665	13.0636	8.227	0	9.3252	45.6851	2.6505	20.8008	10.0307
WY	2	T2	2987	3.5387	1.2448	1.036	37.9874	6.2955	29.6897	15.6403	4.1524	0	2.3311	41.7515	4.4709	31.8665	13.0636	8.227	0	9.3252	45.6851	2.6505	20.8008	10.0307
WY	2	T2	1986	3.5387	1.2448	1.036	37.9874	6.2955	29.6897	15.6403	4.1524	0	2.3311	41.7515	4.4709	31.8665	13.0636	8.227	0	9.3252	45.6851	2.6505	20.8008	10.0307
WY	2	T2	3528	3.5387	1.2448	1.036	37.9874	6.2955	29.6897	15.6403	4.1524	0	2.3311	41.7515	4.4709	31.8665	13.0636	8.227	0	9.3252	45.6851	2.6505	20.8008	10.0307
WY	3	T3	1793.5	3.5387	1.2448	1.036	37.9874	6.2955	29.6897	15.6403	4.1524	0	2.3311	41.7515	4.4709	31.8665	13.0636	8.227	0	9.3252	45.6851	2.6505	20.8008	10.0307
WY	3	T3	1793.5	3.5387	1.2448	1.036	37.9874	6.2955	29.6897	15.6403	4.1524	0	2.3311	41.7515	4.4709	31.8665	13.0636	8.227	0	9.3252	45.6851	2.6505	20.8008	10.0307
WY	3	T3	NA	3.5387	1.2448	1.036	37.9874	6.2955	29.6897	15.6403	4.1524	0	2.3311	41.7515	4.4709	31.8665	13.0636	8.227	0	9.3252	45.6851	2.6505	20.8008	10.0307

## Sheet: 2012 LS and pollinatorvids
site	wintrt	sitetrt	sitetrta	sex	sexa	all	hb	bb	sb	other	prophb	propbb	probsb	propother	avgminhb	avgminbb	avgminsb	avgminother	pctfield1500	pctforage1500	pctfruitveg1500	pctforest1500	pctgrassland1500	pcturban1500	pctturf1500	pctfield1000	pctforage1000	pctfruitveg1000	pctforest1000	pctgrassland1000	pcturban1000	pctturf1000	pctfield500	pctforage500	pctfruitveg500	pctforest500	pctgrassland500	pcturban500	pctturf500
BAa	1	2	a	2	f	24	20	4	0	0	0.833333	0.166667	0	0	1.4325	0.864583	0	0	42.72	0.13	4.33	13.89	5.56	12.64	9.44	51	0.29	1.43	13.93	7.05	8.56	8.53	59.55	0	0	20.56	7.38	6.68	5.56
BAa	2	2	a	2	f	72	72	0	0	0	1	0	0	0	1.00473	0	0	0	42.72	0.13	4.33	13.89	5.56	12.64	9.44	51	0.29	1.43	13.93	7.05	8.56	8.53	59.55	0	0	20.56	7.38	6.68	5.56
BAa	3	2	a	2	f	39	32	6	0	1	0.820513	0.153846	0	0.025641	0.799382	0.123611	0	0.758333	42.72	0.13	4.33	13.89	5.56	12.64	9.44	51	0.29	1.43	13.93	7.05	8.56	8.53	59.55	0	0	20.56	7.38	6.68	5.56
BAa	1	2	a	1	m	2	1	1	0	0	0.5	0.5	0	0	0.253125	0.169792	0	0	42.72	0.13	4.33	13.89	5.56	12.64	9.44	51	0.29	1.43	13.93	7.05	8.56	8.53	59.55	0	0	20.56	7.38	6.68	5.56
BAa	2	2	a	1	m	7	3	4	0	0	0.428571	0.571429	0	0	0.45625	0.147917	0	0	42.72	0.13	4.33	13.89	5.56	12.64	9.44	51	0.29	1.43	13.93	7.05	8.56	8.53	59.55	0	0	20.56	7.38	6.68	5.56
BAa	3	2	a	1	m	26	8	17	0	1	0.307692	0.653846	0	0.0384615	0.659245	0.9	0	0.632292	42.72	0.13	4.33	13.89	5.56	12.64	9.44	51	0.29	1.43	13.93	7.05	8.56	8.53	59.55	0	0	20.56	7.38	6.68	5.56
FNc	1	1	c	2	f	5	0	5	0	0	0	1	0	0	0	2.52396	0	0	18.65	5.96	3.37	35.44	8.97	3.3	6.07	10.9	6.53	7.59	38.42	10.56	2.19	7.18	8.17	19.76	28.03	29.25	0.27	0.35	0
FNc	2	1	c	2	f	109	1	105	3	0	0.00917431	0.963303	0.0275229	0	3.58646	0.846091	0.301389	0	18.65	5.96	3.37	35.44	8.97	3.3	6.07	10.9	6.53	7.59	38.42	10.56	2.19	7.18	8.17	19.76	28.03	29.25	0.27	0.35	0
FNc	3	1	c	2	f	89	3	83	0	3	0.0337079	0.932584	0	0.0337079	0.507986	0.294026	0	1.31632	18.65	5.96	3.37	35.44	8.97	3.3	6.07	10.9	6.53	7.59	38.42	10.56	2.19	7.18	8.17	19.76	28.03	29.25	0.27	0.35	0
FNc	1	1	c	1	m	4	0	4	0	0	0	1	0	0	0	0.704688	0	0	18.65	5.96	3.37	35.44	8.97	3.3	6.07	10.9	6.53	7.59	38.42	10.56	2.19	7.18	8.17	19.76	28.03	29.25	0.27	0.35	0
FNc	2	1	c	1	m	69	0	65	4	0	0	0.942029	0.057971	0	0	0.478157	0.18099	0	18.65	5.96	3.37	35.44	8.97	3.3	6.07	10.9	6.53	7.59	38.42	10.56	2.19	7.18	8.17	19.76	28.03	29.25	0.27	0.35	0
FNc	3	1	c	1	m	86	0	83	3	0	0	0.965116	0.0348837	0	0	0.613228	0.460417	0	18.65	5.96	3.37	35.44	8.97	3.3	6.07	10.9	6.53	7.59	38.42	10.56	2.19	7.18	8.17	19.76	28.03	29.25	0.27	0.35	0
FWp	1	3	p	2	f	38	0	28	10	0	0	0.736842	0.263158	0	0	7.76905	0.595833	0	36.77	4.66	2.66	13.67	10.31	8.86	3.98	32.45	7.9	1.33	12.1	14.2	12.33	2.63	17.88	8.34	4.23	14.67	26.92	24.48	1.42
FWp	2	3	p	2	f	49	0	48	1	0	0	0.979592	0.0204082	0	0	9.26929	0.0604167	0	36.77	4.66	2.66	13.67	10.31	8.86	3.98	32.45	7.9	1.33	12.1	14.2	12.33	2.63	17.88	8.34	4.23	14.67	26.92	24.48	1.42
FWp	3	3	p	2	f	16	0	16	0	0	0	1	0	0	0	4.30853	0	0	36.77	4.66	2.66	13.67	10.31	8.86	3.98	32.45	7.9	1.33	12.1	14.2	12.33	2.63	17.88	8.34	4.23	14.67	26.92	24.48	1.42
FWp	1	3	p	1	m	116	0	68	48	0	0	0.586207	0.413793	0	0	1.39816	0.987826	0	36.77	4.66	2.66	13.67	10.31	8.86	3.98	32.45	7.9	1.33	12.1	14.2	12.33	2.63	17.88	8.34	4.23	14.67	26.92	24.48	1.42
FWp	2	3	p	1	m	140	0	86	44	10	0	0.614286	0.314286	0.0714286	0	4.50471	0.775473	0.473438	36.77	4.66	2.66	13.67	10.31	8.86	3.98	32.45	7.9	1.33	12.1	14.2	12.33	2.63	17.88	8.34	4.23	14.67	26.92	24.48	1.42
FWp	3	3	p	1	m	79	0	56	15	8	0	0.708861	0.189873	0.101266	0	1.61254	1.26132	0.471094	36.77	4.66	2.66	13.67	10.31	8.86	3.98	32.45	7.9	1.33	12.1	14.2	12.33	2.63	17.88	8.34	4.23	14.67	26.92	24.48	1.42
JBa	1	2	a	2	f	60	15	36	9	0	0.25	0.6	0.15	0	1.97562	2.65558	1.01238	0	56.95	0.8	2.87	11.59	3.16	8.57	11.11	67.21	0	6.45	5.03	3.5	4.08	8.04	64.42	0	13.6	0.96	0	4.34	0.85
JBa	2	2	a	2	f	34	0	33	1	0	0	0.970588	0.0294118	0	0	2.51313	0.125	0	56.95	0.8	2.87	11.59	3.16	8.57	11.11	67.21	0	6.45	5.03	3.5	4.08	8.04	64.42	0	13.6	0.96	0	4.34	0.85
JBa	3	2	a	2	f	8	0	6	2	0	0	0.75	0.25	0	0	6.60729	0.341146	0	56.95	0.8	2.87	11.59	3.16	8.57	11.11	67.21	0	6.45	5.03	3.5	4.08	8.04	64.42	0	13.6	0.96	0	4.34	0.85
JBa	1	2	a	1	m	94	2	70	22	0	0.0212766	0.744681	0.234043	0	0.792188	0.946979	0.604545	0	56.95	0.8	2.87	11.59	3.16	8.57	11.11	67.21	0	6.45	5.03	3.5	4.08	8.04	64.42	0	13.6	0.96	0	4.34	0.85
JBa	2	2	a	1	m	124	0	113	11	0	0	0.91129	0.0887097	0	0	0.598378	0.222538	0	56.95	0.8	2.87	11.59	3.16	8.57	11.11	67.21	0	6.45	5.03	3.5	4.08	8.04	64.42	0	13.6	0.96	0	4.34	0.85
JBa	3	2	a	1	m	19	1	16	2	0	0.0526316	0.842105	0.105263	0	0.0666667	0.406055	0.090625	0	56.95	0.8	2.87	11.59	3.16	8.57	11.11	67.21	0	6.45	5.03	3.5	4.08	8.04	64.42	0	13.6	0.96	0	4.34	0.85
JBp	1	3	p	2	f	41	0	2	39	0	0	0.0487805	0.95122	0	0	2.99792	0.895967	0	62.19	0.16	2.52	8.85	2.68	5.33	9.07	73.23	0	5.66	5.61	0.84	2.9	5.15	62.57	0	21.56	1.94	0	0	0
JBp	2	3	p	2	f	9	0	4	5	0	0	0.444444	0.555556	0	0	1.57031	0.225833	0	62.19	0.16	2.52	8.85	2.68	5.33	9.07	73.23	0	5.66	5.61	0.84	2.9	5.15	62.57	0	21.56	1.94	0	0	0
JBp	3	3	p	2	f														62.19	0.16	2.52	8.85	2.68	5.33	9.07	73.23	0	5.66	5.61	0.84	2.9	5.15	62.57	0	21.56	1.94	0	0	0
JBp	1	3	p	1	m	42	0	7	35	0	0	0.166667	0.833333	0	0	1.79777	0.338274	0	62.19	0.16	2.52	8.85	2.68	5.33	9.07	73.23	0	5.66	5.61	0.84	2.9	5.15	62.57	0	21.56	1.94	0	0	0
JBp	2	3	p	1	m	21	1	5	15	0	0.047619	0.238095	0.714286	0	0.25	0.239792	0.280625	0	62.19	0.16	2.52	8.85	2.68	5.33	9.07	73.23	0	5.66	5.61	0.84	2.9	5.15	62.57	0	21.56	1.94	0	0	0
JBp	3	3	p	1	m														62.19	0.16	2.52	8.85	2.68	5.33	9.07	73.23	0	5.66	5.61	0.84	2.9	5.15	62.57	0	21.56	1.94	0	0	0
KGc	1	1	c	2	f	4	0	0	4	0	0	0	1	0	0	0	1.23125	0	56.95	0.8	2.87	11.59	3.16	8.57	11.11	67.21	0	6.45	5.03	3.5	4.08	8.04	64.42	0	13.6	0.96	0	4.34	0.85
KGc	2	1	c	2	f	125	23	72	28	2	0.184	0.576	0.224	0.016	3.12043	0.849523	0.589732	1.38073	27.58	0	4.6	19.92	14.86	9.38	14.55	37.11	0	6.45	16.05	18.91	9.8	8.88	54.19	0	6.52	6.41	18.74	4.56	4.45
KGc	3	1	c	2	f	171	18	137	14	2	0.105263	0.80117	0.0818713	0.0116959	3.47431	0.658371	1.04792	0.157812	27.58	0	4.6	19.92	14.86	9.38	14.55	37.11	0	6.45	16.05	18.91	9.8	8.88	54.19	0	6.52	6.41	18.74	4.56	4.45
KGc	1	1	c	1	m	2	0	0	2	0	0	0	1	0	0	0	0.847917	0	27.58	0	4.6	19.92	14.86	9.38	14.55	37.11	0	6.45	16.05	18.91	9.8	8.88	54.19	0	6.52	6.41	18.74	4.56	4.45
KGc	2	1	c	1	m	66	0	65	1	0	0	0.984848	0.0151515	0	0	0.484231	0.0989583	0	27.58	0	4.6	19.92	14.86	9.38	14.55	37.11	0	6.45	16.05	18.91	9.8	8.88	54.19	0	6.52	6.41	18.74	4.56	4.45
KGc	3	1	c	1	m	167	5	152	7	3	0.0299401	0.91018	0.0419162	0.0179641	0.526458	0.543695	0.280208	0.436458	27.58	0	4.6	19.92	14.86	9.38	14.55	37.11	0	6.45	16.05	18.91	9.8	8.88	54.19	0	6.52	6.41	18.74	4.56	4.45
PKa	1	2	a	2	f	175	13	142	20	0	0.0742857	0.811429	0.114286	0	12.359	0.539437	0.496146	0	12.87	1.08	0.07	46.2	11.52	12.95	13.42	20.47	2.42	0.15	32.04	11.74	19.17	10.81	21.66	7.46	0.6	19.61	4.25	31.85	5.17
PKa	2	2	a	2	f	203	43	150	10	0	0.211823	0.738916	0.0492611	0	6.23643	0.873667	0.0784375	0	12.87	1.08	0.07	46.2	11.52	12.95	13.42	20.47	2.42	0.15	32.04	11.74	19.17	10.81	21.66	7.46	0.6	19.61	4.25	31.85	5.17
PKa	3	2	a	2	f	21	0	19	1	1	0	0.904762	0.047619	0.047619	0	0.471327	11.8229	0.482292	12.87	1.08	0.07	46.2	11.52	12.95	13.42	20.47	2.42	0.15	32.04	11.74	19.17	10.81	21.66	7.46	0.6	19.61	4.25	31.85	5.17
PKa	1	2	a	1	m	168	15	140	13	0	0.0892857	0.833333	0.077381	0	0.480208	0.619591	0.305048	0	12.87	1.08	0.07	46.2	11.52	12.95	13.42	20.47	2.42	0.15	32.04	11.74	19.17	10.81	21.66	7.46	0.6	19.61	4.25	31.85	5.17
PKa	2	2	a	1	m	133	8	120	5	0	0.0601504	0.902256	0.037594	0	0.804688	0.925425	0.592917	0	12.87	1.08	0.07	46.2	11.52	12.95	13.42	20.47	2.42	0.15	32.04	11.74	19.17	10.81	21.66	7.46	0.6	19.61	4.25	31.85	5.17
PKa	3	2	a	1	m	14	0	14	0	0	0	1	0	0	0	0.515551	0	0	12.87	1.08	0.07	46.2	11.52	12.95	13.42	20.47	2.42	0.15	32.04	11.74	19.17	10.81	21.66	7.46	0.6	19.61	4.25	31.85	5.17
PKp	1	3	p	2	f	4	0	1	3	0	0	0.25	0.75	0	0	1.76354	1.12708	0	12.87	1.08	0.07	46.2	11.52	12.95	13.42	20.47	2.42	0.15	32.04	11.74	19.17	10.81	21.66	7.46	0.6	19.61	4.25	31.85	5.17
PKp	2	3	p	2	f	65	0	63	2	0	0	0.969231	0.0307692	0	0	0.887302	0.486458	0	12.87	1.08	0.07	46.2	11.52	12.95	13.42	20.47	2.42	0.15	32.04	11.74	19.17	10.81	21.66	7.46	0.6	19.61	4.25	31.85	5.17
PKp	3	3	p	2	f	136	1	123	12	0	0.00735294	0.904412	0.0882353	0	0.402083	1.28759	0.582552	0	12.87	1.08	0.07	46.2	11.52	12.95	13.42	20.47	2.42	0.15	32.04	11.74	19.17	10.81	21.66	7.46	0.6	19.61	4.25	31.85	5.17
PKp	1	3	p	1	m	4	0	0	4	0	0	0	1	0	0	0	0.718229	0	12.87	1.08	0.07	46.2	11.52	12.95	13.42	20.47	2.42	0.15	32.04	11.74	19.17	10.81	21.66	7.46	0.6	19.61	4.25	31.85	5.17
PKp	2	3	p	1	m	71	0	70	1	0	0	0.985915	0.0140845	0	0	0.891756	0.0916667	0	12.87	1.08	0.07	46.2	11.52	12.95	13.42	20.47	2.42	0.15	32.04	11.74	19.17	10.81	21.66	7.46	0.6	19.61	4.25	31.85	5.17
PKp	3	3	p	1	m	132	3	129	0	0	0.0227273	0.977273	0	0	0.611111	1.45333	0	0	12.87	1.08	0.07	46.2	11.52	12.95	13.42	20.47	2.42	0.15	32.04	11.74	19.17	10.81	21.66	7.46	0.6	19.61	4.25	31.85	5.17
RCc	1	1	c	2	f	130	1	129	0	0	0.00769231	0.992308	0	0	1.44479	0.695575	0	0	14.33	0.16	4.6	37.7	7.97	6.18	17.92	15.47	0	7.17	33.79	6.94	6.43	16.44	9.53	0	15.68	39.85	4.16	6.29	9.16
RCc	2	1	c	2	f	375	7	364	4	0	0.0186667	0.970667	0.0106667	0	0.810119	1.22905	0.133594	0	14.33	0.16	4.6	37.7	7.97	6.18	17.92	15.47	0	7.17	33.79	6.94	6.43	16.44	9.53	0	15.68	39.85	4.16	6.29	9.16
RCc	3	1	c	2	f	225	12	209	4	0	0.0533333	0.928889	0.0177778	0	6.35286	0.605318	0.0552083	0	14.33	0.16	4.6	37.7	7.97	6.18	17.92	15.47	0	7.17	33.79	6.94	6.43	16.44	9.53	0	15.68	39.85	4.16	6.29	9.16
RCc	1	1	c	1	m	93	0	92	1	0	0	0.989247	0.0107527	0	0	0.391327	0.0520833	0	14.33	0.16	4.6	37.7	7.97	6.18	17.92	15.47	0	7.17	33.79	6.94	6.43	16.44	9.53	0	15.68	39.85	4.16	6.29	9.16
RCc	2	1	c	1	m	360	8	352	0	0	0.0222222	0.977778	0	0	3.92786	0.468954	0	0	14.33	0.16	4.6	37.7	7.97	6.18	17.92	15.47	0	7.17	33.79	6.94	6.43	16.44	9.53	0	15.68	39.85	4.16	6.29	9.16
RCc	3	1	c	1	m	228	16	211	1	0	0.0701754	0.925439	0.00438597	0	0.910677	0.75037	0.034375	0	14.33	0.16	4.6	37.7	7.97	6.18	17.92	15.47	0	7.17	33.79	6.94	6.43	16.44	9.53	0	15.68	39.85	4.16	6.29	9.16
RTa	1	2	a	2	f	1	0	0	1	0	0	0	1	0	0	0	5.26354	0	15.59	1.54	7.42	25.04	4.79	8.16	13.19	17.59	1.28	12.97	28.54	3.89	5.68	11.53	25.1	0	26.89	15.95	0.79	7.69	19.25
RTa	2	2	a	2	f	11	0	11	0	0	0	1	0	0	0	1.18542	0	0	15.59	1.54	7.42	25.04	4.79	8.16	13.19	17.59	1.28	12.97	28.54	3.89	5.68	11.53	25.1	0	26.89	15.95	0.79	7.69	19.25
RTa	3	2	a	2	f	99	3	94	2	0	0.030303	0.949495	0.020202	0	0.335764	0.404599	0.241667	0	15.59	1.54	7.42	25.04	4.79	8.16	13.19	17.59	1.28	12.97	28.54	3.89	5.68	11.53	25.1	0	26.89	15.95	0.79	7.69	19.25
RTa	1	2	a	1	m					0									15.59	1.54	7.42	25.04	4.79	8.16	13.19	17.59	1.28	12.97	28.54	3.89	5.68	11.53	25.1	0	26.89	15.95	0.79	7.69	19.25
RTa	2	2	a	1	m	13	0	12	0	1	0	0.923077	0	0.0769231	0	0.324826	0	0.666667	15.59	1.54	7.42	25.04	4.79	8.16	13.19	17.59	1.28	12.97	28.54	3.89	5.68	11.53	25.1	0	26.89	15.95	0.79	7.69	19.25
RTa	3	2	a	1	m	121	1	114	5	1	0.00826446	0.942149	0.0413223	0.00826446	2.24167	0.427367	0.365	0.536458	15.59	1.54	7.42	25.04	4.79	8.16	13.19	17.59	1.28	12.97	28.54	3.89	5.68	11.53	25.1	0	26.89	15.95	0.79	7.69	19.25
SCa	1	2	a	2	f	26	0	25	0	1	0	0.961538	0	0.0384615	0	1.41063	0	26.8479	71.64	0.68	0.12	9.49	1.37	4.75	7.11	86.07	0	0.27	1.5	2.3	2.4	4.88	82.94	0	1.08	0	5.27	4.12	6.52
SCa	2	2	a	2	f	153	0	150	0	3	0	0.980392	0	0.0196078	0	0.952708	0	0.127778	71.64	0.68	0.12	9.49	1.37	4.75	7.11	86.07	0	0.27	1.5	2.3	2.4	4.88	82.94	0	1.08	0	5.27	4.12	6.52
SCa	3	2	a	2	f	79	0	70	5	4	0	0.886076	0.0632911	0.0506329	0	0.365804	0.959583	0.170052	71.64	0.68	0.12	9.49	1.37	4.75	7.11	86.07	0	0.27	1.5	2.3	2.4	4.88	82.94	0	1.08	0	5.27	4.12	6.52
SCa	1	2	a	1	m	30	0	19	11	0	0	0.633333	0.366667	0	0	1.33838	0.726989	0	71.64	0.68	0.12	9.49	1.37	4.75	7.11	86.07	0	0.27	1.5	2.3	2.4	4.88	82.94	0	1.08	0	5.27	4.12	6.52
SCa	2	2	a	1	m	119	0	106	6	7	0	0.890756	0.0504202	0.0588235	0	0.482134	2.28628	0.465179	71.64	0.68	0.12	9.49	1.37	4.75	7.11	86.07	0	0.27	1.5	2.3	2.4	4.88	82.94	0	1.08	0	5.27	4.12	6.52
SCa	3	2	a	1	m	45	0	43	1	1	0	0.955556	0.0222222	0.0222222	0	2.06594	0.0479167	0.184375	71.64	0.68	0.12	9.49	1.37	4.75	7.11	86.07	0	0.27	1.5	2.3	2.4	4.88	82.94	0	1.08	0	5.27	4.12	6.52
STc	1	1	c	2	f	214	0	189	25	0	0	0.883178	0.116822	0	0	1.21635	0.1745	0	25.36	4.93	1.6	35.99	11.4	4.76	4.05	21.3	6.15	2.44	39.27	15.37	5.16	6.58	46.01	3.77	6.57	19.35	18.27	4.95	0.16
STc	2	1	c	2	f	262	1	250	10	1	0.00381679	0.954198	0.0381679	0.00381679	0.327083	2.30723	0.0520833	0.221875	25.36	4.93	1.6	35.99	11.4	4.76	4.05	21.3	6.15	2.44	39.27	15.37	5.16	6.58	46.01	3.77	6.57	19.35	18.27	4.95	0.16
STc	3	1	c	2	f	71	0	68	1	2	0	0.957746	0.0140845	0.028169	0	2.23257	0.586458	1.6901	25.36	4.93	1.6	35.99	11.4	4.76	4.05	21.3	6.15	2.44	39.27	15.37	5.16	6.58	46.01	3.77	6.57	19.35	18.27	4.95	0.16
STc	1	1	c	1	m	150	0	127	23	0	0	0.846667	0.153333	0	0	0.75123	0.323732	0	25.36	4.93	1.6	35.99	11.4	4.76	4.05	21.3	6.15	2.44	39.27	15.37	5.16	6.58	46.01	3.77	6.57	19.35	18.27	4.95	0.16
STc	2	1	c	1	m	237	1	196	39	1	0.00421941	0.827004	0.164557	0.00421941	0.269792	1.03823	0.113568	0.254167	25.36	4.93	1.6	35.99	11.4	4.76	4.05	21.3	6.15	2.44	39.27	15.37	5.16	6.58	46.01	3.77	6.57	19.35	18.27	4.95	0.16
STc	3	1	c	1	m	73	0	66	5	2	0	0.90411	0.0684932	0.0273973	0	0.649511	0.92625	0.213021	25.36	4.93	1.6	35.99	11.4	4.76	4.05	21.3	6.15	2.44	39.27	15.37	5.16	6.58	46.01	3.77	6.57	19.35	18.27	4.95	0.16
TGa	1	2	a	2	f	16	8	1	7	0	0.5	0.0625	0.4375	0	4.38555	4.44167	1.70149	0	51.06	3.05	1.12	20.62	4.29	2.96	6.05	57.69	3.32	2.19	19.38	2.79	2.92	5.97	70.09	0.4	8.74	7.4	1.1	4.03	7.08
TGa	2	2	a	2	f	45	33	11	1	0	0.733333	0.244444	0.0222222	0	3.82049	0.588068	1.42813	0	51.06	3.05	1.12	20.62	4.29	2.96	6.05	57.69	3.32	2.19	19.38	2.79	2.92	5.97	70.09	0.4	8.74	7.4	1.1	4.03	7.08
TGa	3	2	a	2	f	55	31	22	2	0	0.563636	0.4	0.0363636	0	6.37779	0.43196	0.372917	0	51.06	3.05	1.12	20.62	4.29	2.96	6.05	57.69	3.32	2.19	19.38	2.79	2.92	5.97	70.09	0.4	8.74	7.4	1.1	4.03	7.08
TGa	1	2	a	1	m	6	2	0	4	0	0.333333	0	0.666667	0	0.385937	0	0.803385	0	51.06	3.05	1.12	20.62	4.29	2.96	6.05	57.69	3.32	2.19	19.38	2.79	2.92	5.97	70.09	0.4	8.74	7.4	1.1	4.03	7.08
TGa	2	2	a	1	m	23	1	15	6	1	0.0434783	0.652174	0.26087	0.0434783	0.477083	0.844306	1.75017	4.92708	51.06	3.05	1.12	20.62	4.29	2.96	6.05	57.69	3.32	2.19	19.38	2.79	2.92	5.97	70.09	0.4	8.74	7.4	1.1	4.03	7.08
TGa	3	2	a	1	m	59	3	39	11	6	0.0508475	0.661017	0.186441	0.101695	1.05937	0.604006	0.8375	4.93819	51.06	3.05	1.12	20.62	4.29	2.96	6.05	57.69	3.32	2.19	19.38	2.79	2.92	5.97	70.09	0.4	8.74	7.4	1.1	4.03	7.08
TGp	1	3	p	2	f	83	79	4	0	0	0.951807	0.0481928	0	0	1.71125	0.894271	0	0	48.05	1.97	1.07	24.64	2.19	3.26	6.97	52.6	2.12	2.4	21.64	2.53	3.53	6.05	53.85	0	9.62	23.73	2.04	2.07	3.49
TGp	2	3	p	2	f	136	102	34	0	0	0.75	0.25	0	0	4.01434	0.960539	0	0	48.05	1.97	1.07	24.64	2.19	3.26	6.97	52.6	2.12	2.4	21.64	2.53	3.53	6.05	53.85	0	9.62	23.73	2.04	2.07	3.49
TGp	3	3	p	2	f	91	44	43	1	3	0.483516	0.472527	0.010989	0.032967	2.56861	0.186652	0.120833	0.235069	48.05	1.97	1.07	24.64	2.19	3.26	6.97	52.6	2.12	2.4	21.64	2.53	3.53	6.05	53.85	0	9.62	23.73	2.04	2.07	3.49
TGp	1	3	p	1	m	30	17	13	0	0	0.566667	0.433333	0	0	0.267402	0.841266	0	0	48.05	1.97	1.07	24.64	2.19	3.26	6.97	52.6	2.12	2.4	21.64	2.53	3.53	6.05	53.85	0	9.62	23.73	2.04	2.07	3.49
TGp	2	3	p	1	m	82	10	70	1	1	0.121951	0.853659	0.0121951	0.0121951	0.245938	0.448006	0.758333	0.902083	48.05	1.97	1.07	24.64	2.19	3.26	6.97	52.6	2.12	2.4	21.64	2.53	3.53	6.05	53.85	0	9.62	23.73	2.04	2.07	3.49
TGp	3	3	p	1	m	74	18	53	0	3	0.243243	0.716216	0	0.0405405	0.90515	0.438915	0	0.582292	48.05	1.97	1.07	24.64	2.19	3.26	6.97	52.6	2.12	2.4	21.64	2.53	3.53	6.05	53.85	0	9.62	23.73	2.04	2.07	3.49
WEc	1	1	c	2	f	15	10	3	2	0	0.666667	0.2	0.133333	0	1.56812	0.913194	1.54271	0	58.21	2.07	0.26	19.3	5.49	4.5	4.86	72.44	0.5	0	14.25	3.56	3.38	3.59	76.29	0	0	7.4	2.9	4.29	5.46
WEc	2	1	c	2	f	83	50	16	16	1	0.60241	0.192771	0.192771	0.0120482	2.75738	0.166862	0.469271	0.113542	58.21	2.07	0.26	19.3	5.49	4.5	4.86	72.44	0.5	0	14.25	3.56	3.38	3.59	76.29	0	0	7.4	2.9	4.29	5.46
WEc	3	1	c	2	f	49	28	9	10	2	0.571429	0.183673	0.204082	0.0408163	2.57333	0.146875	1.78604	2.33177	58.21	2.07	0.26	19.3	5.49	4.5	4.86	72.44	0.5	0	14.25	3.56	3.38	3.59	76.29	0	0	7.4	2.9	4.29	5.46
WEc	1	1	c	1	m	31	7	2	22	0	0.225806	0.0645161	0.709677	0	2.19807	1.05052	1.06974	0	58.21	2.07	0.26	19.3	5.49	4.5	4.86	72.44	0.5	0	14.25	3.56	3.38	3.59	76.29	0	0	7.4	2.9	4.29	5.46
WEc	2	1	c	1	m	84	24	10	48	2	0.285714	0.119048	0.571429	0.0238095	1.52222	1.33042	1.15673	0.836979	58.21	2.07	0.26	19.3	5.49	4.5	4.86	72.44	0.5	0	14.25	3.56	3.38	3.59	76.29	0	0	7.4	2.9	4.29	5.46
WEc	3	1	c	1	m	78	18	17	35	8	0.230769	0.217949	0.448718	0.102564	0.8261	0.727083	2.52125	1.0388	58.21	2.07	0.26	19.3	5.49	4.5	4.86	72.44	0.5	0	14.25	3.56	3.38	3.59	76.29	0	0	7.4	2.9	4.29	5.46
WYc	1	1	c	2	f	83	0	61	22	0	0	0.73494	0.26506	0	0	2.22739	0.795644	0	3.51	0	1.17	39.61	2.49	34.16	14.86	4.4	0	2.48	44.56	0.84	36.5	9.27	4.12	0	4.87	49.83	0	27.51	10.1
WYc	2	1	c	2	f	137	2	113	21	1	0.0145985	0.824818	0.153285	0.00729927	3.57604	1.26751	0.298909	0.784375	3.51	0	1.17	39.61	2.49	34.16	14.86	4.4	0	2.48	44.56	0.84	36.5	9.27	4.12	0	4.87	49.83	0	27.51	10.1
WYc	3	1	c	2	f	73	0	49	24	0	0	0.671233	0.328767	0	0	0.899724	0.221615	0	3.51	0	1.17	39.61	2.49	34.16	14.86	4.4	0	2.48	44.56	0.84	36.5	9.27	4.12	0	4.87	49.83	0	27.51	10.1
WYc	1	1	c	1	m	115	0	42	73	0	0	0.365217	0.634783	0	0	1.01101	0.703282	0	3.51	0	1.17	39.61	2.49	34.16	14.86	4.4	0	2.48	44.56	0.84	36.5	9.27	4.12	0	4.87	49.83	0	27.51	10.1
WYc	2	1	c	1	m	186	1	92	91	2	0.00537634	0.494624	0.489247	0.0107527	0.422917	0.661243	0.633654	0.617188	3.51	0	1.17	39.61	2.49	34.16	14.86	4.4	0	2.48	44.56	0.84	36.5	9.27	4.12	0	4.87	49.83	0	27.51	10.1
WYc	3	1	c	1	m	68	0	39	27	2	0	0.573529	0.397059	0.0294118	0	1.32874	0.39456	27.3714	3.51	0	1.17	39.61	2.49	34.16	14.86	4.4	0	2.48	44.56	0.84	36.5	9.27	4.12	0	4.87	49.83	0	27.51	10.1

## Sheet: 2012 LS and pollen
no.	site	sitetrt	sitetrta	timetrt	timetrta	subset	x4	pctfield1500	pctforage1500	pctfruitveg1500	pctforest1500	pctgrassland1500	pcturban1500	pctturf1500	pctfield1000	pctforage1000	pctfruitveg1000	pctforest1000	pctgrassland1000	pcturban1000	pctturf1000	pctfield500	pctforage500	pctfruitveg500	pctforest500	pctgrassland500	pcturban500	pctturf500
98	BAa	2	a	4	T4	356	1424	42.72	0.13	4.33	13.89	5.56	12.64	9.44	51	0.29	1.43	13.93	7.05	8.56	8.53	59.55	0	0	20.56	7.38	6.68	5.56
99	BAa	2	a	4	T4	280	1120	42.72	0.13	4.33	13.89	5.56	12.64	9.44	51	0.29	1.43	13.93	7.05	8.56	8.53	59.55	0	0	20.56	7.38	6.68	5.56
100	BAa	2	a	4	T4	567	2268	42.72	0.13	4.33	13.89	5.56	12.64	9.44	51	0.29	1.43	13.93	7.05	8.56	8.53	59.55	0	0	20.56	7.38	6.68	5.56
101	BAa	2	a	4	T4	774	3096	42.72	0.13	4.33	13.89	5.56	12.64	9.44	51	0.29	1.43	13.93	7.05	8.56	8.53	59.55	0	0	20.56	7.38	6.68	5.56
102	BAa	2	a	4	T4	230	920	42.72	0.13	4.33	13.89	5.56	12.64	9.44	51	0.29	1.43	13.93	7.05	8.56	8.53	59.55	0	0	20.56	7.38	6.68	5.56
103	BAa	2	a	4	T4	316	1264	42.72	0.13	4.33	13.89	5.56	12.64	9.44	51	0.29	1.43	13.93	7.05	8.56	8.53	59.55	0	0	20.56	7.38	6.68	5.56
104	BAa	2	a	4	T4	316	1264	42.72	0.13	4.33	13.89	5.56	12.64	9.44	51	0.29	1.43	13.93	7.05	8.56	8.53	59.55	0	0	20.56	7.38	6.68	5.56
105	BAa	2	a	4	T4	405	1620	42.72	0.13	4.33	13.89	5.56	12.64	9.44	51	0.29	1.43	13.93	7.05	8.56	8.53	59.55	0	0	20.56	7.38	6.68	5.56
106	BAa	2	a	4	T4	514	2056	42.72	0.13	4.33	13.89	5.56	12.64	9.44	51	0.29	1.43	13.93	7.05	8.56	8.53	59.55	0	0	20.56	7.38	6.68	5.56
107	BAa	2	a	3	T3	239	956	42.72	0.13	4.33	13.89	5.56	12.64	9.44	51	0.29	1.43	13.93	7.05	8.56	8.53	59.55	0	0	20.56	7.38	6.68	5.56
108	BAa	2	a	3	T3	320	1280	42.72	0.13	4.33	13.89	5.56	12.64	9.44	51	0.29	1.43	13.93	7.05	8.56	8.53	59.55	0	0	20.56	7.38	6.68	5.56
109	BAa	2	a	3	T3	1013	4052	42.72	0.13	4.33	13.89	5.56	12.64	9.44	51	0.29	1.43	13.93	7.05	8.56	8.53	59.55	0	0	20.56	7.38	6.68	5.56
110	BAa	2	a	3	T3	455	1820	42.72	0.13	4.33	13.89	5.56	12.64	9.44	51	0.29	1.43	13.93	7.05	8.56	8.53	59.55	0	0	20.56	7.38	6.68	5.56
111	BAa	2	a	2	T2	297	1188	42.72	0.13	4.33	13.89	5.56	12.64	9.44	51	0.29	1.43	13.93	7.05	8.56	8.53	59.55	0	0	20.56	7.38	6.68	5.56
112	BAa	2	a	2	T2	196	784	42.72	0.13	4.33	13.89	5.56	12.64	9.44	51	0.29	1.43	13.93	7.05	8.56	8.53	59.55	0	0	20.56	7.38	6.68	5.56
113	BAa	2	a	2	T2	608	2432	42.72	0.13	4.33	13.89	5.56	12.64	9.44	51	0.29	1.43	13.93	7.05	8.56	8.53	59.55	0	0	20.56	7.38	6.68	5.56
114	BAa	2	a	2	T2	282	1128	42.72	0.13	4.33	13.89	5.56	12.64	9.44	51	0.29	1.43	13.93	7.05	8.56	8.53	59.55	0	0	20.56	7.38	6.68	5.56
115	BAa	2	a	2	T2	110	440	42.72	0.13	4.33	13.89	5.56	12.64	9.44	51	0.29	1.43	13.93	7.05	8.56	8.53	59.55	0	0	20.56	7.38	6.68	5.56
116	BAa	2	a	2	T2	39	156	42.72	0.13	4.33	13.89	5.56	12.64	9.44	51	0.29	1.43	13.93	7.05	8.56	8.53	59.55	0	0	20.56	7.38	6.68	5.56
117	BAa	2	a	1	T1	345	1380	42.72	0.13	4.33	13.89	5.56	12.64	9.44	51	0.29	1.43	13.93	7.05	8.56	8.53	59.55	0	0	20.56	7.38	6.68	5.56
118	BAa	2	a	1	T1	420	1680	42.72	0.13	4.33	13.89	5.56	12.64	9.44	51	0.29	1.43	13.93	7.05	8.56	8.53	59.55	0	0	20.56	7.38	6.68	5.56
119	BAa	2	a	1	T1	429	1716	42.72	0.13	4.33	13.89	5.56	12.64	9.44	51	0.29	1.43	13.93	7.05	8.56	8.53	59.55	0	0	20.56	7.38	6.68	5.56
120	BAa	2	a	1	T1	535	2140	42.72	0.13	4.33	13.89	5.56	12.64	9.44	51	0.29	1.43	13.93	7.05	8.56	8.53	59.55	0	0	20.56	7.38	6.68	5.56
121	BAa	2	a	1	T1	354	1416	42.72	0.13	4.33	13.89	5.56	12.64	9.44	51	0.29	1.43	13.93	7.05	8.56	8.53	59.55	0	0	20.56	7.38	6.68	5.56
164	FNc	1	c	4	T4	1553	6212	18.6521	5.96332	3.37159	35.4354	8.9664	3.30395	6.07156	10.8995	6.52574	7.5864	38.4193	10.5609	2.18592	7.1808	8.16871	19.7629	28.0252	29.2454	0.270054	0.348327	0
165	FNc	1	c	4	T4	1322	5288	18.6521	5.96332	3.37159	35.4354	8.9664	3.30395	6.07156	10.8995	6.52574	7.5864	38.4193	10.5609	2.18592	7.1808	8.16871	19.7629	28.0252	29.2454	0.270054	0.348327	0
166	FNc	1	c	4	T4	983	3932	18.6521	5.96332	3.37159	35.4354	8.9664	3.30395	6.07156	10.8995	6.52574	7.5864	38.4193	10.5609	2.18592	7.1808	8.16871	19.7629	28.0252	29.2454	0.270054	0.348327	0
167	FNc	1	c	4	T4	1189	4756	18.6521	5.96332	3.37159	35.4354	8.9664	3.30395	6.07156	10.8995	6.52574	7.5864	38.4193	10.5609	2.18592	7.1808	8.16871	19.7629	28.0252	29.2454	0.270054	0.348327	0
168	FNc	1	c	4	T4	922	3688	18.6521	5.96332	3.37159	35.4354	8.9664	3.30395	6.07156	10.8995	6.52574	7.5864	38.4193	10.5609	2.18592	7.1808	8.16871	19.7629	28.0252	29.2454	0.270054	0.348327	0
268	FWp	3	p	4	T4	2720	10880	36.7715	4.65981	2.65578	13.6742	10.3104	8.85573	3.9815	32.4529	7.90492	1.32733	12.0988	14.2028	12.3263	2.62896	17.8781	8.33912	4.2293	14.668	26.9247	24.4799	1.41707
269	FWp	3	p	1	T1	493	1972	36.7715	4.65981	2.65578	13.6742	10.3104	8.85573	3.9815	32.4529	7.90492	1.32733	12.0988	14.2028	12.3263	2.62896	17.8781	8.33912	4.2293	14.668	26.9247	24.4799	1.41707
270	FWp	3	p	1	T1	1047	4188	36.7715	4.65981	2.65578	13.6742	10.3104	8.85573	3.9815	32.4529	7.90492	1.32733	12.0988	14.2028	12.3263	2.62896	17.8781	8.33912	4.2293	14.668	26.9247	24.4799	1.41707
271	FWp	3	p	1	T1	787	3148	36.7715	4.65981	2.65578	13.6742	10.3104	8.85573	3.9815	32.4529	7.90492	1.32733	12.0988	14.2028	12.3263	2.62896	17.8781	8.33912	4.2293	14.668	26.9247	24.4799	1.41707
272	FWp	3	p	1	T1	276	1104	36.7715	4.65981	2.65578	13.6742	10.3104	8.85573	3.9815	32.4529	7.90492	1.32733	12.0988	14.2028	12.3263	2.62896	17.8781	8.33912	4.2293	14.668	26.9247	24.4799	1.41707
273	FWp	3	p	1	T1	885	3540	36.7715	4.65981	2.65578	13.6742	10.3104	8.85573	3.9815	32.4529	7.90492	1.32733	12.0988	14.2028	12.3263	2.62896	17.8781	8.33912	4.2293	14.668	26.9247	24.4799	1.41707
274	FWp	3	p	1	T1	1221	4884	36.7715	4.65981	2.65578	13.6742	10.3104	8.85573	3.9815	32.4529	7.90492	1.32733	12.0988	14.2028	12.3263	2.62896	17.8781	8.33912	4.2293	14.668	26.9247	24.4799	1.41707
59	JBa	2	a	4	T4	1699	6796	56.9539	0.798544	2.86631	11.5915	3.15884	8.56563	11.1127	67.2122	0	6.44949	5.02964	3.4994	4.08385	8.04009	64.4196	0	13.5965	0.960073	0	4.34106	0.851915
60	JBa	2	a	4	T4	1899	7596	56.9539	0.798544	2.86631	11.5915	3.15884	8.56563	11.1127	67.2122	0	6.44949	5.02964	3.4994	4.08385	8.04009	64.4196	0	13.5965	0.960073	0	4.34106	0.851915
61	JBa	2	a	4	T4	545	2180	56.9539	0.798544	2.86631	11.5915	3.15884	8.56563	11.1127	67.2122	0	6.44949	5.02964	3.4994	4.08385	8.04009	64.4196	0	13.5965	0.960073	0	4.34106	0.851915
62	JBa	2	a	4	T4	2280	9120	56.9539	0.798544	2.86631	11.5915	3.15884	8.56563	11.1127	67.2122	0	6.44949	5.02964	3.4994	4.08385	8.04009	64.4196	0	13.5965	0.960073	0	4.34106	0.851915
63	JBa	2	a	4	T4	1572	6288	56.9539	0.798544	2.86631	11.5915	3.15884	8.56563	11.1127	67.2122	0	6.44949	5.02964	3.4994	4.08385	8.04009	64.4196	0	13.5965	0.960073	0	4.34106	0.851915
64	JBa	2	a	3	T3	52	208	56.9539	0.798544	2.86631	11.5915	3.15884	8.56563	11.1127	67.2122	0	6.44949	5.02964	3.4994	4.08385	8.04009	64.4196	0	13.5965	0.960073	0	4.34106	0.851915
65	JBa	2	a	3	T3	34	136	56.9539	0.798544	2.86631	11.5915	3.15884	8.56563	11.1127	67.2122	0	6.44949	5.02964	3.4994	4.08385	8.04009	64.4196	0	13.5965	0.960073	0	4.34106	0.851915
66	JBa	2	a	3	T3	10	40	56.9539	0.798544	2.86631	11.5915	3.15884	8.56563	11.1127	67.2122	0	6.44949	5.02964	3.4994	4.08385	8.04009	64.4196	0	13.5965	0.960073	0	4.34106	0.851915
67	JBa	2	a	3	T3	103	412	56.9539	0.798544	2.86631	11.5915	3.15884	8.56563	11.1127	67.2122	0	6.44949	5.02964	3.4994	4.08385	8.04009	64.4196	0	13.5965	0.960073	0	4.34106	0.851915
68	JBa	2	a	3	T3	228	912	56.9539	0.798544	2.86631	11.5915	3.15884	8.56563	11.1127	67.2122	0	6.44949	5.02964	3.4994	4.08385	8.04009	64.4196	0	13.5965	0.960073	0	4.34106	0.851915
69	JBa	2	a	3	T3	125	500	56.9539	0.798544	2.86631	11.5915	3.15884	8.56563	11.1127	67.2122	0	6.44949	5.02964	3.4994	4.08385	8.04009	64.4196	0	13.5965	0.960073	0	4.34106	0.851915
70	JBa	2	a	2	T2	1203	4812	56.9539	0.798544	2.86631	11.5915	3.15884	8.56563	11.1127	67.2122	0	6.44949	5.02964	3.4994	4.08385	8.04009	64.4196	0	13.5965	0.960073	0	4.34106	0.851915
71	JBa	2	a	2	T2	774	3096	56.9539	0.798544	2.86631	11.5915	3.15884	8.56563	11.1127	67.2122	0	6.44949	5.02964	3.4994	4.08385	8.04009	64.4196	0	13.5965	0.960073	0	4.34106	0.851915
72	JBa	2	a	2	T2	665	2660	56.9539	0.798544	2.86631	11.5915	3.15884	8.56563	11.1127	67.2122	0	6.44949	5.02964	3.4994	4.08385	8.04009	64.4196	0	13.5965	0.960073	0	4.34106	0.851915
73	JBa	2	a	2	T2	1052	4208	56.9539	0.798544	2.86631	11.5915	3.15884	8.56563	11.1127	67.2122	0	6.44949	5.02964	3.4994	4.08385	8.04009	64.4196	0	13.5965	0.960073	0	4.34106	0.851915
74	JBa	2	a	2	T2	893	3572	56.9539	0.798544	2.86631	11.5915	3.15884	8.56563	11.1127	67.2122	0	6.44949	5.02964	3.4994	4.08385	8.04009	64.4196	0	13.5965	0.960073	0	4.34106	0.851915
75	JBa	2	a	2	T2	869	3476	56.9539	0.798544	2.86631	11.5915	3.15884	8.56563	11.1127	67.2122	0	6.44949	5.02964	3.4994	4.08385	8.04009	64.4196	0	13.5965	0.960073	0	4.34106	0.851915
76	JBa	2	a	1	T1	1627	6508	56.9539	0.798544	2.86631	11.5915	3.15884	8.56563	11.1127	67.2122	0	6.44949	5.02964	3.4994	4.08385	8.04009	64.4196	0	13.5965	0.960073	0	4.34106	0.851915
77	JBa	2	a	1	T1	1082	4328	56.9539	0.798544	2.86631	11.5915	3.15884	8.56563	11.1127	67.2122	0	6.44949	5.02964	3.4994	4.08385	8.04009	64.4196	0	13.5965	0.960073	0	4.34106	0.851915
78	JBa	2	a	1	T1	1537	6148	56.9539	0.798544	2.86631	11.5915	3.15884	8.56563	11.1127	67.2122	0	6.44949	5.02964	3.4994	4.08385	8.04009	64.4196	0	13.5965	0.960073	0	4.34106	0.851915
79	JBa	2	a	1	T1	1875	7500	56.9539	0.798544	2.86631	11.5915	3.15884	8.56563	11.1127	67.2122	0	6.44949	5.02964	3.4994	4.08385	8.04009	64.4196	0	13.5965	0.960073	0	4.34106	0.851915
80	JBa	2	a	1	T1	2263	9052	56.9539	0.798544	2.86631	11.5915	3.15884	8.56563	11.1127	67.2122	0	6.44949	5.02964	3.4994	4.08385	8.04009	64.4196	0	13.5965	0.960073	0	4.34106	0.851915
81	JBa	2	a	1	T1	1386	5544	56.9539	0.798544	2.86631	11.5915	3.15884	8.56563	11.1127	67.2122	0	6.44949	5.02964	3.4994	4.08385	8.04009	64.4196	0	13.5965	0.960073	0	4.34106	0.851915
82	JBp	3	p	4	T4	758	3032	62.1852	0.160687	2.51642	8.84795	2.68159	5.33019	9.06698	73.2323	0	5.66218	5.60717	0.836169	2.90409	5.15275	62.5663	0	21.5551	1.94452	0	0	0
83	JBp	3	p	4	T4	1183	4732	62.1852	0.160687	2.51642	8.84795	2.68159	5.33019	9.06698	73.2323	0	5.66218	5.60717	0.836169	2.90409	5.15275	62.5663	0	21.5551	1.94452	0	0	0
84	JBp	3	p	4	T4	142	568	62.1852	0.160687	2.51642	8.84795	2.68159	5.33019	9.06698	73.2323	0	5.66218	5.60717	0.836169	2.90409	5.15275	62.5663	0	21.5551	1.94452	0	0	0
85	JBp	3	p	4	T4	1808	7232	62.1852	0.160687	2.51642	8.84795	2.68159	5.33019	9.06698	73.2323	0	5.66218	5.60717	0.836169	2.90409	5.15275	62.5663	0	21.5551	1.94452	0	0	0
86	JBp	3	p	3	T3	147	588	62.1852	0.160687	2.51642	8.84795	2.68159	5.33019	9.06698	73.2323	0	5.66218	5.60717	0.836169	2.90409	5.15275	62.5663	0	21.5551	1.94452	0	0	0
87	JBp	3	p	3	T3	780	3120	62.1852	0.160687	2.51642	8.84795	2.68159	5.33019	9.06698	73.2323	0	5.66218	5.60717	0.836169	2.90409	5.15275	62.5663	0	21.5551	1.94452	0	0	0
88	JBp	3	p	3	T3	27	108	62.1852	0.160687	2.51642	8.84795	2.68159	5.33019	9.06698	73.2323	0	5.66218	5.60717	0.836169	2.90409	5.15275	62.5663	0	21.5551	1.94452	0	0	0
89	JBp	3	p	3	T3	69	276	62.1852	0.160687	2.51642	8.84795	2.68159	5.33019	9.06698	73.2323	0	5.66218	5.60717	0.836169	2.90409	5.15275	62.5663	0	21.5551	1.94452	0	0	0
90	JBp	3	p	2	T2	654	2616	62.1852	0.160687	2.51642	8.84795	2.68159	5.33019	9.06698	73.2323	0	5.66218	5.60717	0.836169	2.90409	5.15275	62.5663	0	21.5551	1.94452	0	0	0
91	JBp	3	p	2	T2	883	3532	62.1852	0.160687	2.51642	8.84795	2.68159	5.33019	9.06698	73.2323	0	5.66218	5.60717	0.836169	2.90409	5.15275	62.5663	0	21.5551	1.94452	0	0	0
92	JBp	3	p	2	T2	694	2776	62.1852	0.160687	2.51642	8.84795	2.68159	5.33019	9.06698	73.2323	0	5.66218	5.60717	0.836169	2.90409	5.15275	62.5663	0	21.5551	1.94452	0	0	0
93	JBp	3	p	2	T2	959	3836	62.1852	0.160687	2.51642	8.84795	2.68159	5.33019	9.06698	73.2323	0	5.66218	5.60717	0.836169	2.90409	5.15275	62.5663	0	21.5551	1.94452	0	0	0
94	JBp	3	p	1	T1	483	1932	62.1852	0.160687	2.51642	8.84795	2.68159	5.33019	9.06698	73.2323	0	5.66218	5.60717	0.836169	2.90409	5.15275	62.5663	0	21.5551	1.94452	0	0	0
95	JBp	3	p	1	T1	709	2836	62.1852	0.160687	2.51642	8.84795	2.68159	5.33019	9.06698	73.2323	0	5.66218	5.60717	0.836169	2.90409	5.15275	62.5663	0	21.5551	1.94452	0	0	0
96	JBp	3	p	1	T1	872	3488	62.1852	0.160687	2.51642	8.84795	2.68159	5.33019	9.06698	73.2323	0	5.66218	5.60717	0.836169	2.90409	5.15275	62.5663	0	21.5551	1.94452	0	0	0
97	JBp	3	p	1	T1	1038	4152	62.1852	0.160687	2.51642	8.84795	2.68159	5.33019	9.06698	73.2323	0	5.66218	5.60717	0.836169	2.90409	5.15275	62.5663	0	21.5551	1.94452	0	0	0
122	KGc	1	c	4	T4	916	3664	27.5782	0	4.60404	19.925	14.8593	9.38498	14.5499	37.1103	0	6.44531	16.0544	18.9126	9.79571	8.88149	54.1903	0	6.52258	6.40817	18.736	4.56362	4.44607
123	KGc	1	c	4	T4	863	3452	27.5782	0	4.60404	19.925	14.8593	9.38498	14.5499	37.1103	0	6.44531	16.0544	18.9126	9.79571	8.88149	54.1903	0	6.52258	6.40817	18.736	4.56362	4.44607
124	KGc	1	c	4	T4	1247	4988	27.5782	0	4.60404	19.925	14.8593	9.38498	14.5499	37.1103	0	6.44531	16.0544	18.9126	9.79571	8.88149	54.1903	0	6.52258	6.40817	18.736	4.56362	4.44607
125	KGc	1	c	4	T4	1692	6768	27.5782	0	4.60404	19.925	14.8593	9.38498	14.5499	37.1103	0	6.44531	16.0544	18.9126	9.79571	8.88149	54.1903	0	6.52258	6.40817	18.736	4.56362	4.44607
126	KGc	1	c	4	T4	720	2880	27.5782	0	4.60404	19.925	14.8593	9.38498	14.5499	37.1103	0	6.44531	16.0544	18.9126	9.79571	8.88149	54.1903	0	6.52258	6.40817	18.736	4.56362	4.44607
127	KGc	1	c	4	T4	407	1628	27.5782	0	4.60404	19.925	14.8593	9.38498	14.5499	37.1103	0	6.44531	16.0544	18.9126	9.79571	8.88149	54.1903	0	6.52258	6.40817	18.736	4.56362	4.44607
128	KGc	1	c	3	T3	1344	5376	27.5782	0	4.60404	19.925	14.8593	9.38498	14.5499	37.1103	0	6.44531	16.0544	18.9126	9.79571	8.88149	54.1903	0	6.52258	6.40817	18.736	4.56362	4.44607
129	KGc	1	c	3	T3	1036	4144	27.5782	0	4.60404	19.925	14.8593	9.38498	14.5499	37.1103	0	6.44531	16.0544	18.9126	9.79571	8.88149	54.1903	0	6.52258	6.40817	18.736	4.56362	4.44607
130	KGc	1	c	3	T3	1332	5328	27.5782	0	4.60404	19.925	14.8593	9.38498	14.5499	37.1103	0	6.44531	16.0544	18.9126	9.79571	8.88149	54.1903	0	6.52258	6.40817	18.736	4.56362	4.44607
131	KGc	1	c	3	T3	820	3280	27.5782	0	4.60404	19.925	14.8593	9.38498	14.5499	37.1103	0	6.44531	16.0544	18.9126	9.79571	8.88149	54.1903	0	6.52258	6.40817	18.736	4.56362	4.44607
132	KGc	1	c	2	T2	1273	5092	27.5782	0	4.60404	19.925	14.8593	9.38498	14.5499	37.1103	0	6.44531	16.0544	18.9126	9.79571	8.88149	54.1903	0	6.52258	6.40817	18.736	4.56362	4.44607
133	KGc	1	c	2	T2	1141	4564	27.5782	0	4.60404	19.925	14.8593	9.38498	14.5499	37.1103	0	6.44531	16.0544	18.9126	9.79571	8.88149	54.1903	0	6.52258	6.40817	18.736	4.56362	4.44607
134	KGc	1	c	2	T2	1417	5668	27.5782	0	4.60404	19.925	14.8593	9.38498	14.5499	37.1103	0	6.44531	16.0544	18.9126	9.79571	8.88149	54.1903	0	6.52258	6.40817	18.736	4.56362	4.44607
135	KGc	1	c	2	T2	1095	4380	27.5782	0	4.60404	19.925	14.8593	9.38498	14.5499	37.1103	0	6.44531	16.0544	18.9126	9.79571	8.88149	54.1903	0	6.52258	6.40817	18.736	4.56362	4.44607
136	KGc	1	c	1	T1	230	920	27.5782	0	4.60404	19.925	14.8593	9.38498	14.5499	37.1103	0	6.44531	16.0544	18.9126	9.79571	8.88149	54.1903	0	6.52258	6.40817	18.736	4.56362	4.44607
137	KGc	1	c	1	T1	151	604	27.5782	0	4.60404	19.925	14.8593	9.38498	14.5499	37.1103	0	6.44531	16.0544	18.9126	9.79571	8.88149	54.1903	0	6.52258	6.40817	18.736	4.56362	4.44607
138	KGc	1	c	1	T1	251	1004	27.5782	0	4.60404	19.925	14.8593	9.38498	14.5499	37.1103	0	6.44531	16.0544	18.9126	9.79571	8.88149	54.1903	0	6.52258	6.40817	18.736	4.56362	4.44607
139	KGc	1	c	1	T1	384	1536	27.5782	0	4.60404	19.925	14.8593	9.38498	14.5499	37.1103	0	6.44531	16.0544	18.9126	9.79571	8.88149	54.1903	0	6.52258	6.40817	18.736	4.56362	4.44607
140	KGc	1	c	1	T1	531	2124	27.5782	0	4.60404	19.925	14.8593	9.38498	14.5499	37.1103	0	6.44531	16.0544	18.9126	9.79571	8.88149	54.1903	0	6.52258	6.40817	18.736	4.56362	4.44607
141	KGc	1	c	1	T1	126	504	27.5782	0	4.60404	19.925	14.8593	9.38498	14.5499	37.1103	0	6.44531	16.0544	18.9126	9.79571	8.88149	54.1903	0	6.52258	6.40817	18.736	4.56362	4.44607
169	PKa	2	a	4	T4	1866	7464	12.8739	1.0767	0.0669964	46.1966	11.5178	12.9549	13.4157	20.4663	2.42269	0.150748	32.0377	11.741	19.1676	10.8118	21.6626	7.45914	0.603074	19.6066	4.25125	31.8457	5.17367
170	PKa	2	a	4	T4	3547	14188	12.8739	1.0767	0.0669964	46.1966	11.5178	12.9549	13.4157	20.4663	2.42269	0.150748	32.0377	11.741	19.1676	10.8118	21.6626	7.45914	0.603074	19.6066	4.25125	31.8457	5.17367
171	PKa	2	a	4	T4	1776	7104	12.8739	1.0767	0.0669964	46.1966	11.5178	12.9549	13.4157	20.4663	2.42269	0.150748	32.0377	11.741	19.1676	10.8118	21.6626	7.45914	0.603074	19.6066	4.25125	31.8457	5.17367
172	PKa	2	a	4	T4	1819	7276	12.8739	1.0767	0.0669964	46.1966	11.5178	12.9549	13.4157	20.4663	2.42269	0.150748	32.0377	11.741	19.1676	10.8118	21.6626	7.45914	0.603074	19.6066	4.25125	31.8457	5.17367
173	PKa	2	a	4	T4	993	3972	12.8739	1.0767	0.0669964	46.1966	11.5178	12.9549	13.4157	20.4663	2.42269	0.150748	32.0377	11.741	19.1676	10.8118	21.6626	7.45914	0.603074	19.6066	4.25125	31.8457	5.17367
174	PKa	2	a	4	T4	1293	5172	12.8739	1.0767	0.0669964	46.1966	11.5178	12.9549	13.4157	20.4663	2.42269	0.150748	32.0377	11.741	19.1676	10.8118	21.6626	7.45914	0.603074	19.6066	4.25125	31.8457	5.17367
175	PKa	2	a	3	T3	114	456	12.8739	1.0767	0.0669964	46.1966	11.5178	12.9549	13.4157	20.4663	2.42269	0.150748	32.0377	11.741	19.1676	10.8118	21.6626	7.45914	0.603074	19.6066	4.25125	31.8457	5.17367
176	PKa	2	a	3	T3	0	0	12.8739	1.0767	0.0669964	46.1966	11.5178	12.9549	13.4157	20.4663	2.42269	0.150748	32.0377	11.741	19.1676	10.8118	21.6626	7.45914	0.603074	19.6066	4.25125	31.8457	5.17367
177	PKa	2	a	3	T3	4	16	12.8739	1.0767	0.0669964	46.1966	11.5178	12.9549	13.4157	20.4663	2.42269	0.150748	32.0377	11.741	19.1676	10.8118	21.6626	7.45914	0.603074	19.6066	4.25125	31.8457	5.17367
178	PKa	2	a	3	T3	7	28	12.8739	1.0767	0.0669964	46.1966	11.5178	12.9549	13.4157	20.4663	2.42269	0.150748	32.0377	11.741	19.1676	10.8118	21.6626	7.45914	0.603074	19.6066	4.25125	31.8457	5.17367
179	PKa	2	a	3	T3	7	28	12.8739	1.0767	0.0669964	46.1966	11.5178	12.9549	13.4157	20.4663	2.42269	0.150748	32.0377	11.741	19.1676	10.8118	21.6626	7.45914	0.603074	19.6066	4.25125	31.8457	5.17367
180	PKa	2	a	3	T3	30	120	12.8739	1.0767	0.0669964	46.1966	11.5178	12.9549	13.4157	20.4663	2.42269	0.150748	32.0377	11.741	19.1676	10.8118	21.6626	7.45914	0.603074	19.6066	4.25125	31.8457	5.17367
181	PKa	2	a	2	T2	264	1056	12.8739	1.0767	0.0669964	46.1966	11.5178	12.9549	13.4157	20.4663	2.42269	0.150748	32.0377	11.741	19.1676	10.8118	21.6626	7.45914	0.603074	19.6066	4.25125	31.8457	5.17367
182	PKa	2	a	2	T2	1145	4580	12.8739	1.0767	0.0669964	46.1966	11.5178	12.9549	13.4157	20.4663	2.42269	0.150748	32.0377	11.741	19.1676	10.8118	21.6626	7.45914	0.603074	19.6066	4.25125	31.8457	5.17367
183	PKa	2	a	2	T2	71	284	12.8739	1.0767	0.0669964	46.1966	11.5178	12.9549	13.4157	20.4663	2.42269	0.150748	32.0377	11.741	19.1676	10.8118	21.6626	7.45914	0.603074	19.6066	4.25125	31.8457	5.17367
184	PKa	2	a	2	T2	46	184	12.8739	1.0767	0.0669964	46.1966	11.5178	12.9549	13.4157	20.4663	2.42269	0.150748	32.0377	11.741	19.1676	10.8118	21.6626	7.45914	0.603074	19.6066	4.25125	31.8457	5.17367
185	PKa	2	a	2	T2	145	580	12.8739	1.0767	0.0669964	46.1966	11.5178	12.9549	13.4157	20.4663	2.42269	0.150748	32.0377	11.741	19.1676	10.8118	21.6626	7.45914	0.603074	19.6066	4.25125	31.8457	5.17367
186	PKa	2	a	2	T2	142	568	12.8739	1.0767	0.0669964	46.1966	11.5178	12.9549	13.4157	20.4663	2.42269	0.150748	32.0377	11.741	19.1676	10.8118	21.6626	7.45914	0.603074	19.6066	4.25125	31.8457	5.17367
187	PKa	2	a	1	T1	1731	6924	12.8739	1.0767	0.0669964	46.1966	11.5178	12.9549	13.4157	20.4663	2.42269	0.150748	32.0377	11.741	19.1676	10.8118	21.6626	7.45914	0.603074	19.6066	4.25125	31.8457	5.17367
188	PKa	2	a	1	T1	1021	4084	12.8739	1.0767	0.0669964	46.1966	11.5178	12.9549	13.4157	20.4663	2.42269	0.150748	32.0377	11.741	19.1676	10.8118	21.6626	7.45914	0.603074	19.6066	4.25125	31.8457	5.17367
189	PKa	2	a	1	T1	908	3632	12.8739	1.0767	0.0669964	46.1966	11.5178	12.9549	13.4157	20.4663	2.42269	0.150748	32.0377	11.741	19.1676	10.8118	21.6626	7.45914	0.603074	19.6066	4.25125	31.8457	5.17367
190	PKa	2	a	1	T1	1526	6104	12.8739	1.0767	0.0669964	46.1966	11.5178	12.9549	13.4157	20.4663	2.42269	0.150748	32.0377	11.741	19.1676	10.8118	21.6626	7.45914	0.603074	19.6066	4.25125	31.8457	5.17367
191	PKa	2	a	1	T1	2457	9828	12.8739	1.0767	0.0669964	46.1966	11.5178	12.9549	13.4157	20.4663	2.42269	0.150748	32.0377	11.741	19.1676	10.8118	21.6626	7.45914	0.603074	19.6066	4.25125	31.8457	5.17367
192	PKa	2	a	1	T1	1650	6600	12.8739	1.0767	0.0669964	46.1966	11.5178	12.9549	13.4157	20.4663	2.42269	0.150748	32.0377	11.741	19.1676	10.8118	21.6626	7.45914	0.603074	19.6066	4.25125	31.8457	5.17367
193	PKp	3	p	4	T4	1182	4728	12.8739	1.0767	0.0669964	46.1966	11.5178	12.9549	13.4157	20.4663	2.42269	0.150748	32.0377	11.741	19.1676	10.8118	21.6626	7.45914	0.603074	19.6066	4.25125	31.8457	5.17367
194	PKp	3	p	4	T4	1062	4248	12.8739	1.0767	0.0669964	46.1966	11.5178	12.9549	13.4157	20.4663	2.42269	0.150748	32.0377	11.741	19.1676	10.8118	21.6626	7.45914	0.603074	19.6066	4.25125	31.8457	5.17367
195	PKp	3	p	4	T4	1009	4036	12.8739	1.0767	0.0669964	46.1966	11.5178	12.9549	13.4157	20.4663	2.42269	0.150748	32.0377	11.741	19.1676	10.8118	21.6626	7.45914	0.603074	19.6066	4.25125	31.8457	5.17367
196	PKp	3	p	4	T4	3009	12036	12.8739	1.0767	0.0669964	46.1966	11.5178	12.9549	13.4157	20.4663	2.42269	0.150748	32.0377	11.741	19.1676	10.8118	21.6626	7.45914	0.603074	19.6066	4.25125	31.8457	5.17367
197	PKp	3	p	4	T4	1048	4192	12.8739	1.0767	0.0669964	46.1966	11.5178	12.9549	13.4157	20.4663	2.42269	0.150748	32.0377	11.741	19.1676	10.8118	21.6626	7.45914	0.603074	19.6066	4.25125	31.8457	5.17367
198	PKp	3	p	4	T4	3238	12952	12.8739	1.0767	0.0669964	46.1966	11.5178	12.9549	13.4157	20.4663	2.42269	0.150748	32.0377	11.741	19.1676	10.8118	21.6626	7.45914	0.603074	19.6066	4.25125	31.8457	5.17367
199	PKp	3	p	4	T4	2134	8536	12.8739	1.0767	0.0669964	46.1966	11.5178	12.9549	13.4157	20.4663	2.42269	0.150748	32.0377	11.741	19.1676	10.8118	21.6626	7.45914	0.603074	19.6066	4.25125	31.8457	5.17367
200	PKp	3	p	3	T3	421	1684	12.8739	1.0767	0.0669964	46.1966	11.5178	12.9549	13.4157	20.4663	2.42269	0.150748	32.0377	11.741	19.1676	10.8118	21.6626	7.45914	0.603074	19.6066	4.25125	31.8457	5.17367
201	PKp	3	p	3	T3	409	1636	12.8739	1.0767	0.0669964	46.1966	11.5178	12.9549	13.4157	20.4663	2.42269	0.150748	32.0377	11.741	19.1676	10.8118	21.6626	7.45914	0.603074	19.6066	4.25125	31.8457	5.17367
202	PKp	3	p	3	T3	119	476	12.8739	1.0767	0.0669964	46.1966	11.5178	12.9549	13.4157	20.4663	2.42269	0.150748	32.0377	11.741	19.1676	10.8118	21.6626	7.45914	0.603074	19.6066	4.25125	31.8457	5.17367
203	PKp	3	p	3	T3	425	1700	12.8739	1.0767	0.0669964	46.1966	11.5178	12.9549	13.4157	20.4663	2.42269	0.150748	32.0377	11.741	19.1676	10.8118	21.6626	7.45914	0.603074	19.6066	4.25125	31.8457	5.17367
204	PKp	3	p	3	T3	336	1344	12.8739	1.0767	0.0669964	46.1966	11.5178	12.9549	13.4157	20.4663	2.42269	0.150748	32.0377	11.741	19.1676	10.8118	21.6626	7.45914	0.603074	19.6066	4.25125	31.8457	5.17367
205	PKp	3	p	3	T3	243	972	12.8739	1.0767	0.0669964	46.1966	11.5178	12.9549	13.4157	20.4663	2.42269	0.150748	32.0377	11.741	19.1676	10.8118	21.6626	7.45914	0.603074	19.6066	4.25125	31.8457	5.17367
206	PKp	3	p	2	T2	1640	6560	12.8739	1.0767	0.0669964	46.1966	11.5178	12.9549	13.4157	20.4663	2.42269	0.150748	32.0377	11.741	19.1676	10.8118	21.6626	7.45914	0.603074	19.6066	4.25125	31.8457	5.17367
207	PKp	3	p	2	T2	1544	6176	12.8739	1.0767	0.0669964	46.1966	11.5178	12.9549	13.4157	20.4663	2.42269	0.150748	32.0377	11.741	19.1676	10.8118	21.6626	7.45914	0.603074	19.6066	4.25125	31.8457	5.17367
208	PKp	3	p	2	T2	1650	6600	12.8739	1.0767	0.0669964	46.1966	11.5178	12.9549	13.4157	20.4663	2.42269	0.150748	32.0377	11.741	19.1676	10.8118	21.6626	7.45914	0.603074	19.6066	4.25125	31.8457	5.17367
209	PKp	3	p	2	T2	1181	4724	12.8739	1.0767	0.0669964	46.1966	11.5178	12.9549	13.4157	20.4663	2.42269	0.150748	32.0377	11.741	19.1676	10.8118	21.6626	7.45914	0.603074	19.6066	4.25125	31.8457	5.17367
210	PKp	3	p	2	T2	1724	6896	12.8739	1.0767	0.0669964	46.1966	11.5178	12.9549	13.4157	20.4663	2.42269	0.150748	32.0377	11.741	19.1676	10.8118	21.6626	7.45914	0.603074	19.6066	4.25125	31.8457	5.17367
211	PKp	3	p	2	T2	2345	9380	12.8739	1.0767	0.0669964	46.1966	11.5178	12.9549	13.4157	20.4663	2.42269	0.150748	32.0377	11.741	19.1676	10.8118	21.6626	7.45914	0.603074	19.6066	4.25125	31.8457	5.17367
212	PKp	3	p	1	T1	1443	5772	12.8739	1.0767	0.0669964	46.1966	11.5178	12.9549	13.4157	20.4663	2.42269	0.150748	32.0377	11.741	19.1676	10.8118	21.6626	7.45914	0.603074	19.6066	4.25125	31.8457	5.17367
213	PKp	3	p	1	T1	1770	7080	12.8739	1.0767	0.0669964	46.1966	11.5178	12.9549	13.4157	20.4663	2.42269	0.150748	32.0377	11.741	19.1676	10.8118	21.6626	7.45914	0.603074	19.6066	4.25125	31.8457	5.17367
214	PKp	3	p	1	T1	2683	10732	12.8739	1.0767	0.0669964	46.1966	11.5178	12.9549	13.4157	20.4663	2.42269	0.150748	32.0377	11.741	19.1676	10.8118	21.6626	7.45914	0.603074	19.6066	4.25125	31.8457	5.17367
215	PKp	3	p	1	T1	1156	4624	12.8739	1.0767	0.0669964	46.1966	11.5178	12.9549	13.4157	20.4663	2.42269	0.150748	32.0377	11.741	19.1676	10.8118	21.6626	7.45914	0.603074	19.6066	4.25125	31.8457	5.17367
216	PKp	3	p	1	T1	2685	10740	12.8739	1.0767	0.0669964	46.1966	11.5178	12.9549	13.4157	20.4663	2.42269	0.150748	32.0377	11.741	19.1676	10.8118	21.6626	7.45914	0.603074	19.6066	4.25125	31.8457	5.17367
217	PKp	3	p	1	T1	2329	9316	12.8739	1.0767	0.0669964	46.1966	11.5178	12.9549	13.4157	20.4663	2.42269	0.150748	32.0377	11.741	19.1676	10.8118	21.6626	7.45914	0.603074	19.6066	4.25125	31.8457	5.17367
142	RCc	1	c	4	T4	2765	11060	14.326	0.155082	4.59973	37.6999	7.97488	6.1776	17.9171	15.4714	0	7.16798	33.7918	6.94081	6.42941	16.4387	9.52637	0	15.6844	39.8526	4.16408	6.29076	9.1647
143	RCc	1	c	4	T4	993	3972	14.326	0.155082	4.59973	37.6999	7.97488	6.1776	17.9171	15.4714	0	7.16798	33.7918	6.94081	6.42941	16.4387	9.52637	0	15.6844	39.8526	4.16408	6.29076	9.1647
144	RCc	1	c	4	T4	2521	10084	14.326	0.155082	4.59973	37.6999	7.97488	6.1776	17.9171	15.4714	0	7.16798	33.7918	6.94081	6.42941	16.4387	9.52637	0	15.6844	39.8526	4.16408	6.29076	9.1647
145	RCc	1	c	4	T4	2115	8460	14.326	0.155082	4.59973	37.6999	7.97488	6.1776	17.9171	15.4714	0	7.16798	33.7918	6.94081	6.42941	16.4387	9.52637	0	15.6844	39.8526	4.16408	6.29076	9.1647
146	RCc	1	c	4	T4	3338	13352	14.326	0.155082	4.59973	37.6999	7.97488	6.1776	17.9171	15.4714	0	7.16798	33.7918	6.94081	6.42941	16.4387	9.52637	0	15.6844	39.8526	4.16408	6.29076	9.1647
147	RCc	1	c	4	T4	2262	9048	14.326	0.155082	4.59973	37.6999	7.97488	6.1776	17.9171	15.4714	0	7.16798	33.7918	6.94081	6.42941	16.4387	9.52637	0	15.6844	39.8526	4.16408	6.29076	9.1647
148	RCc	1	c	3	T3	378	1512	14.326	0.155082	4.59973	37.6999	7.97488	6.1776	17.9171	15.4714	0	7.16798	33.7918	6.94081	6.42941	16.4387	9.52637	0	15.6844	39.8526	4.16408	6.29076	9.1647
149	RCc	1	c	3	T3	423	1692	14.326	0.155082	4.59973	37.6999	7.97488	6.1776	17.9171	15.4714	0	7.16798	33.7918	6.94081	6.42941	16.4387	9.52637	0	15.6844	39.8526	4.16408	6.29076	9.1647
150	RCc	1	c	3	T3	376	1504	14.326	0.155082	4.59973	37.6999	7.97488	6.1776	17.9171	15.4714	0	7.16798	33.7918	6.94081	6.42941	16.4387	9.52637	0	15.6844	39.8526	4.16408	6.29076	9.1647
151	RCc	1	c	3	T3	174	696	14.326	0.155082	4.59973	37.6999	7.97488	6.1776	17.9171	15.4714	0	7.16798	33.7918	6.94081	6.42941	16.4387	9.52637	0	15.6844	39.8526	4.16408	6.29076	9.1647
152	RCc	1	c	3	T3	300	1200	14.326	0.155082	4.59973	37.6999	7.97488	6.1776	17.9171	15.4714	0	7.16798	33.7918	6.94081	6.42941	16.4387	9.52637	0	15.6844	39.8526	4.16408	6.29076	9.1647
153	RCc	1	c	3	T3	204	816	14.326	0.155082	4.59973	37.6999	7.97488	6.1776	17.9171	15.4714	0	7.16798	33.7918	6.94081	6.42941	16.4387	9.52637	0	15.6844	39.8526	4.16408	6.29076	9.1647
154	RCc	1	c	2	T2	1339	5356	14.326	0.155082	4.59973	37.6999	7.97488	6.1776	17.9171	15.4714	0	7.16798	33.7918	6.94081	6.42941	16.4387	9.52637	0	15.6844	39.8526	4.16408	6.29076	9.1647
155	RCc	1	c	2	T2	1808	7232	14.326	0.155082	4.59973	37.6999	7.97488	6.1776	17.9171	15.4714	0	7.16798	33.7918	6.94081	6.42941	16.4387	9.52637	0	15.6844	39.8526	4.16408	6.29076	9.1647
156	RCc	1	c	2	T2	1585	6340	14.326	0.155082	4.59973	37.6999	7.97488	6.1776	17.9171	15.4714	0	7.16798	33.7918	6.94081	6.42941	16.4387	9.52637	0	15.6844	39.8526	4.16408	6.29076	9.1647
157	RCc	1	c	2	T2	1301	5204	14.326	0.155082	4.59973	37.6999	7.97488	6.1776	17.9171	15.4714	0	7.16798	33.7918	6.94081	6.42941	16.4387	9.52637	0	15.6844	39.8526	4.16408	6.29076	9.1647
158	RCc	1	c	1	T1	1585	6340	14.326	0.155082	4.59973	37.6999	7.97488	6.1776	17.9171	15.4714	0	7.16798	33.7918	6.94081	6.42941	16.4387	9.52637	0	15.6844	39.8526	4.16408	6.29076	9.1647
159	RCc	1	c	1	T1	1696	6784	14.326	0.155082	4.59973	37.6999	7.97488	6.1776	17.9171	15.4714	0	7.16798	33.7918	6.94081	6.42941	16.4387	9.52637	0	15.6844	39.8526	4.16408	6.29076	9.1647
160	RCc	1	c	1	T1	1355	5420	14.326	0.155082	4.59973	37.6999	7.97488	6.1776	17.9171	15.4714	0	7.16798	33.7918	6.94081	6.42941	16.4387	9.52637	0	15.6844	39.8526	4.16408	6.29076	9.1647
161	RCc	1	c	1	T1	1968	7872	14.326	0.155082	4.59973	37.6999	7.97488	6.1776	17.9171	15.4714	0	7.16798	33.7918	6.94081	6.42941	16.4387	9.52637	0	15.6844	39.8526	4.16408	6.29076	9.1647
162	RCc	1	c	1	T1	1476	5904	14.326	0.155082	4.59973	37.6999	7.97488	6.1776	17.9171	15.4714	0	7.16798	33.7918	6.94081	6.42941	16.4387	9.52637	0	15.6844	39.8526	4.16408	6.29076	9.1647
163	RCc	1	c	1	T1	1466	5864	14.326	0.155082	4.59973	37.6999	7.97488	6.1776	17.9171	15.4714	0	7.16798	33.7918	6.94081	6.42941	16.4387	9.52637	0	15.6844	39.8526	4.16408	6.29076	9.1647
1	RTa	2	a	4	T4	1002	4008	15.5942	1.54369	7.42086	25.0362	4.7865	8.15751	13.1898	17.5861	1.27808	12.9679	28.5448	3.88907	5.67947	11.5275	25.0998	0	26.8922	15.9466	0.791512	7.68598	19.2541
2	RTa	2	a	4	T4	1170	4680	15.5942	1.54369	7.42086	25.0362	4.7865	8.15751	13.1898	17.5861	1.27808	12.9679	28.5448	3.88907	5.67947	11.5275	25.0998	0	26.8922	15.9466	0.791512	7.68598	19.2541
3	RTa	2	a	4	T4	586	2344	15.5942	1.54369	7.42086	25.0362	4.7865	8.15751	13.1898	17.5861	1.27808	12.9679	28.5448	3.88907	5.67947	11.5275	25.0998	0	26.8922	15.9466	0.791512	7.68598	19.2541
4	RTa	2	a	4	T4	769	3076	15.5942	1.54369	7.42086	25.0362	4.7865	8.15751	13.1898	17.5861	1.27808	12.9679	28.5448	3.88907	5.67947	11.5275	25.0998	0	26.8922	15.9466	0.791512	7.68598	19.2541
5	RTa	2	a	4	T4	1336	5344	15.5942	1.54369	7.42086	25.0362	4.7865	8.15751	13.1898	17.5861	1.27808	12.9679	28.5448	3.88907	5.67947	11.5275	25.0998	0	26.8922	15.9466	0.791512	7.68598	19.2541
6	RTa	2	a	4	T4	681	2724	15.5942	1.54369	7.42086	25.0362	4.7865	8.15751	13.1898	17.5861	1.27808	12.9679	28.5448	3.88907	5.67947	11.5275	25.0998	0	26.8922	15.9466	0.791512	7.68598	19.2541
7	RTa	2	a	3	T3	1045	4180	15.5942	1.54369	7.42086	25.0362	4.7865	8.15751	13.1898	17.5861	1.27808	12.9679	28.5448	3.88907	5.67947	11.5275	25.0998	0	26.8922	15.9466	0.791512	7.68598	19.2541
8	RTa	2	a	3	T3	1169	4676	15.5942	1.54369	7.42086	25.0362	4.7865	8.15751	13.1898	17.5861	1.27808	12.9679	28.5448	3.88907	5.67947	11.5275	25.0998	0	26.8922	15.9466	0.791512	7.68598	19.2541
9	RTa	2	a	3	T3	883	3532	15.5942	1.54369	7.42086	25.0362	4.7865	8.15751	13.1898	17.5861	1.27808	12.9679	28.5448	3.88907	5.67947	11.5275	25.0998	0	26.8922	15.9466	0.791512	7.68598	19.2541
10	RTa	2	a	3	T3	835	3340	15.5942	1.54369	7.42086	25.0362	4.7865	8.15751	13.1898	17.5861	1.27808	12.9679	28.5448	3.88907	5.67947	11.5275	25.0998	0	26.8922	15.9466	0.791512	7.68598	19.2541
11	RTa	2	a	3	T3	1002	4008	15.5942	1.54369	7.42086	25.0362	4.7865	8.15751	13.1898	17.5861	1.27808	12.9679	28.5448	3.88907	5.67947	11.5275	25.0998	0	26.8922	15.9466	0.791512	7.68598	19.2541
12	RTa	2	a	2	T2	1435	5740	15.5942	1.54369	7.42086	25.0362	4.7865	8.15751	13.1898	17.5861	1.27808	12.9679	28.5448	3.88907	5.67947	11.5275	25.0998	0	26.8922	15.9466	0.791512	7.68598	19.2541
13	RTa	2	a	2	T2	489	1956	15.5942	1.54369	7.42086	25.0362	4.7865	8.15751	13.1898	17.5861	1.27808	12.9679	28.5448	3.88907	5.67947	11.5275	25.0998	0	26.8922	15.9466	0.791512	7.68598	19.2541
14	RTa	2	a	2	T2	709	2836	15.5942	1.54369	7.42086	25.0362	4.7865	8.15751	13.1898	17.5861	1.27808	12.9679	28.5448	3.88907	5.67947	11.5275	25.0998	0	26.8922	15.9466	0.791512	7.68598	19.2541
15	RTa	2	a	2	T2	797	3188	15.5942	1.54369	7.42086	25.0362	4.7865	8.15751	13.1898	17.5861	1.27808	12.9679	28.5448	3.88907	5.67947	11.5275	25.0998	0	26.8922	15.9466	0.791512	7.68598	19.2541
16	RTa	2	a	2	T2	1590	6360	15.5942	1.54369	7.42086	25.0362	4.7865	8.15751	13.1898	17.5861	1.27808	12.9679	28.5448	3.88907	5.67947	11.5275	25.0998	0	26.8922	15.9466	0.791512	7.68598	19.2541
17	RTa	2	a	2	T2	2441	9764	15.5942	1.54369	7.42086	25.0362	4.7865	8.15751	13.1898	17.5861	1.27808	12.9679	28.5448	3.88907	5.67947	11.5275	25.0998	0	26.8922	15.9466	0.791512	7.68598	19.2541
18	RTa	2	a	2	T2	1826	7304	15.5942	1.54369	7.42086	25.0362	4.7865	8.15751	13.1898	17.5861	1.27808	12.9679	28.5448	3.88907	5.67947	11.5275	25.0998	0	26.8922	15.9466	0.791512	7.68598	19.2541
19	RTa	2	a	1	T1	7	28	15.5942	1.54369	7.42086	25.0362	4.7865	8.15751	13.1898	17.5861	1.27808	12.9679	28.5448	3.88907	5.67947	11.5275	25.0998	0	26.8922	15.9466	0.791512	7.68598	19.2541
20	RTa	2	a	1	T1	516	2064	15.5942	1.54369	7.42086	25.0362	4.7865	8.15751	13.1898	17.5861	1.27808	12.9679	28.5448	3.88907	5.67947	11.5275	25.0998	0	26.8922	15.9466	0.791512	7.68598	19.2541
21	RTa	2	a	1	T1	537	2148	15.5942	1.54369	7.42086	25.0362	4.7865	8.15751	13.1898	17.5861	1.27808	12.9679	28.5448	3.88907	5.67947	11.5275	25.0998	0	26.8922	15.9466	0.791512	7.68598	19.2541
22	RTa	2	a	1	T1	10	40	15.5942	1.54369	7.42086	25.0362	4.7865	8.15751	13.1898	17.5861	1.27808	12.9679	28.5448	3.88907	5.67947	11.5275	25.0998	0	26.8922	15.9466	0.791512	7.68598	19.2541
23	RTa	2	a	1	T1	6	24	15.5942	1.54369	7.42086	25.0362	4.7865	8.15751	13.1898	17.5861	1.27808	12.9679	28.5448	3.88907	5.67947	11.5275	25.0998	0	26.8922	15.9466	0.791512	7.68598	19.2541
275	SCa	2	a	4	T4	1093	4372	71.6351	0.684161	0.119578	9.49083	1.37141	4.7522	7.11079	86.0676	0	0.269062	1.50234	2.29646	2.39678	4.88493	82.943	0	1.07639	0	5.26987	4.11575	6.51854
276	SCa	2	a	4	T4	1920	7680	71.6351	0.684161	0.119578	9.49083	1.37141	4.7522	7.11079	86.0676	0	0.269062	1.50234	2.29646	2.39678	4.88493	82.943	0	1.07639	0	5.26987	4.11575	6.51854
277	SCa	2	a	4	T4	1149	4596	71.6351	0.684161	0.119578	9.49083	1.37141	4.7522	7.11079	86.0676	0	0.269062	1.50234	2.29646	2.39678	4.88493	82.943	0	1.07639	0	5.26987	4.11575	6.51854
278	SCa	2	a	4	T4	1269	5076	71.6351	0.684161	0.119578	9.49083	1.37141	4.7522	7.11079	86.0676	0	0.269062	1.50234	2.29646	2.39678	4.88493	82.943	0	1.07639	0	5.26987	4.11575	6.51854
279	SCa	2	a	4	T4	1349	5396	71.6351	0.684161	0.119578	9.49083	1.37141	4.7522	7.11079	86.0676	0	0.269062	1.50234	2.29646	2.39678	4.88493	82.943	0	1.07639	0	5.26987	4.11575	6.51854
280	SCa	2	a	4	T4	1856	7424	71.6351	0.684161	0.119578	9.49083	1.37141	4.7522	7.11079	86.0676	0	0.269062	1.50234	2.29646	2.39678	4.88493	82.943	0	1.07639	0	5.26987	4.11575	6.51854
281	SCa	2	a	3	T3	320	1280	71.6351	0.684161	0.119578	9.49083	1.37141	4.7522	7.11079	86.0676	0	0.269062	1.50234	2.29646	2.39678	4.88493	82.943	0	1.07639	0	5.26987	4.11575	6.51854
282	SCa	2	a	3	T3	474	1896	71.6351	0.684161	0.119578	9.49083	1.37141	4.7522	7.11079	86.0676	0	0.269062	1.50234	2.29646	2.39678	4.88493	82.943	0	1.07639	0	5.26987	4.11575	6.51854
283	SCa	2	a	3	T3	101	404	71.6351	0.684161	0.119578	9.49083	1.37141	4.7522	7.11079	86.0676	0	0.269062	1.50234	2.29646	2.39678	4.88493	82.943	0	1.07639	0	5.26987	4.11575	6.51854
284	SCa	2	a	3	T3	113	452	71.6351	0.684161	0.119578	9.49083	1.37141	4.7522	7.11079	86.0676	0	0.269062	1.50234	2.29646	2.39678	4.88493	82.943	0	1.07639	0	5.26987	4.11575	6.51854
285	SCa	2	a	3	T3	171	684	71.6351	0.684161	0.119578	9.49083	1.37141	4.7522	7.11079	86.0676	0	0.269062	1.50234	2.29646	2.39678	4.88493	82.943	0	1.07639	0	5.26987	4.11575	6.51854
286	SCa	2	a	3	T3	50	200	71.6351	0.684161	0.119578	9.49083	1.37141	4.7522	7.11079	86.0676	0	0.269062	1.50234	2.29646	2.39678	4.88493	82.943	0	1.07639	0	5.26987	4.11575	6.51854
287	SCa	2	a	2	T2	673	2692	71.6351	0.684161	0.119578	9.49083	1.37141	4.7522	7.11079	86.0676	0	0.269062	1.50234	2.29646	2.39678	4.88493	82.943	0	1.07639	0	5.26987	4.11575	6.51854
288	SCa	2	a	2	T2	385	1540	71.6351	0.684161	0.119578	9.49083	1.37141	4.7522	7.11079	86.0676	0	0.269062	1.50234	2.29646	2.39678	4.88493	82.943	0	1.07639	0	5.26987	4.11575	6.51854
289	SCa	2	a	2	T2	136	544	71.6351	0.684161	0.119578	9.49083	1.37141	4.7522	7.11079	86.0676	0	0.269062	1.50234	2.29646	2.39678	4.88493	82.943	0	1.07639	0	5.26987	4.11575	6.51854
290	SCa	2	a	2	T2	505	2020	71.6351	0.684161	0.119578	9.49083	1.37141	4.7522	7.11079	86.0676	0	0.269062	1.50234	2.29646	2.39678	4.88493	82.943	0	1.07639	0	5.26987	4.11575	6.51854
291	SCa	2	a	2	T2	621	2484	71.6351	0.684161	0.119578	9.49083	1.37141	4.7522	7.11079	86.0676	0	0.269062	1.50234	2.29646	2.39678	4.88493	82.943	0	1.07639	0	5.26987	4.11575	6.51854
292	SCa	2	a	2	T2	518	2072	71.6351	0.684161	0.119578	9.49083	1.37141	4.7522	7.11079	86.0676	0	0.269062	1.50234	2.29646	2.39678	4.88493	82.943	0	1.07639	0	5.26987	4.11575	6.51854
293	SCa	2	a	1	T1	1097	4388	71.6351	0.684161	0.119578	9.49083	1.37141	4.7522	7.11079	86.0676	0	0.269062	1.50234	2.29646	2.39678	4.88493	82.943	0	1.07639	0	5.26987	4.11575	6.51854
294	SCa	2	a	1	T1	602	2408	71.6351	0.684161	0.119578	9.49083	1.37141	4.7522	7.11079	86.0676	0	0.269062	1.50234	2.29646	2.39678	4.88493	82.943	0	1.07639	0	5.26987	4.11575	6.51854
295	SCa	2	a	1	T1	602	2408	71.6351	0.684161	0.119578	9.49083	1.37141	4.7522	7.11079	86.0676	0	0.269062	1.50234	2.29646	2.39678	4.88493	82.943	0	1.07639	0	5.26987	4.11575	6.51854
296	SCa	2	a	1	T1	723	2892	71.6351	0.684161	0.119578	9.49083	1.37141	4.7522	7.11079	86.0676	0	0.269062	1.50234	2.29646	2.39678	4.88493	82.943	0	1.07639	0	5.26987	4.11575	6.51854
297	SCa	2	a	1	T1	850	3400	71.6351	0.684161	0.119578	9.49083	1.37141	4.7522	7.11079	86.0676	0	0.269062	1.50234	2.29646	2.39678	4.88493	82.943	0	1.07639	0	5.26987	4.11575	6.51854
298	SCa	2	a	1	T1	976	3904	71.6351	0.684161	0.119578	9.49083	1.37141	4.7522	7.11079	86.0676	0	0.269062	1.50234	2.29646	2.39678	4.88493	82.943	0	1.07639	0	5.26987	4.11575	6.51854
299	STc	1	c	4	T4	2254	9016	25.3625	4.93479	1.5968	35.9908	11.399	4.75913	4.05034	21.2992	6.15273	2.4424	39.2711	15.3736	5.16251	6.57888	46.0077	3.76815	6.56695	19.3475	18.2687	4.95073	0.162651
300	STc	1	c	4	T4	2296	9184	25.3625	4.93479	1.5968	35.9908	11.399	4.75913	4.05034	21.2992	6.15273	2.4424	39.2711	15.3736	5.16251	6.57888	46.0077	3.76815	6.56695	19.3475	18.2687	4.95073	0.162651
301	STc	1	c	4	T4	2320	9280	25.3625	4.93479	1.5968	35.9908	11.399	4.75913	4.05034	21.2992	6.15273	2.4424	39.2711	15.3736	5.16251	6.57888	46.0077	3.76815	6.56695	19.3475	18.2687	4.95073	0.162651
302	STc	1	c	4	T4	3273	13092	25.3625	4.93479	1.5968	35.9908	11.399	4.75913	4.05034	21.2992	6.15273	2.4424	39.2711	15.3736	5.16251	6.57888	46.0077	3.76815	6.56695	19.3475	18.2687	4.95073	0.162651
303	STc	1	c	4	T4	2160	8640	25.3625	4.93479	1.5968	35.9908	11.399	4.75913	4.05034	21.2992	6.15273	2.4424	39.2711	15.3736	5.16251	6.57888	46.0077	3.76815	6.56695	19.3475	18.2687	4.95073	0.162651
304	STc	1	c	4	T4	1110	4440	25.3625	4.93479	1.5968	35.9908	11.399	4.75913	4.05034	21.2992	6.15273	2.4424	39.2711	15.3736	5.16251	6.57888	46.0077	3.76815	6.56695	19.3475	18.2687	4.95073	0.162651
305	STc	1	c	3	T3	21	84	25.3625	4.93479	1.5968	35.9908	11.399	4.75913	4.05034	21.2992	6.15273	2.4424	39.2711	15.3736	5.16251	6.57888	46.0077	3.76815	6.56695	19.3475	18.2687	4.95073	0.162651
306	STc	1	c	3	T3	25	100	25.3625	4.93479	1.5968	35.9908	11.399	4.75913	4.05034	21.2992	6.15273	2.4424	39.2711	15.3736	5.16251	6.57888	46.0077	3.76815	6.56695	19.3475	18.2687	4.95073	0.162651
307	STc	1	c	3	T3	118	472	25.3625	4.93479	1.5968	35.9908	11.399	4.75913	4.05034	21.2992	6.15273	2.4424	39.2711	15.3736	5.16251	6.57888	46.0077	3.76815	6.56695	19.3475	18.2687	4.95073	0.162651
308	STc	1	c	3	T3	108	432	25.3625	4.93479	1.5968	35.9908	11.399	4.75913	4.05034	21.2992	6.15273	2.4424	39.2711	15.3736	5.16251	6.57888	46.0077	3.76815	6.56695	19.3475	18.2687	4.95073	0.162651
309	STc	1	c	3	T3	65	260	25.3625	4.93479	1.5968	35.9908	11.399	4.75913	4.05034	21.2992	6.15273	2.4424	39.2711	15.3736	5.16251	6.57888	46.0077	3.76815	6.56695	19.3475	18.2687	4.95073	0.162651
310	STc	1	c	3	T3	81	324	25.3625	4.93479	1.5968	35.9908	11.399	4.75913	4.05034	21.2992	6.15273	2.4424	39.2711	15.3736	5.16251	6.57888	46.0077	3.76815	6.56695	19.3475	18.2687	4.95073	0.162651
311	STc	1	c	2	T2	655	2620	25.3625	4.93479	1.5968	35.9908	11.399	4.75913	4.05034	21.2992	6.15273	2.4424	39.2711	15.3736	5.16251	6.57888	46.0077	3.76815	6.56695	19.3475	18.2687	4.95073	0.162651
312	STc	1	c	2	T2	546	2184	25.3625	4.93479	1.5968	35.9908	11.399	4.75913	4.05034	21.2992	6.15273	2.4424	39.2711	15.3736	5.16251	6.57888	46.0077	3.76815	6.56695	19.3475	18.2687	4.95073	0.162651
313	STc	1	c	2	T2	850	3400	25.3625	4.93479	1.5968	35.9908	11.399	4.75913	4.05034	21.2992	6.15273	2.4424	39.2711	15.3736	5.16251	6.57888	46.0077	3.76815	6.56695	19.3475	18.2687	4.95073	0.162651
314	STc	1	c	2	T2	591	2364	25.3625	4.93479	1.5968	35.9908	11.399	4.75913	4.05034	21.2992	6.15273	2.4424	39.2711	15.3736	5.16251	6.57888	46.0077	3.76815	6.56695	19.3475	18.2687	4.95073	0.162651
315	STc	1	c	2	T2	760	3040	25.3625	4.93479	1.5968	35.9908	11.399	4.75913	4.05034	21.2992	6.15273	2.4424	39.2711	15.3736	5.16251	6.57888	46.0077	3.76815	6.56695	19.3475	18.2687	4.95073	0.162651
316	STc	1	c	2	T2	645	2580	25.3625	4.93479	1.5968	35.9908	11.399	4.75913	4.05034	21.2992	6.15273	2.4424	39.2711	15.3736	5.16251	6.57888	46.0077	3.76815	6.56695	19.3475	18.2687	4.95073	0.162651
317	STc	1	c	1	T1	884	3536	25.3625	4.93479	1.5968	35.9908	11.399	4.75913	4.05034	21.2992	6.15273	2.4424	39.2711	15.3736	5.16251	6.57888	46.0077	3.76815	6.56695	19.3475	18.2687	4.95073	0.162651
318	STc	1	c	1	T1	2037	8148	25.3625	4.93479	1.5968	35.9908	11.399	4.75913	4.05034	21.2992	6.15273	2.4424	39.2711	15.3736	5.16251	6.57888	46.0077	3.76815	6.56695	19.3475	18.2687	4.95073	0.162651
319	STc	1	c	1	T1	2929	11716	25.3625	4.93479	1.5968	35.9908	11.399	4.75913	4.05034	21.2992	6.15273	2.4424	39.2711	15.3736	5.16251	6.57888	46.0077	3.76815	6.56695	19.3475	18.2687	4.95073	0.162651
320	STc	1	c	1	T1	2765	11060	25.3625	4.93479	1.5968	35.9908	11.399	4.75913	4.05034	21.2992	6.15273	2.4424	39.2711	15.3736	5.16251	6.57888	46.0077	3.76815	6.56695	19.3475	18.2687	4.95073	0.162651
321	STc	1	c	1	T1	1797	7188	25.3625	4.93479	1.5968	35.9908	11.399	4.75913	4.05034	21.2992	6.15273	2.4424	39.2711	15.3736	5.16251	6.57888	46.0077	3.76815	6.56695	19.3475	18.2687	4.95073	0.162651
322	STc	1	c	1	T1	3082	12328	25.3625	4.93479	1.5968	35.9908	11.399	4.75913	4.05034	21.2992	6.15273	2.4424	39.2711	15.3736	5.16251	6.57888	46.0077	3.76815	6.56695	19.3475	18.2687	4.95073	0.162651
51	TGa	2	a	4	T4	444	1776	51.0566	3.0474	1.12259	20.6169	4.29248	2.96032	6.04701	57.6895	3.31582	2.19251	19.3846	2.79166	2.92421	5.97492	70.0932	0.400406	8.7414	7.39517	1.10237	4.02753	7.08269
52	TGa	2	a	4	T4	452	1808	51.0566	3.0474	1.12259	20.6169	4.29248	2.96032	6.04701	57.6895	3.31582	2.19251	19.3846	2.79166	2.92421	5.97492	70.0932	0.400406	8.7414	7.39517	1.10237	4.02753	7.08269
53	TGa	2	a	4	T4	873	3492	51.0566	3.0474	1.12259	20.6169	4.29248	2.96032	6.04701	57.6895	3.31582	2.19251	19.3846	2.79166	2.92421	5.97492	70.0932	0.400406	8.7414	7.39517	1.10237	4.02753	7.08269
54	TGa	2	a	4	T4	943	3772	51.0566	3.0474	1.12259	20.6169	4.29248	2.96032	6.04701	57.6895	3.31582	2.19251	19.3846	2.79166	2.92421	5.97492	70.0932	0.400406	8.7414	7.39517	1.10237	4.02753	7.08269
55	TGa	2	a	4	T4	710	2840	51.0566	3.0474	1.12259	20.6169	4.29248	2.96032	6.04701	57.6895	3.31582	2.19251	19.3846	2.79166	2.92421	5.97492	70.0932	0.400406	8.7414	7.39517	1.10237	4.02753	7.08269
56	TGa	2	a	4	T4	134	536	51.0566	3.0474	1.12259	20.6169	4.29248	2.96032	6.04701	57.6895	3.31582	2.19251	19.3846	2.79166	2.92421	5.97492	70.0932	0.400406	8.7414	7.39517	1.10237	4.02753	7.08269
57	TGa	2	a	2	T2	81	324	51.0566	3.0474	1.12259	20.6169	4.29248	2.96032	6.04701	57.6895	3.31582	2.19251	19.3846	2.79166	2.92421	5.97492	70.0932	0.400406	8.7414	7.39517	1.10237	4.02753	7.08269
58	TGa	2	a	2	T2	434	1736	51.0566	3.0474	1.12259	20.6169	4.29248	2.96032	6.04701	57.6895	3.31582	2.19251	19.3846	2.79166	2.92421	5.97492	70.0932	0.400406	8.7414	7.39517	1.10237	4.02753	7.08269
24	TGp	3	p	4	T4	1050	4200	48.0516	1.97144	1.0683	24.6429	2.1914	3.26499	6.96865	52.6031	2.12286	2.40378	21.6379	2.53403	3.52558	6.0534	53.8545	0	9.61639	23.7299	2.04026	2.07	3.48753
25	TGp	3	p	4	T4	570	2280	48.0516	1.97144	1.0683	24.6429	2.1914	3.26499	6.96865	52.6031	2.12286	2.40378	21.6379	2.53403	3.52558	6.0534	53.8545	0	9.61639	23.7299	2.04026	2.07	3.48753
26	TGp	3	p	4	T4	1287	5148	48.0516	1.97144	1.0683	24.6429	2.1914	3.26499	6.96865	52.6031	2.12286	2.40378	21.6379	2.53403	3.52558	6.0534	53.8545	0	9.61639	23.7299	2.04026	2.07	3.48753
27	TGp	3	p	4	T4	124	496	48.0516	1.97144	1.0683	24.6429	2.1914	3.26499	6.96865	52.6031	2.12286	2.40378	21.6379	2.53403	3.52558	6.0534	53.8545	0	9.61639	23.7299	2.04026	2.07	3.48753
28	TGp	3	p	4	T4	710	2840	48.0516	1.97144	1.0683	24.6429	2.1914	3.26499	6.96865	52.6031	2.12286	2.40378	21.6379	2.53403	3.52558	6.0534	53.8545	0	9.61639	23.7299	2.04026	2.07	3.48753
29	TGp	3	p	4	T4	133	532	48.0516	1.97144	1.0683	24.6429	2.1914	3.26499	6.96865	52.6031	2.12286	2.40378	21.6379	2.53403	3.52558	6.0534	53.8545	0	9.61639	23.7299	2.04026	2.07	3.48753
30	TGp	3	p	4	T4	643	2572	48.0516	1.97144	1.0683	24.6429	2.1914	3.26499	6.96865	52.6031	2.12286	2.40378	21.6379	2.53403	3.52558	6.0534	53.8545	0	9.61639	23.7299	2.04026	2.07	3.48753
31	TGp	3	p	4	T4	725	2900	48.0516	1.97144	1.0683	24.6429	2.1914	3.26499	6.96865	52.6031	2.12286	2.40378	21.6379	2.53403	3.52558	6.0534	53.8545	0	9.61639	23.7299	2.04026	2.07	3.48753
32	TGp	3	p	4	T4	548	2192	48.0516	1.97144	1.0683	24.6429	2.1914	3.26499	6.96865	52.6031	2.12286	2.40378	21.6379	2.53403	3.52558	6.0534	53.8545	0	9.61639	23.7299	2.04026	2.07	3.48753
33	TGp	3	p	3	T3	699	2796	48.0516	1.97144	1.0683	24.6429	2.1914	3.26499	6.96865	52.6031	2.12286	2.40378	21.6379	2.53403	3.52558	6.0534	53.8545	0	9.61639	23.7299	2.04026	2.07	3.48753
34	TGp	3	p	3	T3	360	1440	48.0516	1.97144	1.0683	24.6429	2.1914	3.26499	6.96865	52.6031	2.12286	2.40378	21.6379	2.53403	3.52558	6.0534	53.8545	0	9.61639	23.7299	2.04026	2.07	3.48753
35	TGp	3	p	3	T3	744	2976	48.0516	1.97144	1.0683	24.6429	2.1914	3.26499	6.96865	52.6031	2.12286	2.40378	21.6379	2.53403	3.52558	6.0534	53.8545	0	9.61639	23.7299	2.04026	2.07	3.48753
36	TGp	3	p	3	T3	407	1628	48.0516	1.97144	1.0683	24.6429	2.1914	3.26499	6.96865	52.6031	2.12286	2.40378	21.6379	2.53403	3.52558	6.0534	53.8545	0	9.61639	23.7299	2.04026	2.07	3.48753
37	TGp	3	p	3	T3	375	1500	48.0516	1.97144	1.0683	24.6429	2.1914	3.26499	6.96865	52.6031	2.12286	2.40378	21.6379	2.53403	3.52558	6.0534	53.8545	0	9.61639	23.7299	2.04026	2.07	3.48753
38	TGp	3	p	3	T3	375	1500	48.0516	1.97144	1.0683	24.6429	2.1914	3.26499	6.96865	52.6031	2.12286	2.40378	21.6379	2.53403	3.52558	6.0534	53.8545	0	9.61639	23.7299	2.04026	2.07	3.48753
39	TGp	3	p	3	T3	338	1352	48.0516	1.97144	1.0683	24.6429	2.1914	3.26499	6.96865	52.6031	2.12286	2.40378	21.6379	2.53403	3.52558	6.0534	53.8545	0	9.61639	23.7299	2.04026	2.07	3.48753
40	TGp	3	p	2	T2	1088	4352	48.0516	1.97144	1.0683	24.6429	2.1914	3.26499	6.96865	52.6031	2.12286	2.40378	21.6379	2.53403	3.52558	6.0534	53.8545	0	9.61639	23.7299	2.04026	2.07	3.48753
41	TGp	3	p	2	T2	877	3508	48.0516	1.97144	1.0683	24.6429	2.1914	3.26499	6.96865	52.6031	2.12286	2.40378	21.6379	2.53403	3.52558	6.0534	53.8545	0	9.61639	23.7299	2.04026	2.07	3.48753
42	TGp	3	p	2	T2	478	1912	48.0516	1.97144	1.0683	24.6429	2.1914	3.26499	6.96865	52.6031	2.12286	2.40378	21.6379	2.53403	3.52558	6.0534	53.8545	0	9.61639	23.7299	2.04026	2.07	3.48753
43	TGp	3	p	2	T2	789	3156	48.0516	1.97144	1.0683	24.6429	2.1914	3.26499	6.96865	52.6031	2.12286	2.40378	21.6379	2.53403	3.52558	6.0534	53.8545	0	9.61639	23.7299	2.04026	2.07	3.48753
44	TGp	3	p	2	T2	591	2364	48.0516	1.97144	1.0683	24.6429	2.1914	3.26499	6.96865	52.6031	2.12286	2.40378	21.6379	2.53403	3.52558	6.0534	53.8545	0	9.61639	23.7299	2.04026	2.07	3.48753
45	TGp	3	p	2	T2	335	1340	48.0516	1.97144	1.0683	24.6429	2.1914	3.26499	6.96865	52.6031	2.12286	2.40378	21.6379	2.53403	3.52558	6.0534	53.8545	0	9.61639	23.7299	2.04026	2.07	3.48753
46	TGp	3	p	1	T1	200	800	48.0516	1.97144	1.0683	24.6429	2.1914	3.26499	6.96865	52.6031	2.12286	2.40378	21.6379	2.53403	3.52558	6.0534	53.8545	0	9.61639	23.7299	2.04026	2.07	3.48753
47	TGp	3	p	1	T1	578	2312	48.0516	1.97144	1.0683	24.6429	2.1914	3.26499	6.96865	52.6031	2.12286	2.40378	21.6379	2.53403	3.52558	6.0534	53.8545	0	9.61639	23.7299	2.04026	2.07	3.48753
48	TGp	3	p	1	T1	429	1716	48.0516	1.97144	1.0683	24.6429	2.1914	3.26499	6.96865	52.6031	2.12286	2.40378	21.6379	2.53403	3.52558	6.0534	53.8545	0	9.61639	23.7299	2.04026	2.07	3.48753
49	TGp	3	p	1	T1	154	616	48.0516	1.97144	1.0683	24.6429	2.1914	3.26499	6.96865	52.6031	2.12286	2.40378	21.6379	2.53403	3.52558	6.0534	53.8545	0	9.61639	23.7299	2.04026	2.07	3.48753
50	TGp	3	p	1	T1	338	1352	48.0516	1.97144	1.0683	24.6429	2.1914	3.26499	6.96865	52.6031	2.12286	2.40378	21.6379	2.53403	3.52558	6.0534	53.8545	0	9.61639	23.7299	2.04026	2.07	3.48753
218	WEc	1	c	4	T4	453	1812	58.2123	2.07027	0.255078	19.299	5.49193	4.49773	4.85784	72.4415	0.501118	0	14.2533	3.55812	3.37586	3.58817	76.2872	0	0	7.39761	2.89869	4.28601	5.46357
219	WEc	1	c	4	T4	458	1832	58.2123	2.07027	0.255078	19.299	5.49193	4.49773	4.85784	72.4415	0.501118	0	14.2533	3.55812	3.37586	3.58817	76.2872	0	0	7.39761	2.89869	4.28601	5.46357
220	WEc	1	c	4	T4	820	3280	58.2123	2.07027	0.255078	19.299	5.49193	4.49773	4.85784	72.4415	0.501118	0	14.2533	3.55812	3.37586	3.58817	76.2872	0	0	7.39761	2.89869	4.28601	5.46357
221	WEc	1	c	4	T4	352	1408	58.2123	2.07027	0.255078	19.299	5.49193	4.49773	4.85784	72.4415	0.501118	0	14.2533	3.55812	3.37586	3.58817	76.2872	0	0	7.39761	2.89869	4.28601	5.46357
222	WEc	1	c	4	T4	0	0	58.2123	2.07027	0.255078	19.299	5.49193	4.49773	4.85784	72.4415	0.501118	0	14.2533	3.55812	3.37586	3.58817	76.2872	0	0	7.39761	2.89869	4.28601	5.46357
223	WEc	1	c	4	T4	420	1680	58.2123	2.07027	0.255078	19.299	5.49193	4.49773	4.85784	72.4415	0.501118	0	14.2533	3.55812	3.37586	3.58817	76.2872	0	0	7.39761	2.89869	4.28601	5.46357
224	WEc	1	c	4	T4	527	2108	58.2123	2.07027	0.255078	19.299	5.49193	4.49773	4.85784	72.4415	0.501118	0	14.2533	3.55812	3.37586	3.58817	76.2872	0	0	7.39761	2.89869	4.28601	5.46357
225	WEc	1	c	3	T3	210	840	58.2123	2.07027	0.255078	19.299	5.49193	4.49773	4.85784	72.4415	0.501118	0	14.2533	3.55812	3.37586	3.58817	76.2872	0	0	7.39761	2.89869	4.28601	5.46357
226	WEc	1	c	3	T3	170	680	58.2123	2.07027	0.255078	19.299	5.49193	4.49773	4.85784	72.4415	0.501118	0	14.2533	3.55812	3.37586	3.58817	76.2872	0	0	7.39761	2.89869	4.28601	5.46357
227	WEc	1	c	3	T3	187	748	58.2123	2.07027	0.255078	19.299	5.49193	4.49773	4.85784	72.4415	0.501118	0	14.2533	3.55812	3.37586	3.58817	76.2872	0	0	7.39761	2.89869	4.28601	5.46357
228	WEc	1	c	3	T3	292	1168	58.2123	2.07027	0.255078	19.299	5.49193	4.49773	4.85784	72.4415	0.501118	0	14.2533	3.55812	3.37586	3.58817	76.2872	0	0	7.39761	2.89869	4.28601	5.46357
229	WEc	1	c	3	T3	223	892	58.2123	2.07027	0.255078	19.299	5.49193	4.49773	4.85784	72.4415	0.501118	0	14.2533	3.55812	3.37586	3.58817	76.2872	0	0	7.39761	2.89869	4.28601	5.46357
230	WEc	1	c	3	T3	248	992	58.2123	2.07027	0.255078	19.299	5.49193	4.49773	4.85784	72.4415	0.501118	0	14.2533	3.55812	3.37586	3.58817	76.2872	0	0	7.39761	2.89869	4.28601	5.46357
231	WEc	1	c	2	T2	327	1308	58.2123	2.07027	0.255078	19.299	5.49193	4.49773	4.85784	72.4415	0.501118	0	14.2533	3.55812	3.37586	3.58817	76.2872	0	0	7.39761	2.89869	4.28601	5.46357
232	WEc	1	c	2	T2	666	2664	58.2123	2.07027	0.255078	19.299	5.49193	4.49773	4.85784	72.4415	0.501118	0	14.2533	3.55812	3.37586	3.58817	76.2872	0	0	7.39761	2.89869	4.28601	5.46357
233	WEc	1	c	2	T2	284	1136	58.2123	2.07027	0.255078	19.299	5.49193	4.49773	4.85784	72.4415	0.501118	0	14.2533	3.55812	3.37586	3.58817	76.2872	0	0	7.39761	2.89869	4.28601	5.46357
234	WEc	1	c	2	T2	436	1744	58.2123	2.07027	0.255078	19.299	5.49193	4.49773	4.85784	72.4415	0.501118	0	14.2533	3.55812	3.37586	3.58817	76.2872	0	0	7.39761	2.89869	4.28601	5.46357
235	WEc	1	c	2	T2	223	892	58.2123	2.07027	0.255078	19.299	5.49193	4.49773	4.85784	72.4415	0.501118	0	14.2533	3.55812	3.37586	3.58817	76.2872	0	0	7.39761	2.89869	4.28601	5.46357
236	WEc	1	c	2	T2	478	1912	58.2123	2.07027	0.255078	19.299	5.49193	4.49773	4.85784	72.4415	0.501118	0	14.2533	3.55812	3.37586	3.58817	76.2872	0	0	7.39761	2.89869	4.28601	5.46357
237	WEc	1	c	1	T1	963	3852	58.2123	2.07027	0.255078	19.299	5.49193	4.49773	4.85784	72.4415	0.501118	0	14.2533	3.55812	3.37586	3.58817	76.2872	0	0	7.39761	2.89869	4.28601	5.46357
238	WEc	1	c	1	T1	397	1588	58.2123	2.07027	0.255078	19.299	5.49193	4.49773	4.85784	72.4415	0.501118	0	14.2533	3.55812	3.37586	3.58817	76.2872	0	0	7.39761	2.89869	4.28601	5.46357
239	WEc	1	c	1	T1	715	2860	58.2123	2.07027	0.255078	19.299	5.49193	4.49773	4.85784	72.4415	0.501118	0	14.2533	3.55812	3.37586	3.58817	76.2872	0	0	7.39761	2.89869	4.28601	5.46357
240	WEc	1	c	1	T1	423	1692	58.2123	2.07027	0.255078	19.299	5.49193	4.49773	4.85784	72.4415	0.501118	0	14.2533	3.55812	3.37586	3.58817	76.2872	0	0	7.39761	2.89869	4.28601	5.46357
241	WEc	1	c	1	T1	726	2904	58.2123	2.07027	0.255078	19.299	5.49193	4.49773	4.85784	72.4415	0.501118	0	14.2533	3.55812	3.37586	3.58817	76.2872	0	0	7.39761	2.89869	4.28601	5.46357
242	WEc	1	c	1	T1	358	1432	58.2123	2.07027	0.255078	19.299	5.49193	4.49773	4.85784	72.4415	0.501118	0	14.2533	3.55812	3.37586	3.58817	76.2872	0	0	7.39761	2.89869	4.28601	5.46357
243	WEc	1	c	1	T1	580	2320	58.2123	2.07027	0.255078	19.299	5.49193	4.49773	4.85784	72.4415	0.501118	0	14.2533	3.55812	3.37586	3.58817	76.2872	0	0	7.39761	2.89869	4.28601	5.46357
244	WYc	1	c	4	T4	2008	8032	3.50928	0	1.17295	39.6068	2.49208	34.1612	14.8607	4.40311	0	2.48261	44.5592	0.84031	36.5015	9.26599	4.12364	0	4.86912	49.8259	0	27.5069	10.0951
245	WYc	1	c	4	T4	2188	8752	3.50928	0	1.17295	39.6068	2.49208	34.1612	14.8607	4.40311	0	2.48261	44.5592	0.84031	36.5015	9.26599	4.12364	0	4.86912	49.8259	0	27.5069	10.0951
246	WYc	1	c	4	T4	2047	8188	3.50928	0	1.17295	39.6068	2.49208	34.1612	14.8607	4.40311	0	2.48261	44.5592	0.84031	36.5015	9.26599	4.12364	0	4.86912	49.8259	0	27.5069	10.0951
247	WYc	1	c	4	T4	834	3336	3.50928	0	1.17295	39.6068	2.49208	34.1612	14.8607	4.40311	0	2.48261	44.5592	0.84031	36.5015	9.26599	4.12364	0	4.86912	49.8259	0	27.5069	10.0951
248	WYc	1	c	4	T4	2299	9196	3.50928	0	1.17295	39.6068	2.49208	34.1612	14.8607	4.40311	0	2.48261	44.5592	0.84031	36.5015	9.26599	4.12364	0	4.86912	49.8259	0	27.5069	10.0951
249	WYc	1	c	4	T4	491	1964	3.50928	0	1.17295	39.6068	2.49208	34.1612	14.8607	4.40311	0	2.48261	44.5592	0.84031	36.5015	9.26599	4.12364	0	4.86912	49.8259	0	27.5069	10.0951
250	WYc	1	c	3	T3	72	288	3.50928	0	1.17295	39.6068	2.49208	34.1612	14.8607	4.40311	0	2.48261	44.5592	0.84031	36.5015	9.26599	4.12364	0	4.86912	49.8259	0	27.5069	10.0951
251	WYc	1	c	3	T3	65	260	3.50928	0	1.17295	39.6068	2.49208	34.1612	14.8607	4.40311	0	2.48261	44.5592	0.84031	36.5015	9.26599	4.12364	0	4.86912	49.8259	0	27.5069	10.0951
252	WYc	1	c	3	T3	23	92	3.50928	0	1.17295	39.6068	2.49208	34.1612	14.8607	4.40311	0	2.48261	44.5592	0.84031	36.5015	9.26599	4.12364	0	4.86912	49.8259	0	27.5069	10.0951
253	WYc	1	c	3	T3	24	96	3.50928	0	1.17295	39.6068	2.49208	34.1612	14.8607	4.40311	0	2.48261	44.5592	0.84031	36.5015	9.26599	4.12364	0	4.86912	49.8259	0	27.5069	10.0951
254	WYc	1	c	3	T3	43	172	3.50928	0	1.17295	39.6068	2.49208	34.1612	14.8607	4.40311	0	2.48261	44.5592	0.84031	36.5015	9.26599	4.12364	0	4.86912	49.8259	0	27.5069	10.0951
255	WYc	1	c	3	T3	45	180	3.50928	0	1.17295	39.6068	2.49208	34.1612	14.8607	4.40311	0	2.48261	44.5592	0.84031	36.5015	9.26599	4.12364	0	4.86912	49.8259	0	27.5069	10.0951
256	WYc	1	c	2	T2	1381	5524	3.50928	0	1.17295	39.6068	2.49208	34.1612	14.8607	4.40311	0	2.48261	44.5592	0.84031	36.5015	9.26599	4.12364	0	4.86912	49.8259	0	27.5069	10.0951
257	WYc	1	c	2	T2	220	880	3.50928	0	1.17295	39.6068	2.49208	34.1612	14.8607	4.40311	0	2.48261	44.5592	0.84031	36.5015	9.26599	4.12364	0	4.86912	49.8259	0	27.5069	10.0951
258	WYc	1	c	2	T2	849	3396	3.50928	0	1.17295	39.6068	2.49208	34.1612	14.8607	4.40311	0	2.48261	44.5592	0.84031	36.5015	9.26599	4.12364	0	4.86912	49.8259	0	27.5069	10.0951
259	WYc	1	c	2	T2	619	2476	3.50928	0	1.17295	39.6068	2.49208	34.1612	14.8607	4.40311	0	2.48261	44.5592	0.84031	36.5015	9.26599	4.12364	0	4.86912	49.8259	0	27.5069	10.0951
260	WYc	1	c	2	T2	973	3892	3.50928	0	1.17295	39.6068	2.49208	34.1612	14.8607	4.40311	0	2.48261	44.5592	0.84031	36.5015	9.26599	4.12364	0	4.86912	49.8259	0	27.5069	10.0951
261	WYc	1	c	2	T2	954	3816	3.50928	0	1.17295	39.6068	2.49208	34.1612	14.8607	4.40311	0	2.48261	44.5592	0.84031	36.5015	9.26599	4.12364	0	4.86912	49.8259	0	27.5069	10.0951
262	WYc	1	c	1	T1	427	1708	3.50928	0	1.17295	39.6068	2.49208	34.1612	14.8607	4.40311	0	2.48261	44.5592	0.84031	36.5015	9.26599	4.12364	0	4.86912	49.8259	0	27.5069	10.0951
263	WYc	1	c	1	T1	1703	6812	3.50928	0	1.17295	39.6068	2.49208	34.1612	14.8607	4.40311	0	2.48261	44.5592	0.84031	36.5015	9.26599	4.12364	0	4.86912	49.8259	0	27.5069	10.0951
264	WYc	1	c	1	T1	347	1388	3.50928	0	1.17295	39.6068	2.49208	34.1612	14.8607	4.40311	0	2.48261	44.5592	0.84031	36.5015	9.26599	4.12364	0	4.86912	49.8259	0	27.5069	10.0951
265	WYc	1	c	1	T1	1375	5500	3.50928	0	1.17295	39.6068	2.49208	34.1612	14.8607	4.40311	0	2.48261	44.5592	0.84031	36.5015	9.26599	4.12364	0	4.86912	49.8259	0	27.5069	10.0951
266	WYc	1	c	1	T1	1070	4280	3.50928	0	1.17295	39.6068	2.49208	34.1612	14.8607	4.40311	0	2.48261	44.5592	0.84031	36.5015	9.26599	4.12364	0	4.86912	49.8259	0	27.5069	10.0951
267	WYc	1	c	1	T1	901	3604	3.50928	0	1.17295	39.6068	2.49208	34.1612	14.8607	4.40311	0	2.48261	44.5592	0.84031	36.5015	9.26599	4.12364	0	4.86912	49.8259	0	27.5069	10.0951

## Sheet: 2012gis
site	sitetrt	buffdist	field	forage	fruitveg	forest	grassland	urban	turf	pctfield1500	pctforage1500	pctfruitveg1500	pctforest1500	pctgrassland1500	pcturban1500	pctturf1500	pctfield1000	pctforage1000	pctfruitveg1000	pctforest1000	pctgrassland1000	pcturban1000	pctturf1000	pctfield500	pctforage500	pctfruitveg500	pctforest500	pctgrassland500	pcturban500	pctturf500
BA	a	500	59.5473	0	0	20.56	7.38495	6.6801	5.56172	42.7242	0.130164	4.33068	13.8874	5.55992	12.6388	9.43704	50.998	0.292882	1.43281	13.9275	7.05482	8.55573	8.52795	59.5473	0	0	20.56	7.38495	6.6801	5.56172
FN	c	500	8.16871	19.7629	28.0252	29.2454	0.270054	0.348327	0	18.6521	5.96332	3.37159	35.4354	8.9664	3.30395	6.07156	10.8995	6.52574	7.5864	38.4193	10.5609	2.18592	7.1808	8.16871	19.7629	28.0252	29.2454	0.270054	0.348327	0
FW	c	500	17.8781	8.33912	4.2293	14.668	26.9247	24.4799	1.41707	36.7715	4.65981	2.65578	13.6742	10.3104	8.85573	3.9815	32.4529	7.90492	1.32733	12.0988	14.2028	12.3263	2.62896	17.8781	8.33912	4.2293	14.668	26.9247	24.4799	1.41707
JB	a	500	64.4196	0	13.5965	0.960073	0	4.34106	0.851915	56.9539	0.798544	2.86631	11.5915	3.15884	8.56563	11.1127	67.2122	0	6.44949	5.02964	3.4994	4.08385	8.04009	64.4196	0	13.5965	0.960073	0	4.34106	0.851915
JB	p	500	62.5663	0	21.5551	1.94452	0	0	0	62.1852	0.160687	2.51642	8.84795	2.68159	5.33019	9.06698	73.2323	0	5.66218	5.60717	0.836169	2.90409	5.15275	62.5663	0	21.5551	1.94452	0	0	0
KG	c	500	54.1903	0	6.52258	6.40817	18.736	4.56362	4.44607	27.5782	0	4.60404	19.925	14.8593	9.38498	14.5499	37.1103	0	6.44531	16.0544	18.9126	9.79571	8.88149	54.1903	0	6.52258	6.40817	18.736	4.56362	4.44607
MK	p	500	7.29187	0	0.313607	59.4851	15.4712	6.95723	8.97916	41.7783	2.86983	0.0348391	31.9277	6.89853	5.1351	6.43974	36.6027	1.63594	0.0783915	34.3496	10.9236	4.64847	6.92362	7.29187	0	0.313607	59.4851	15.4712	6.95723	8.97916
PK	a	500	21.6626	7.45914	0.603074	19.6066	4.25125	31.8457	5.17367	12.8739	1.0767	0.0669964	46.1966	11.5178	12.9549	13.4157	20.4663	2.42269	0.150748	32.0377	11.741	19.1676	10.8118	21.6626	7.45914	0.603074	19.6066	4.25125	31.8457	5.17367
PK	p	500	21.6626	7.45914	0.603074	19.6066	4.25125	31.8457	5.17367	12.8739	1.0767	0.0669964	46.1966	11.5178	12.9549	13.4157	20.4663	2.42269	0.150748	32.0377	11.741	19.1676	10.8118	21.6626	7.45914	0.603074	19.6066	4.25125	31.8457	5.17367
RC	c	500	9.52637	0	15.6844	39.8526	4.16408	6.29076	9.1647	14.326	0.155082	4.59973	37.6999	7.97488	6.1776	17.9171	15.4714	0	7.16798	33.7918	6.94081	6.42941	16.4387	9.52637	0	15.6844	39.8526	4.16408	6.29076	9.1647
RT	a	500	25.0998	0	26.8922	15.9466	0.791512	7.68598	19.2541	15.5942	1.54369	7.42086	25.0362	4.7865	8.15751	13.1898	17.5861	1.27808	12.9679	28.5448	3.88907	5.67947	11.5275	25.0998	0	26.8922	15.9466	0.791512	7.68598	19.2541
SC	a	500	82.943	0	1.07639	0	5.26987	4.11575	6.51854	71.6351	0.684161	0.119578	9.49083	1.37141	4.7522	7.11079	86.0676	0	0.269062	1.50234	2.29646	2.39678	4.88493	82.943	0	1.07639	0	5.26987	4.11575	6.51854
ST	c	500	46.0077	3.76815	6.56695	19.3475	18.2687	4.95073	0.162651	25.3625	4.93479	1.5968	35.9908	11.399	4.75913	4.05034	21.2992	6.15273	2.4424	39.2711	15.3736	5.16251	6.57888	46.0077	3.76815	6.56695	19.3475	18.2687	4.95073	0.162651
TG	a	500	70.0932	0.400406	8.7414	7.39517	1.10237	4.02753	7.08269	51.0566	3.0474	1.12259	20.6169	4.29248	2.96032	6.04701	57.6895	3.31582	2.19251	19.3846	2.79166	2.92421	5.97492	70.0932	0.400406	8.7414	7.39517	1.10237	4.02753	7.08269
TG	p	500	53.8545	0	9.61639	23.7299	2.04026	2.07	3.48753	48.0516	1.97144	1.0683	24.6429	2.1914	3.26499	6.96865	52.6031	2.12286	2.40378	21.6379	2.53403	3.52558	6.0534	53.8545	0	9.61639	23.7299	2.04026	2.07	3.48753
WE	c	500	76.2872	0	0	7.39761	2.89869	4.28601	5.46357	58.2123	2.07027	0.255078	19.299	5.49193	4.49773	4.85784	72.4415	0.501118	0	14.2533	3.55812	3.37586	3.58817	76.2872	0	0	7.39761	2.89869	4.28601	5.46357
WY	c	500	4.12364	0	4.86912	49.8259	0	27.5069	10.0951	3.50928	0	1.17295	39.6068	2.49208	34.1612	14.8607	4.40311	0	2.48261	44.5592	0.84031	36.5015	9.26599	4.12364	0	4.86912	49.8259	0	27.5069	10.0951
BA	a	1000	50.998	0.292882	1.43281	13.9275	7.05482	8.55573	8.52795
FN	c	1000	10.8995	6.52574	7.5864	38.4193	10.5609	2.18592	7.1808
FW	c	1000	32.4529	7.90492	1.32733	12.0988	14.2028	12.3263	2.62896
JB	a	1000	67.2122	0	6.44949	5.02964	3.4994	4.08385	8.04009
JB	p	1000	73.2323	0	5.66218	5.60717	0.836169	2.90409	5.15275
KG	c	1000	37.1103	0	6.44531	16.0544	18.9126	9.79571	8.88149
MK	p	1000	36.6027	1.63594	0.0783915	34.3496	10.9236	4.64847	6.92362
PK	a	1000	20.4663	2.42269	0.150748	32.0377	11.741	19.1676	10.8118
PK	p	1000	20.4663	2.42269	0.150748	32.0377	11.741	19.1676	10.8118
RC	c	1000	15.4714	0	7.16798	33.7918	6.94081	6.42941	16.4387
RT	a	1000	17.5861	1.27808	12.9679	28.5448	3.88907	5.67947	11.5275
SC	a	1000	86.0676	0	0.269062	1.50234	2.29646	2.39678	4.88493
ST	c	1000	21.2992	6.15273	2.4424	39.2711	15.3736	5.16251	6.57888
TG	a	1000	57.6895	3.31582	2.19251	19.3846	2.79166	2.92421	5.97492
TG	p	1000	52.6031	2.12286	2.40378	21.6379	2.53403	3.52558	6.0534
WE	c	1000	72.4415	0.501118	0	14.2533	3.55812	3.37586	3.58817
WY	c	1000	4.40311	0	2.48261	44.5592	0.84031	36.5015	9.26599
BA	a	1500	42.7242	0.130164	4.33068	13.8874	5.55992	12.6388	9.43704
FN	c	1500	18.6521	5.96332	3.37159	35.4354	8.9664	3.30395	6.07156
FW	c	1500	36.7715	4.65981	2.65578	13.6742	10.3104	8.85573	3.9815
JB	a	1500	56.9539	0.798544	2.86631	11.5915	3.15884	8.56563	11.1127
JB	p	1500	62.1852	0.160687	2.51642	8.84795	2.68159	5.33019	9.06698
KG	c	1500	27.5782	0	4.60404	19.925	14.8593	9.38498	14.5499
MK	p	1500	41.7783	2.86983	0.0348391	31.9277	6.89853	5.1351	6.43974
PK	a	1500	12.8739	1.0767	0.0669964	46.1966	11.5178	12.9549	13.4157
PK	p	1500	12.8739	1.0767	0.0669964	46.1966	11.5178	12.9549	13.4157
RC	c	1500	14.326	0.155082	4.59973	37.6999	7.97488	6.1776	17.9171
RT	a	1500	15.5942	1.54369	7.42086	25.0362	4.7865	8.15751	13.1898
SC	a	1500	71.6351	0.684161	0.119578	9.49083	1.37141	4.7522	7.11079
ST	c	1500	25.3625	4.93479	1.5968	35.9908	11.399	4.75913	4.05034
TG	a	1500	51.0566	3.0474	1.12259	20.6169	4.29248	2.96032	6.04701
TG	p	1500	48.0516	1.97144	1.0683	24.6429	2.1914	3.26499	6.96865
WE	c	1500	58.2123	2.07027	0.255078	19.299	5.49193	4.49773	4.85784
WY	c	1500	3.50928	0	1.17295	39.6068	2.49208	34.1612	14.8607

## Sheet: 2011gis
site	sitetrt	buffdist	field	forage	fruitveg	forest	grassland	urban	turf	pctfield1500	pctforage1500	pctfruitveg1500	pctforest1500	pctgrassland1500	pcturban1500	pctturf1500	pctfield1000	pctforage1000	pctfruitveg1000	pctforest1000	pctgrassland1000	pcturban1000	pctturf1000	pctfield500	pctforage500	pctfruitveg500	pctforest500	pctgrassland500	pcturban500	pctturf500
BA	c	1500	41.2555	5.0688	7.66997	15.7269	7.5705	6.882	6.2746	41.2555	5.0688	7.66997	15.7269	7.5705	6.882	6.2746	28.3133	5.8634	17.2198	16.7993	8.6928	9.3638	5.6097	29.2243	3.051	28.4905	21.0031	7.974	5.65	2.5287
FN	c	1500	24.1611	0.9939	5.2457	31.4731	11.9663	4.235	2.8433	24.1611	0.9939	5.2457	31.4731	11.9663	4.235	2.8433	25.7831	2.2362	11.8036	35.2374	9.7022	5.8469	2.4698	13.3118	8.9085	24.2231	36.9672	5.144	10.6544	0.7867
FW	c	1500	41.0211	5.2859	0.44248	11.5864	17.0939	6.5847	2.7243	41.0211	5.2859	0.44248	11.5864	17.0939	6.5847	2.7243	37.5512	8.9046	0.9956	7.9193	20.9331	10.2708	2.21875	19.5337	6.0853	2.3718	10.3248	36.981	19.6256	1.5897
JB	a	1500	59.3235	0	3.61883	7.5589	7.9293	5.2445	10.3869	59.3235	0	3.61883	7.5589	7.9293	5.2445	10.3869	71.8306	0	8.1427	4.8299	4.6123	3.1468	5.34781	72.2194	0	21.3525	1.6168	0.0608	0	0
KG	c	1500	30.8802	3.9384	3.73433	18.8311	15.8494	11.4232	6.4153	30.8802	3.9384	3.73433	18.8311	15.8494	11.4232	6.4153	32.4866	4.6461	7.5984	13.6856	18.9425	8.4722	7.78832	55.7656	0.6391	3.711	5.7151	20.7782	5.0854	1.5471
PK	c	1500	8.7239	5.5492	0.446	40.2614	15.2171	10.8967	11.3807	8.7239	5.5492	0.446	40.2614	15.2171	10.8967	11.3807	14.0141	6.4137	1.0031	31.1499	16.2132	16.8478	8.88492	21.852	7.5821	4.0129	13.7927	5.8739	25.0412	16.4221
RC	c	1500	20.4633	2.0867	2.25475	33.376	8.6755	6.2059	14.6015	20.4633	2.0867	2.25475	33.376	8.6755	6.2059	14.6015	18.1023	2.5486	4.2218	31.4599	11.4246	5.9511	16.7963	8.427	0	9.819	36.1858	11.0197	7.6474	10.9364
ST	c	1500	27.2706	5.5614	3.31853	31.272	14.1576	5.4357	3.3612	27.2706	5.5614	3.31853	31.272	14.1576	5.4357	3.3612	27.3105	5.3376	5.6465	34.0616	14.0324	5.4288	6.3468	24.8514	4.5811	20.4593	30.0297	17.9609	1.9219	0.0207
TG	a	1500	46.5542	12.1091	0.6506	21.9785	3.0833	7.4129	3.4339	46.5542	12.1091	0.6506	21.9785	3.0833	7.4129	3.4339	49.2866	15.3168	1.4639	19.376	1.6987	9.2203	1.8164	45.3673	21.8332	5.8564	14.994	0.9221	7.5704	3.456
TP	c	1500	29.7067	3.9973	1.69967	38.1094	7.9003	7.5998	3.876	29.7067	3.9973	1.69967	38.1094	7.9003	7.5998	3.876	35.1232	5.7937	3.7603	34.9998	6.1102	8.0368	4.2889	53.4416	0.9328	1.1457	34.6991	1.1792	2.6977	4.0106
WE	c	1500	64.4346	4.2742	1.80621	10.6264	7.7508	3.8678	1.2611	64.4346	4.2742	1.80621	10.6264	7.7508	3.8678	1.2611	81.5621	0.4106	2.6228	2.7573	7.979	3.1018	0.9266	82.6381	0	9.5685	0	2.8841	3.8095	0
WY	c	1500	3.5387	1.2448	1.036	37.9874	6.2955	29.6897	15.6403	3.5387	1.2448	1.036	37.9874	6.2955	29.6897	15.6403	4.1524	0	2.3311	41.7515	4.4709	31.8665	13.0636	8.227	0	9.3252	45.6851	2.6505	20.8008	10.0307
BA	a	1000	28.3133	5.8634	17.2198	16.7993	8.6928	9.3638	5.6097
FN	c	1000	25.7831	2.2362	11.8036	35.2374	9.7022	5.8469	2.4698
FW	c	1000	37.5512	8.9046	0.9956	7.9193	20.9331	10.2708	2.21875
JB	c	1000	71.8306	0	8.1427	4.8299	4.6123	3.1468	5.34781
KG	c	1000	32.4866	4.6461	7.5984	13.6856	18.9425	8.4722	7.78832
PK	c	1000	14.0141	6.4137	1.0031	31.1499	16.2132	16.8478	8.88492
RC	c	1000	18.1023	2.5486	4.2218	31.4599	11.4246	5.9511	16.7963
ST	c	1000	27.3105	5.3376	5.6465	34.0616	14.0324	5.4288	6.3468
TG	a	1000	49.2866	15.3168	1.4639	19.376	1.6987	9.2203	1.8164
TP	c	1000	35.1232	5.7937	3.7603	34.9998	6.1102	8.0368	4.2889
WE	c	1000	81.5621	0.4106	2.6228	2.7573	7.979	3.1018	0.9266
WY	c	1000	4.1524	0	2.3311	41.7515	4.4709	31.8665	13.0636
BA	c	500	29.2243	3.051	28.4905	21.0031	7.974	5.65	2.5287
FN	c	500	13.3118	8.9085	24.2231	36.9672	5.144	10.6544	0.7867
FW	c	500	19.5337	6.0853	2.3718	10.3248	36.981	19.6256	1.5897
JB	a	500	72.2194	0	21.3525	1.6168	0.0608	0	0
KG	c	500	55.7656	0.6391	3.711	5.7151	20.7782	5.0854	1.5471
PK	c	500	21.852	7.5821	4.0129	13.7927	5.8739	25.0412	16.4221
RC	c	500	8.427	0	9.819	36.1858	11.0197	7.6474	10.9364
ST	c	500	24.8514	4.5811	20.4593	30.0297	17.9609	1.9219	0.0207
TG	a	500	45.3673	21.8332	5.8564	14.994	0.9221	7.5704	3.456
TP	c	500	53.4416	0.9328	1.1457	34.6991	1.1792	2.6977	4.0106
WE	c	500	82.6381	0	9.5685	0	2.8841	3.8095	0
WY	c	500	8.227	0	9.3252	45.6851	2.6505	20.8008	10.0307

## Sheet: 2012giskey
buffdist	buffer distance from pumpkin field
buffdist = 500	500m radius
buffdist = 1000	1000m radius
buffdist = 1500	1500m radius
lulclass	landscape use classification
lulclass = 0	unknown
lulclass = 1	corn
lulclass = 2	soybean
lulclass = 3	wheat/grain
lulclass = 2/3	beans planted in wheat stubble
lulclass = 4	forage
lulclass = 5	forest/woodlot/treebreak
lulclass = 6	orchard/nursery
lulclass = 8	wetland
lulclass = 9	river cooridor
lulclass = 10	old field/grassland/crp
lulclass = 11	residential/urban
lulclass = 12	pasture
lulclass = 19	cucurbits
lulclass = 20	sunflower
lulclass = 21	mixed vegetables
lulclass = 22	tilled/bare soil
lulclass = 23	mowed
lulclass = 24	turf
lulclass = 25	open water
lulclass = 28	vine/small fruit crops
lulclass = 29	orchard
field crops =	soy + corn + wheat/grain crop + sunflower
forage =	alfalfa/hay crop
fruit and veg =	orchard/nursery + vine/small fruit crop + mixed vegetables + cucurbits
forest =	forests/woodlot
grassland =	grassland/scrubland + pasture + river corridor
urban =	residental/urban
water =	open water
turf =	mowed + turf

## Sheet: 2011giskey
buffdist	buffer distance from pumpkin field
buffdist = 500	500m radius
buffdist = 1000	1000m radius
buffdist = 1500	1500m radius
lulclass	landscape use classification
lulclass = 0	unknown
lulclass = 1	soy
lulclass = 2	corn
lulclass = 3	wheat/grain crop
lulclass = 4	alfalfa/hay crop
lulclass = 5	orchard/nursery
lulclass = 6	vine/small fruit crop
lulclass = 7	mixed vegetable
lulclass = 8	cucurbits
lulclass = 9	forest
lulclass = 10	grassland/scrubland
lulclass = 11	residential/urban
lulclass = 12	open water
lulclass = 13	pasture
lulclass = 14	river corridor
lulclass = 15	sunflower
lulclass = 16	bare ground
lulclass = 17	mowed turf
lulclass = 18	treeline
lulclass = 22	research pumpkins
lulclass = 23	grassy strip
lulclass = 24	sweet alyssum strip
field crops =	soy + corn + wheat/grain crop + sunflower
forage =	alfalfa/hay crop
fruit and veg =	orchard/nursery + vine/small fruit crop + mixed vegetables + cucurbits + research pumpkins
forest =	forests + treeline
grassland =	grassland/scrubland + pasture + river corridor + sweet alyssum strip + grassy strip
urban =	residental/urban
water =	open water
turf =	mowed turf
