# Supplementary material for: Use of video surveillance to measure the influences of habitat management and landscape composition on pollinator visitation and pollen deposition in pumpkin (Cucurbita pepo) agroecosystems
Source: PeerJ. 2015 Nov 5;3:e1342. doi: 10.7717/peerj.1342 (PMC4647596; doi:10.7717/peerj.1342)
Supplement: Supplemental Information 2 [file peerj-03-1342-s002.xlsx]

## Sheet: Full Data Set
Site	Time	Seed	Pollen	site	pctfield1500	pctforage1500	pctfruitveg1500	pctforest1500	pctgrassland1500	pcturban1500	pctturf1500	pctfield1000	pctforage1000	pctfruitveg1000	pctforest1000	pctgrassland1000	pcturban1000	pctturf1000	pctfield500	pctforage500	pctfruitveg500	pctforest500	pctgrassland500	pcturban500	pctturf500
BA	T1	380.667	1484.33	BA	41.2555	5.0688	7.66997	15.7269	7.5705	6.882	6.2746	28.3133	5.8634	17.2198	16.7993	8.6928	9.3638	5.6097	29.2243	3.051	28.4905	21.0031	7.974	5.65	2.5287
	T2	157.333	1017	BA	41.2555	5.0688	7.66997	15.7269	7.5705	6.882	6.2746	28.3133	5.8634	17.2198	16.7993	8.6928	9.3638	5.6097	29.2243	3.051	28.4905	21.0031	7.974	5.65	2.5287									BA	41.2555	5.0688	7.66997	15.7269	7.5705	6.882	6.2746	28.3133	5.8634	17.2198	16.7993	8.6928	9.3638	5.6097	29.2243
	T3	554.833	808	BA	41.2555	5.0688	7.66997	15.7269	7.5705	6.882	6.2746	28.3133	5.8634	17.2198	16.7993	8.6928	9.3638	5.6097	29.2243	3.051	28.4905	21.0031	7.974	5.65	2.5287									BA	41.2555	5.0688	7.66997	15.7269	7.5705	6.882	6.2746	28.3133	5.8634	17.2198	16.7993	8.6928	9.3638	5.6097	29.2243
FN	T1	#DIV/0!	#DIV/0!	FN	24.1611	0.9939	5.2457	31.4731	11.9663	4.235	2.8433	25.7831	2.2362	11.8036	35.2374	9.7022	5.8469	2.4698	13.3118	8.9085	24.2231	36.9672	5.144	10.6544	0.7867									BA	41.2555	5.0688	7.66997	15.7269	7.5705	6.882	6.2746	28.3133	5.8634	17.2198	16.7993	8.6928	9.3638	5.6097	29.2243
	T2	#DIV/0!	#DIV/0!	FN	24.1611	0.9939	5.2457	31.4731	11.9663	4.235	2.8433	25.7831	2.2362	11.8036	35.2374	9.7022	5.8469	2.4698	13.3118	8.9085	24.2231	36.9672	5.144	10.6544	0.7867									BA	41.2555	5.0688	7.66997	15.7269	7.5705	6.882	6.2746	28.3133	5.8634	17.2198	16.7993	8.6928	9.3638	5.6097	29.2243
	T3	489.667	#DIV/0!	FN	24.1611	0.9939	5.2457	31.4731	11.9663	4.235	2.8433	25.7831	2.2362	11.8036	35.2374	9.7022	5.8469	2.4698	13.3118	8.9085	24.2231	36.9672	5.144	10.6544	0.7867									BA	41.2555	5.0688	7.66997	15.7269	7.5705	6.882	6.2746	28.3133	5.8634	17.2198	16.7993	8.6928	9.3638	5.6097	29.2243
FW	T1	504	1054.33	FW	41.0211	5.2859	0.44248	11.5864	17.0939	6.5847	2.7243	37.5512	8.9046	0.9956	7.9193	20.9331	10.2708	2.21875	19.5337	6.0853	2.3718	10.3248	36.981	19.6256	1.5897									BA	41.2555	5.0688	7.66997	15.7269	7.5705	6.882	6.2746	28.3133	5.8634	17.2198	16.7993	8.6928	9.3638	5.6097	29.2243
	T2	#DIV/0!	1247	FW	41.0211	5.2859	0.44248	11.5864	17.0939	6.5847	2.7243	37.5512	8.9046	0.9956	7.9193	20.9331	10.2708	2.21875	19.5337	6.0853	2.3718	10.3248	36.981	19.6256	1.5897									BA	41.2555	5.0688	7.66997	15.7269	7.5705	6.882	6.2746	28.3133	5.8634	17.2198	16.7993	8.6928	9.3638	5.6097	29.2243
	T3	511.667	1833.67	FW	41.0211	5.2859	0.44248	11.5864	17.0939	6.5847	2.7243	37.5512	8.9046	0.9956	7.9193	20.9331	10.2708	2.21875	19.5337	6.0853	2.3718	10.3248	36.981	19.6256	1.5897				BA	41.2555	5.0688	7.66997	15.7269	7.5705	6.882	6.2746	28.3133	5.8634	17.2198	16.7993	8.6928	9.3638	5.6097	29.2243	3.051	28.4905	21.0031	7.974	5.65
JB	T1	403.667	2903.67	JB	59.3235	0	3.61883	7.5589	7.9293	5.2445	10.3869	71.8306	0	8.1427	4.8299	4.6123	3.1468	5.34781	72.2194	0	21.3525	1.6168	0.0608	0	0
	T2	346.5	1058	JB	59.3235	0	3.61883	7.5589	7.9293	5.2445	10.3869	71.8306	0	8.1427	4.8299	4.6123	3.1468	5.34781	72.2194	0	21.3525	1.6168	0.0608	0	0
	T3	122.667	1313	JB	59.3235	0	3.61883	7.5589	7.9293	5.2445	10.3869	71.8306	0	8.1427	4.8299	4.6123	3.1468	5.34781	72.2194	0	21.3525	1.6168	0.0608	0	0
KG	T1	638.333	2731.33	KG	30.8802	3.9384	3.73433	18.8311	15.8494	11.4232	6.4153	32.4866	4.6461	7.5984	13.6856	18.9425	8.4722	7.78832	55.7656	0.6391	3.711	5.7151	20.7782	5.0854	1.5471									FN	24.1611	0.9939	5.2457	31.4731	11.9663	4.235	2.8433	25.7831	2.2362	11.8036	35.2374	9.7022	5.8469	2.4698	13.3118
	T2	546.5	3091.67	KG	30.8802	3.9384	3.73433	18.8311	15.8494	11.4232	6.4153	32.4866	4.6461	7.5984	13.6856	18.9425	8.4722	7.78832	55.7656	0.6391	3.711	5.7151	20.7782	5.0854	1.5471									FN	24.1611	0.9939	5.2457	31.4731	11.9663	4.235	2.8433	25.7831	2.2362	11.8036	35.2374	9.7022	5.8469	2.4698	13.3118
	T3	355.333	2527.67	KG	30.8802	3.9384	3.73433	18.8311	15.8494	11.4232	6.4153	32.4866	4.6461	7.5984	13.6856	18.9425	8.4722	7.78832	55.7656	0.6391	3.711	5.7151	20.7782	5.0854	1.5471									FN	24.1611	0.9939	5.2457	31.4731	11.9663	4.235	2.8433	25.7831	2.2362	11.8036	35.2374	9.7022	5.8469	2.4698	13.3118
PK	T1	#DIV/0!	#DIV/0!	PK	8.7239	5.5492	0.446	40.2614	15.2171	10.8967	11.3807	14.0141	6.4137	1.0031	31.1499	16.2132	16.8478	8.88492	21.852	7.5821	4.0129	13.7927	5.8739	25.0412	16.4221									FN	24.1611	0.9939	5.2457	31.4731	11.9663	4.235	2.8433	25.7831	2.2362	11.8036	35.2374	9.7022	5.8469	2.4698	13.3118
	T2	#DIV/0!	#DIV/0!	PK	8.7239	5.5492	0.446	40.2614	15.2171	10.8967	11.3807	14.0141	6.4137	1.0031	31.1499	16.2132	16.8478	8.88492	21.852	7.5821	4.0129	13.7927	5.8739	25.0412	16.4221									FN	24.1611	0.9939	5.2457	31.4731	11.9663	4.235	2.8433	25.7831	2.2362	11.8036	35.2374	9.7022	5.8469	2.4698	13.3118
	T3	406.333	#DIV/0!	PK	8.7239	5.5492	0.446	40.2614	15.2171	10.8967	11.3807	14.0141	6.4137	1.0031	31.1499	16.2132	16.8478	8.88492	21.852	7.5821	4.0129	13.7927	5.8739	25.0412	16.4221									FN	24.1611	0.9939	5.2457	31.4731	11.9663	4.235	2.8433	25.7831	2.2362	11.8036	35.2374	9.7022	5.8469	2.4698	13.3118
RC	T1	354	2977	RC	20.4633	2.0867	2.25475	33.376	8.6755	6.2059	14.6015	18.1023	2.5486	4.2218	31.4599	11.4246	5.9511	16.7963	8.427	0	9.819	36.1858	11.0197	7.6474	10.9364									FW	41.0211	5.2859	0.44248	11.5864	17.0939	6.5847	2.7243	37.5512	8.9046	0.9956	7.9193	20.9331	10.2708	2.21875	19.5337
	T2	380.667	2292	RC	20.4633	2.0867	2.25475	33.376	8.6755	6.2059	14.6015	18.1023	2.5486	4.2218	31.4599	11.4246	5.9511	16.7963	8.427	0	9.819	36.1858	11.0197	7.6474	10.9364									FW	41.0211	5.2859	0.44248	11.5864	17.0939	6.5847	2.7243	37.5512	8.9046	0.9956	7.9193	20.9331	10.2708	2.21875	19.5337
	T3	614.333	1998.33	RC	20.4633	2.0867	2.25475	33.376	8.6755	6.2059	14.6015	18.1023	2.5486	4.2218	31.4599	11.4246	5.9511	16.7963	8.427	0	9.819	36.1858	11.0197	7.6474	10.9364									FW	41.0211	5.2859	0.44248	11.5864	17.0939	6.5847	2.7243	37.5512	8.9046	0.9956	7.9193	20.9331	10.2708	2.21875	19.5337
ST	T1	578	1176.67	ST	27.2706	5.5614	3.31853	31.272	14.1576	5.4357	3.3612	27.3105	5.3376	5.6465	34.0616	14.0324	5.4288	6.3468	24.8514	4.5811	20.4593	30.0297	17.9609	1.9219	0.0207									FW	41.0211	5.2859	0.44248	11.5864	17.0939	6.5847	2.7243	37.5512	8.9046	0.9956	7.9193	20.9331	10.2708	2.21875	19.5337
	T2	208.333	2163	ST	27.2706	5.5614	3.31853	31.272	14.1576	5.4357	3.3612	27.3105	5.3376	5.6465	34.0616	14.0324	5.4288	6.3468	24.8514	4.5811	20.4593	30.0297	17.9609	1.9219	0.0207									FW	41.0211	5.2859	0.44248	11.5864	17.0939	6.5847	2.7243	37.5512	8.9046	0.9956	7.9193	20.9331	10.2708	2.21875	19.5337
	T3	409.667	2603.67	ST	27.2706	5.5614	3.31853	31.272	14.1576	5.4357	3.3612	27.3105	5.3376	5.6465	34.0616	14.0324	5.4288	6.3468	24.8514	4.5811	20.4593	30.0297	17.9609	1.9219	0.0207									FW	41.0211	5.2859	0.44248	11.5864	17.0939	6.5847	2.7243	37.5512	8.9046	0.9956	7.9193	20.9331	10.2708	2.21875	19.5337
TG	T1	#DIV/0!	1829.33	TG	46.5542	12.1091	0.6506	21.9785	3.0833	7.4129	3.4339	49.2866	15.3168	1.4639	19.376	1.6987	9.2203	1.8164	45.3673	21.8332	5.8564	14.994	0.9221	7.5704	3.456									FW	41.0211	5.2859	0.44248	11.5864	17.0939	6.5847	2.7243	37.5512	8.9046	0.9956	7.9193	20.9331	10.2708	2.21875	19.5337
	T2	#DIV/0!	1297.33	TG	46.5542	12.1091	0.6506	21.9785	3.0833	7.4129	3.4339	49.2866	15.3168	1.4639	19.376	1.6987	9.2203	1.8164	45.3673	21.8332	5.8564	14.994	0.9221	7.5704	3.456									FW	41.0211	5.2859	0.44248	11.5864	17.0939	6.5847	2.7243	37.5512	8.9046	0.9956	7.9193	20.9331	10.2708	2.21875	19.5337
	T3	302.333	1418.33	TG	46.5542	12.1091	0.6506	21.9785	3.0833	7.4129	3.4339	49.2866	15.3168	1.4639	19.376	1.6987	9.2203	1.8164	45.3673	21.8332	5.8564	14.994	0.9221	7.5704	3.456									FW	41.0211	5.2859	0.44248	11.5864	17.0939	6.5847	2.7243	37.5512	8.9046	0.9956	7.9193	20.9331	10.2708	2.21875	19.5337
TP	T1	#DIV/0!	1546.67	TP	29.7067	3.9973	1.69967	38.1094	7.9003	7.5998	3.876	35.1232	5.7937	3.7603	34.9998	6.1102	8.0368	4.2889	53.4416	0.9328	1.1457	34.6991	1.1792	2.6977	4.0106
	T2	#DIV/0!	856.667	TP	29.7067	3.9973	1.69967	38.1094	7.9003	7.5998	3.876	35.1232	5.7937	3.7603	34.9998	6.1102	8.0368	4.2889	53.4416	0.9328	1.1457	34.6991	1.1792	2.6977	4.0106
	T3	453.667	923	TP	29.7067	3.9973	1.69967	38.1094	7.9003	7.5998	3.876	35.1232	5.7937	3.7603	34.9998	6.1102	8.0368	4.2889	53.4416	0.9328	1.1457	34.6991	1.1792	2.6977	4.0106
WE	T1	#DIV/0!	#DIV/0!	WE	64.4346	4.2742	1.80621	10.6264	7.7508	3.8678	1.2611	81.5621	0.4106	2.6228	2.7573	7.979	3.1018	0.9266	82.6381	0	9.5685	0	2.8841	3.8095	0									JB	59.3235	0	3.61883	7.5589	7.9293	5.2445	10.3869	71.8306	0	8.1427	4.8299	4.6123	3.1468	5.34781	72.2194
	T2	#DIV/0!	#DIV/0!	WE	64.4346	4.2742	1.80621	10.6264	7.7508	3.8678	1.2611	81.5621	0.4106	2.6228	2.7573	7.979	3.1018	0.9266	82.6381	0	9.5685	0	2.8841	3.8095	0									JB	59.3235	0	3.61883	7.5589	7.9293	5.2445	10.3869	71.8306	0	8.1427	4.8299	4.6123	3.1468	5.34781	72.2194
	T3	243	#DIV/0!	WE	64.4346	4.2742	1.80621	10.6264	7.7508	3.8678	1.2611	81.5621	0.4106	2.6228	2.7573	7.979	3.1018	0.9266	82.6381	0	9.5685	0	2.8841	3.8095	0									JB	59.3235	0	3.61883	7.5589	7.9293	5.2445	10.3869	71.8306	0	8.1427	4.8299	4.6123	3.1468	5.34781	72.2194
WY	T1	317.833	2455	WY	3.5387	1.2448	1.036	37.9874	6.2955	29.6897	15.6403	4.1524	0	2.3311	41.7515	4.4709	31.8665	13.0636	8.227	0	9.3252	45.6851	2.6505	20.8008	10.0307									JB	59.3235	0	3.61883	7.5589	7.9293	5.2445	10.3869	71.8306	0	8.1427	4.8299	4.6123	3.1468	5.34781	72.2194
	T2	417.333	2833.67	WY	3.5387	1.2448	1.036	37.9874	6.2955	29.6897	15.6403	4.1524	0	2.3311	41.7515	4.4709	31.8665	13.0636	8.227	0	9.3252	45.6851	2.6505	20.8008	10.0307									JB	59.3235	0	3.61883	7.5589	7.9293	5.2445	10.3869	71.8306	0	8.1427	4.8299	4.6123	3.1468	5.34781	72.2194
	T3	407.333	1793.5	WY	3.5387	1.2448	1.036	37.9874	6.2955	29.6897	15.6403	4.1524	0	2.3311	41.7515	4.4709	31.8665	13.0636	8.227	0	9.3252	45.6851	2.6505	20.8008	10.0307									JB	59.3235	0	3.61883	7.5589	7.9293	5.2445	10.3869	71.8306	0	8.1427	4.8299	4.6123	3.1468	5.34781	72.2194
																																		KG	30.8802	3.9384	3.73433	18.8311	15.8494	11.4232	6.4153	32.4866	4.6461	7.5984	13.6856	18.9425	8.4722	7.78832	55.7656
																																		KG	30.8802	3.9384	3.73433	18.8311	15.8494	11.4232	6.4153	32.4866	4.6461	7.5984	13.6856	18.9425	8.4722	7.78832	55.7656
																																		KG	30.8802	3.9384	3.73433	18.8311	15.8494	11.4232	6.4153	32.4866	4.6461	7.5984	13.6856	18.9425	8.4722	7.78832	55.7656
																																		KG	30.8802	3.9384	3.73433	18.8311	15.8494	11.4232	6.4153	32.4866	4.6461	7.5984	13.6856	18.9425	8.4722	7.78832	55.7656
																																		KG	30.8802	3.9384	3.73433	18.8311	15.8494	11.4232	6.4153	32.4866	4.6461	7.5984	13.6856	18.9425	8.4722	7.78832	55.7656
																																		KG	30.8802	3.9384	3.73433	18.8311	15.8494	11.4232	6.4153	32.4866	4.6461	7.5984	13.6856	18.9425	8.4722	7.78832	55.7656
																																		KG	30.8802	3.9384	3.73433	18.8311	15.8494	11.4232	6.4153	32.4866	4.6461	7.5984	13.6856	18.9425	8.4722	7.78832	55.7656
																																		KG	30.8802	3.9384	3.73433	18.8311	15.8494	11.4232	6.4153	32.4866	4.6461	7.5984	13.6856	18.9425	8.4722	7.78832	55.7656
																																		KG	30.8802	3.9384	3.73433	18.8311	15.8494	11.4232	6.4153	32.4866	4.6461	7.5984	13.6856	18.9425	8.4722	7.78832	55.7656
																																		PK	8.7239	5.5492	0.446	40.2614	15.2171	10.8967	11.3807	14.0141	6.4137	1.0031	31.1499	16.2132	16.8478	8.88492	21.852
																																		PK	8.7239	5.5492	0.446	40.2614	15.2171	10.8967	11.3807	14.0141	6.4137	1.0031	31.1499	16.2132	16.8478	8.88492	21.852
																																		PK	8.7239	5.5492	0.446	40.2614	15.2171	10.8967	11.3807	14.0141	6.4137	1.0031	31.1499	16.2132	16.8478	8.88492	21.852
																																		PK	8.7239	5.5492	0.446	40.2614	15.2171	10.8967	11.3807	14.0141	6.4137	1.0031	31.1499	16.2132	16.8478	8.88492	21.852
																																		PK	8.7239	5.5492	0.446	40.2614	15.2171	10.8967	11.3807	14.0141	6.4137	1.0031	31.1499	16.2132	16.8478	8.88492	21.852
																																		PK	8.7239	5.5492	0.446	40.2614	15.2171	10.8967	11.3807	14.0141	6.4137	1.0031	31.1499	16.2132	16.8478	8.88492	21.852
																																		RC	20.4633	2.0867	2.25475	33.376	8.6755	6.2059	14.6015	18.1023	2.5486	4.2218	31.4599	11.4246	5.9511	16.7963	8.427
																																		RC	20.4633	2.0867	2.25475	33.376	8.6755	6.2059	14.6015	18.1023	2.5486	4.2218	31.4599	11.4246	5.9511	16.7963	8.427
																																		RC	20.4633	2.0867	2.25475	33.376	8.6755	6.2059	14.6015	18.1023	2.5486	4.2218	31.4599	11.4246	5.9511	16.7963	8.427
																																		RC	20.4633	2.0867	2.25475	33.376	8.6755	6.2059	14.6015	18.1023	2.5486	4.2218	31.4599	11.4246	5.9511	16.7963	8.427
																																		RC	20.4633	2.0867	2.25475	33.376	8.6755	6.2059	14.6015	18.1023	2.5486	4.2218	31.4599	11.4246	5.9511	16.7963	8.427
																																		RC	20.4633	2.0867	2.25475	33.376	8.6755	6.2059	14.6015	18.1023	2.5486	4.2218	31.4599	11.4246	5.9511	16.7963	8.427
																																		RC	20.4633	2.0867	2.25475	33.376	8.6755	6.2059	14.6015	18.1023	2.5486	4.2218	31.4599	11.4246	5.9511	16.7963	8.427
																																		RC	20.4633	2.0867	2.25475	33.376	8.6755	6.2059	14.6015	18.1023	2.5486	4.2218	31.4599	11.4246	5.9511	16.7963	8.427
																																		RC	20.4633	2.0867	2.25475	33.376	8.6755	6.2059	14.6015	18.1023	2.5486	4.2218	31.4599	11.4246	5.9511	16.7963	8.427
																																		ST	27.2706	5.5614	3.31853	31.272	14.1576	5.4357	3.3612	27.3105	5.3376	5.6465	34.0616	14.0324	5.4288	6.3468	24.8514
																																		ST	27.2706	5.5614	3.31853	31.272	14.1576	5.4357	3.3612	27.3105	5.3376	5.6465	34.0616	14.0324	5.4288	6.3468	24.8514
																																		ST	27.2706	5.5614	3.31853	31.272	14.1576	5.4357	3.3612	27.3105	5.3376	5.6465	34.0616	14.0324	5.4288	6.3468	24.8514
																																		ST	27.2706	5.5614	3.31853	31.272	14.1576	5.4357	3.3612	27.3105	5.3376	5.6465	34.0616	14.0324	5.4288	6.3468	24.8514
																																		ST	27.2706	5.5614	3.31853	31.272	14.1576	5.4357	3.3612	27.3105	5.3376	5.6465	34.0616	14.0324	5.4288	6.3468	24.8514
																																		ST	27.2706	5.5614	3.31853	31.272	14.1576	5.4357	3.3612	27.3105	5.3376	5.6465	34.0616	14.0324	5.4288	6.3468	24.8514
																																		ST	27.2706	5.5614	3.31853	31.272	14.1576	5.4357	3.3612	27.3105	5.3376	5.6465	34.0616	14.0324	5.4288	6.3468	24.8514
																																		ST	27.2706	5.5614	3.31853	31.272	14.1576	5.4357	3.3612	27.3105	5.3376	5.6465	34.0616	14.0324	5.4288	6.3468	24.8514
																																		ST	27.2706	5.5614	3.31853	31.272	14.1576	5.4357	3.3612	27.3105	5.3376	5.6465	34.0616	14.0324	5.4288	6.3468	24.8514
																																		TG	27.2706	5.5614	3.31853	31.272	14.1576	5.4357	3.3612	27.3105	5.3376	5.6465	34.0616	14.0324	5.4288	6.3468	24.8514
																																		TG	46.5542	12.1091	0.6506	21.9785	3.0833	7.4129	3.4339	49.2866	15.3168	1.4639	19.376	1.6987	9.2203	1.8164	45.3673
																																		TG	46.5542	12.1091	0.6506	21.9785	3.0833	7.4129	3.4339	49.2866	15.3168	1.4639	19.376	1.6987	9.2203	1.8164	45.3673
																																		TG	46.5542	12.1091	0.6506	21.9785	3.0833	7.4129	3.4339	49.2866	15.3168	1.4639	19.376	1.6987	9.2203	1.8164	45.3673
																																		TG	46.5542	12.1091	0.6506	21.9785	3.0833	7.4129	3.4339	49.2866	15.3168	1.4639	19.376	1.6987	9.2203	1.8164	45.3673
																																		TG	46.5542	12.1091	0.6506	21.9785	3.0833	7.4129	3.4339	49.2866	15.3168	1.4639	19.376	1.6987	9.2203	1.8164	45.3673
																																		TG	46.5542	12.1091	0.6506	21.9785	3.0833	7.4129	3.4339	49.2866	15.3168	1.4639	19.376	1.6987	9.2203	1.8164	45.3673
																																		TG	46.5542	12.1091	0.6506	21.9785	3.0833	7.4129	3.4339	49.2866	15.3168	1.4639	19.376	1.6987	9.2203	1.8164	45.3673
																																		TG	46.5542	12.1091	0.6506	21.9785	3.0833	7.4129	3.4339	49.2866	15.3168	1.4639	19.376	1.6987	9.2203	1.8164	45.3673
																																		TP	29.7067	3.9973	1.69967	38.1094	7.9003	7.5998	3.876	35.1232	5.7937	3.7603	34.9998	6.1102	8.0368	4.2889	53.4416
																																		TP	29.7067	3.9973	1.69967	38.1094	7.9003	7.5998	3.876	35.1232	5.7937	3.7603	34.9998	6.1102	8.0368	4.2889	53.4416
																																		TP	29.7067	3.9973	1.69967	38.1094	7.9003	7.5998	3.876	35.1232	5.7937	3.7603	34.9998	6.1102	8.0368	4.2889	53.4416
																																		TP	29.7067	3.9973	1.69967	38.1094	7.9003	7.5998	3.876	35.1232	5.7937	3.7603	34.9998	6.1102	8.0368	4.2889	53.4416
																																		TP	29.7067	3.9973	1.69967	38.1094	7.9003	7.5998	3.876	35.1232	5.7937	3.7603	34.9998	6.1102	8.0368	4.2889	53.4416
																																		TP	29.7067	3.9973	1.69967	38.1094	7.9003	7.5998	3.876	35.1232	5.7937	3.7603	34.9998	6.1102	8.0368	4.2889	53.4416
																																		TP	29.7067	3.9973	1.69967	38.1094	7.9003	7.5998	3.876	35.1232	5.7937	3.7603	34.9998	6.1102	8.0368	4.2889	53.4416
																																		TP	29.7067	3.9973	1.69967	38.1094	7.9003	7.5998	3.876	35.1232	5.7937	3.7603	34.9998	6.1102	8.0368	4.2889	53.4416
																																		TP	29.7067	3.9973	1.69967	38.1094	7.9003	7.5998	3.876	35.1232	5.7937	3.7603	34.9998	6.1102	8.0368	4.2889	53.4416
																																		WE	64.4346	4.2742	1.80621	10.6264	7.7508	3.8678	1.2611	81.5621	0.4106	2.6228	2.7573	7.979	3.1018	0.9266	82.6381
																																		WE	64.4346	4.2742	1.80621	10.6264	7.7508	3.8678	1.2611	81.5621	0.4106	2.6228	2.7573	7.979	3.1018	0.9266	82.6381
																																		WE	64.4346	4.2742	1.80621	10.6264	7.7508	3.8678	1.2611	81.5621	0.4106	2.6228	2.7573	7.979	3.1018	0.9266	82.6381
																																		WE	64.4346	4.2742	1.80621	10.6264	7.7508	3.8678	1.2611	81.5621	0.4106	2.6228	2.7573	7.979	3.1018	0.9266	82.6381
																																		WE	64.4346	4.2742	1.80621	10.6264	7.7508	3.8678	1.2611	81.5621	0.4106	2.6228	2.7573	7.979	3.1018	0.9266	82.6381
																																		WE	64.4346	4.2742	1.80621	10.6264	7.7508	3.8678	1.2611	81.5621	0.4106	2.6228	2.7573	7.979	3.1018	0.9266	82.6381
																																		WE	64.4346	4.2742	1.80621	10.6264	7.7508	3.8678	1.2611	81.5621	0.4106	2.6228	2.7573	7.979	3.1018	0.9266	82.6381
																																		WE	64.4346	4.2742	1.80621	10.6264	7.7508	3.8678	1.2611	81.5621	0.4106	2.6228	2.7573	7.979	3.1018	0.9266	82.6381
																																		WE	64.4346	4.2742	1.80621	10.6264	7.7508	3.8678	1.2611	81.5621	0.4106	2.6228	2.7573	7.979	3.1018	0.9266	82.6381
																																		WY	3.5387	1.2448	1.036	37.9874	6.2955	29.6897	15.6403	4.1524	0	2.3311	41.7515	4.4709	31.8665	13.0636	8.227
																																		WY	3.5387	1.2448	1.036	37.9874	6.2955	29.6897	15.6403	4.1524	0	2.3311	41.7515	4.4709	31.8665	13.0636	8.227
																																		WY	3.5387	1.2448	1.036	37.9874	6.2955	29.6897	15.6403	4.1524	0	2.3311	41.7515	4.4709	31.8665	13.0636	8.227
																																		WY	3.5387	1.2448	1.036	37.9874	6.2955	29.6897	15.6403	4.1524	0	2.3311	41.7515	4.4709	31.8665	13.0636	8.227
																																		WY	3.5387	1.2448	1.036	37.9874	6.2955	29.6897	15.6403	4.1524	0	2.3311	41.7515	4.4709	31.8665	13.0636	8.227
																																		WY	3.5387	1.2448	1.036	37.9874	6.2955	29.6897	15.6403	4.1524	0	2.3311	41.7515	4.4709	31.8665	13.0636	8.227
																																		WY	3.5387	1.2448	1.036	37.9874	6.2955	29.6897	15.6403	4.1524	0	2.3311	41.7515	4.4709	31.8665	13.0636	8.227
																																		WY	3.5387	1.2448	1.036	37.9874	6.2955	29.6897	15.6403	4.1524	0	2.3311	41.7515	4.4709	31.8665	13.0636	8.227
																																		WY	3.5387	1.2448	1.036	37.9874	6.2955	29.6897	15.6403	4.1524	0	2.3311	41.7515	4.4709	31.8665	13.0636	8.227
[truncated: 6 more columns]

## Sheet: T3 Pollen
Site	Time	Seed	Pollen	pctfield1500	pctforage1500	pctfruitveg1500	pctforest1500	pctgrassland1500	pcturban1500	pctturf1500	pctfield1000	pctforage1000	pctfruitveg1000	pctforest1000	pctgrassland1000	pcturban1000	pctturf1000	pctfield500	pctforage500	pctfruitveg500	pctforest500	pctgrassland500	pcturban500	pctturf500
BA	T3	554.833	808	41.2555	5.0688	7.66997	15.7269	7.5705	6.882	6.2746	28.3133	5.8634	17.2198	16.7993	8.6928	9.3638	5.6097	29.2243	3.051	28.4905	21.0031	7.974	5.65	2.5287									BA	41.2555	5.0688	7.66997	15.7269	7.5705	6.882	6.2746	28.3133	5.8634	17.2198	16.7993	8.6928	9.3638	5.6097	29.2243	3.051
FW	T3	511.667	1833.67	41.0211	5.2859	0.44248	11.5864	17.0939	6.5847	2.7243	37.5512	8.9046	0.9956	7.9193	20.9331	10.2708	2.21875	19.5337	6.0853	2.3718	10.3248	36.981	19.6256	1.5897				BA	41.2555	5.0688	7.66997	15.7269	7.5705	6.882	6.2746	28.3133	5.8634	17.2198	16.7993	8.6928	9.3638	5.6097	29.2243	3.051	28.4905	21.0031	7.974	5.65	2.5287
JB	T3	122.667	1313	59.3235	0	3.61883	7.5589	7.9293	5.2445	10.3869	71.8306	0	8.1427	4.8299	4.6123	3.1468	5.34781	72.2194	0	21.3525	1.6168	0.0608	0	0
KG	T3	355.333	2527.67	30.8802	3.9384	3.73433	18.8311	15.8494	11.4232	6.4153	32.4866	4.6461	7.5984	13.6856	18.9425	8.4722	7.78832	55.7656	0.6391	3.711	5.7151	20.7782	5.0854	1.5471									FN	24.1611	0.9939	5.2457	31.4731	11.9663	4.235	2.8433	25.7831	2.2362	11.8036	35.2374	9.7022	5.8469	2.4698	13.3118	8.9085
RC	T3	614.333	1998.33	20.4633	2.0867	2.25475	33.376	8.6755	6.2059	14.6015	18.1023	2.5486	4.2218	31.4599	11.4246	5.9511	16.7963	8.427	0	9.819	36.1858	11.0197	7.6474	10.9364									FW	41.0211	5.2859	0.44248	11.5864	17.0939	6.5847	2.7243	37.5512	8.9046	0.9956	7.9193	20.9331	10.2708	2.21875	19.5337	6.0853
ST	T3	409.667	2603.67	27.2706	5.5614	3.31853	31.272	14.1576	5.4357	3.3612	27.3105	5.3376	5.6465	34.0616	14.0324	5.4288	6.3468	24.8514	4.5811	20.4593	30.0297	17.9609	1.9219	0.0207									FW	41.0211	5.2859	0.44248	11.5864	17.0939	6.5847	2.7243	37.5512	8.9046	0.9956	7.9193	20.9331	10.2708	2.21875	19.5337	6.0853
TG	T3	302.333	1418.33	46.5542	12.1091	0.6506	21.9785	3.0833	7.4129	3.4339	49.2866	15.3168	1.4639	19.376	1.6987	9.2203	1.8164	45.3673	21.8332	5.8564	14.994	0.9221	7.5704	3.456									FW	41.0211	5.2859	0.44248	11.5864	17.0939	6.5847	2.7243	37.5512	8.9046	0.9956	7.9193	20.9331	10.2708	2.21875	19.5337	6.0853
TP	T3	453.667	923	29.7067	3.9973	1.69967	38.1094	7.9003	7.5998	3.876	35.1232	5.7937	3.7603	34.9998	6.1102	8.0368	4.2889	53.4416	0.9328	1.1457	34.6991	1.1792	2.6977	4.0106
WY	T3	407.333	1793.5	3.5387	1.2448	1.036	37.9874	6.2955	29.6897	15.6403	4.1524	0	2.3311	41.7515	4.4709	31.8665	13.0636	8.227	0	9.3252	45.6851	2.6505	20.8008	10.0307									JB	59.3235	0	3.61883	7.5589	7.9293	5.2445	10.3869	71.8306	0	8.1427	4.8299	4.6123	3.1468	5.34781	72.2194	0
																																	KG	30.8802	3.9384	3.73433	18.8311	15.8494	11.4232	6.4153	32.4866	4.6461	7.5984	13.6856	18.9425	8.4722	7.78832	55.7656	0.6391
																																	KG	30.8802	3.9384	3.73433	18.8311	15.8494	11.4232	6.4153	32.4866	4.6461	7.5984	13.6856	18.9425	8.4722	7.78832	55.7656	0.6391
																																	KG	30.8802	3.9384	3.73433	18.8311	15.8494	11.4232	6.4153	32.4866	4.6461	7.5984	13.6856	18.9425	8.4722	7.78832	55.7656	0.6391
																																	KG	30.8802	3.9384	3.73433	18.8311	15.8494	11.4232	6.4153	32.4866	4.6461	7.5984	13.6856	18.9425	8.4722	7.78832	55.7656	0.6391
																																	KG	30.8802	3.9384	3.73433	18.8311	15.8494	11.4232	6.4153	32.4866	4.6461	7.5984	13.6856	18.9425	8.4722	7.78832	55.7656	0.6391
																																	KG	30.8802	3.9384	3.73433	18.8311	15.8494	11.4232	6.4153	32.4866	4.6461	7.5984	13.6856	18.9425	8.4722	7.78832	55.7656	0.6391
																																	KG	30.8802	3.9384	3.73433	18.8311	15.8494	11.4232	6.4153	32.4866	4.6461	7.5984	13.6856	18.9425	8.4722	7.78832	55.7656	0.6391
																																	KG	30.8802	3.9384	3.73433	18.8311	15.8494	11.4232	6.4153	32.4866	4.6461	7.5984	13.6856	18.9425	8.4722	7.78832	55.7656	0.6391
																																	KG	30.8802	3.9384	3.73433	18.8311	15.8494	11.4232	6.4153	32.4866	4.6461	7.5984	13.6856	18.9425	8.4722	7.78832	55.7656	0.6391
																																	PK	8.7239	5.5492	0.446	40.2614	15.2171	10.8967	11.3807	14.0141	6.4137	1.0031	31.1499	16.2132	16.8478	8.88492	21.852	7.5821
																																	PK	8.7239	5.5492	0.446	40.2614	15.2171	10.8967	11.3807	14.0141	6.4137	1.0031	31.1499	16.2132	16.8478	8.88492	21.852	7.5821
																																	PK	8.7239	5.5492	0.446	40.2614	15.2171	10.8967	11.3807	14.0141	6.4137	1.0031	31.1499	16.2132	16.8478	8.88492	21.852	7.5821
																																	PK	8.7239	5.5492	0.446	40.2614	15.2171	10.8967	11.3807	14.0141	6.4137	1.0031	31.1499	16.2132	16.8478	8.88492	21.852	7.5821
																																	PK	8.7239	5.5492	0.446	40.2614	15.2171	10.8967	11.3807	14.0141	6.4137	1.0031	31.1499	16.2132	16.8478	8.88492	21.852	7.5821
																																	PK	8.7239	5.5492	0.446	40.2614	15.2171	10.8967	11.3807	14.0141	6.4137	1.0031	31.1499	16.2132	16.8478	8.88492	21.852	7.5821
																																	RC	20.4633	2.0867	2.25475	33.376	8.6755	6.2059	14.6015	18.1023	2.5486	4.2218	31.4599	11.4246	5.9511	16.7963	8.427	0
																																	RC	20.4633	2.0867	2.25475	33.376	8.6755	6.2059	14.6015	18.1023	2.5486	4.2218	31.4599	11.4246	5.9511	16.7963	8.427	0
																																	RC	20.4633	2.0867	2.25475	33.376	8.6755	6.2059	14.6015	18.1023	2.5486	4.2218	31.4599	11.4246	5.9511	16.7963	8.427	0
																																	RC	20.4633	2.0867	2.25475	33.376	8.6755	6.2059	14.6015	18.1023	2.5486	4.2218	31.4599	11.4246	5.9511	16.7963	8.427	0
																																	RC	20.4633	2.0867	2.25475	33.376	8.6755	6.2059	14.6015	18.1023	2.5486	4.2218	31.4599	11.4246	5.9511	16.7963	8.427	0
																																	RC	20.4633	2.0867	2.25475	33.376	8.6755	6.2059	14.6015	18.1023	2.5486	4.2218	31.4599	11.4246	5.9511	16.7963	8.427	0
																																	RC	20.4633	2.0867	2.25475	33.376	8.6755	6.2059	14.6015	18.1023	2.5486	4.2218	31.4599	11.4246	5.9511	16.7963	8.427	0
																																	RC	20.4633	2.0867	2.25475	33.376	8.6755	6.2059	14.6015	18.1023	2.5486	4.2218	31.4599	11.4246	5.9511	16.7963	8.427	0
																																	RC	20.4633	2.0867	2.25475	33.376	8.6755	6.2059	14.6015	18.1023	2.5486	4.2218	31.4599	11.4246	5.9511	16.7963	8.427	0
																																	ST	27.2706	5.5614	3.31853	31.272	14.1576	5.4357	3.3612	27.3105	5.3376	5.6465	34.0616	14.0324	5.4288	6.3468	24.8514	4.5811
																																	ST	27.2706	5.5614	3.31853	31.272	14.1576	5.4357	3.3612	27.3105	5.3376	5.6465	34.0616	14.0324	5.4288	6.3468	24.8514	4.5811
																																	ST	27.2706	5.5614	3.31853	31.272	14.1576	5.4357	3.3612	27.3105	5.3376	5.6465	34.0616	14.0324	5.4288	6.3468	24.8514	4.5811
																																	ST	27.2706	5.5614	3.31853	31.272	14.1576	5.4357	3.3612	27.3105	5.3376	5.6465	34.0616	14.0324	5.4288	6.3468	24.8514	4.5811
																																	ST	27.2706	5.5614	3.31853	31.272	14.1576	5.4357	3.3612	27.3105	5.3376	5.6465	34.0616	14.0324	5.4288	6.3468	24.8514	4.5811
																																	ST	27.2706	5.5614	3.31853	31.272	14.1576	5.4357	3.3612	27.3105	5.3376	5.6465	34.0616	14.0324	5.4288	6.3468	24.8514	4.5811
																																	ST	27.2706	5.5614	3.31853	31.272	14.1576	5.4357	3.3612	27.3105	5.3376	5.6465	34.0616	14.0324	5.4288	6.3468	24.8514	4.5811
																																	ST	27.2706	5.5614	3.31853	31.272	14.1576	5.4357	3.3612	27.3105	5.3376	5.6465	34.0616	14.0324	5.4288	6.3468	24.8514	4.5811
																																	ST	27.2706	5.5614	3.31853	31.272	14.1576	5.4357	3.3612	27.3105	5.3376	5.6465	34.0616	14.0324	5.4288	6.3468	24.8514	4.5811
																																	TG	27.2706	5.5614	3.31853	31.272	14.1576	5.4357	3.3612	27.3105	5.3376	5.6465	34.0616	14.0324	5.4288	6.3468	24.8514	4.5811
																																	TG	46.5542	12.1091	0.6506	21.9785	3.0833	7.4129	3.4339	49.2866	15.3168	1.4639	19.376	1.6987	9.2203	1.8164	45.3673	21.8332
																																	TG	46.5542	12.1091	0.6506	21.9785	3.0833	7.4129	3.4339	49.2866	15.3168	1.4639	19.376	1.6987	9.2203	1.8164	45.3673	21.8332
																																	TG	46.5542	12.1091	0.6506	21.9785	3.0833	7.4129	3.4339	49.2866	15.3168	1.4639	19.376	1.6987	9.2203	1.8164	45.3673	21.8332
																																	TG	46.5542	12.1091	0.6506	21.9785	3.0833	7.4129	3.4339	49.2866	15.3168	1.4639	19.376	1.6987	9.2203	1.8164	45.3673	21.8332
																																	TG	46.5542	12.1091	0.6506	21.9785	3.0833	7.4129	3.4339	49.2866	15.3168	1.4639	19.376	1.6987	9.2203	1.8164	45.3673	21.8332
																																	TG	46.5542	12.1091	0.6506	21.9785	3.0833	7.4129	3.4339	49.2866	15.3168	1.4639	19.376	1.6987	9.2203	1.8164	45.3673	21.8332
																																	TG	46.5542	12.1091	0.6506	21.9785	3.0833	7.4129	3.4339	49.2866	15.3168	1.4639	19.376	1.6987	9.2203	1.8164	45.3673	21.8332
																																	TG	46.5542	12.1091	0.6506	21.9785	3.0833	7.4129	3.4339	49.2866	15.3168	1.4639	19.376	1.6987	9.2203	1.8164	45.3673	21.8332
																																	TP	29.7067	3.9973	1.69967	38.1094	7.9003	7.5998	3.876	35.1232	5.7937	3.7603	34.9998	6.1102	8.0368	4.2889	53.4416	0.9328
																																	TP	29.7067	3.9973	1.69967	38.1094	7.9003	7.5998	3.876	35.1232	5.7937	3.7603	34.9998	6.1102	8.0368	4.2889	53.4416	0.9328
																																	TP	29.7067	3.9973	1.69967	38.1094	7.9003	7.5998	3.876	35.1232	5.7937	3.7603	34.9998	6.1102	8.0368	4.2889	53.4416	0.9328
																																	TP	29.7067	3.9973	1.69967	38.1094	7.9003	7.5998	3.876	35.1232	5.7937	3.7603	34.9998	6.1102	8.0368	4.2889	53.4416	0.9328
																																	TP	29.7067	3.9973	1.69967	38.1094	7.9003	7.5998	3.876	35.1232	5.7937	3.7603	34.9998	6.1102	8.0368	4.2889	53.4416	0.9328
																																	TP	29.7067	3.9973	1.69967	38.1094	7.9003	7.5998	3.876	35.1232	5.7937	3.7603	34.9998	6.1102	8.0368	4.2889	53.4416	0.9328
																																	TP	29.7067	3.9973	1.69967	38.1094	7.9003	7.5998	3.876	35.1232	5.7937	3.7603	34.9998	6.1102	8.0368	4.2889	53.4416	0.9328
																																	TP	29.7067	3.9973	1.69967	38.1094	7.9003	7.5998	3.876	35.1232	5.7937	3.7603	34.9998	6.1102	8.0368	4.2889	53.4416	0.9328
																																	TP	29.7067	3.9973	1.69967	38.1094	7.9003	7.5998	3.876	35.1232	5.7937	3.7603	34.9998	6.1102	8.0368	4.2889	53.4416	0.9328
																																	WE	64.4346	4.2742	1.80621	10.6264	7.7508	3.8678	1.2611	81.5621	0.4106	2.6228	2.7573	7.979	3.1018	0.9266	82.6381	0
																																	WE	64.4346	4.2742	1.80621	10.6264	7.7508	3.8678	1.2611	81.5621	0.4106	2.6228	2.7573	7.979	3.1018	0.9266	82.6381	0
																																	WE	64.4346	4.2742	1.80621	10.6264	7.7508	3.8678	1.2611	81.5621	0.4106	2.6228	2.7573	7.979	3.1018	0.9266	82.6381	0
																																	WE	64.4346	4.2742	1.80621	10.6264	7.7508	3.8678	1.2611	81.5621	0.4106	2.6228	2.7573	7.979	3.1018	0.9266	82.6381	0
																																	WE	64.4346	4.2742	1.80621	10.6264	7.7508	3.8678	1.2611	81.5621	0.4106	2.6228	2.7573	7.979	3.1018	0.9266	82.6381	0
																																	WE	64.4346	4.2742	1.80621	10.6264	7.7508	3.8678	1.2611	81.5621	0.4106	2.6228	2.7573	7.979	3.1018	0.9266	82.6381	0
																																	WE	64.4346	4.2742	1.80621	10.6264	7.7508	3.8678	1.2611	81.5621	0.4106	2.6228	2.7573	7.979	3.1018	0.9266	82.6381	0
																																	WE	64.4346	4.2742	1.80621	10.6264	7.7508	3.8678	1.2611	81.5621	0.4106	2.6228	2.7573	7.979	3.1018	0.9266	82.6381	0
																																	WE	64.4346	4.2742	1.80621	10.6264	7.7508	3.8678	1.2611	81.5621	0.4106	2.6228	2.7573	7.979	3.1018	0.9266	82.6381	0
																																	WY	3.5387	1.2448	1.036	37.9874	6.2955	29.6897	15.6403	4.1524	0	2.3311	41.7515	4.4709	31.8665	13.0636	8.227	0
																																	WY	3.5387	1.2448	1.036	37.9874	6.2955	29.6897	15.6403	4.1524	0	2.3311	41.7515	4.4709	31.8665	13.0636	8.227	0
																																	WY	3.5387	1.2448	1.036	37.9874	6.2955	29.6897	15.6403	4.1524	0	2.3311	41.7515	4.4709	31.8665	13.0636	8.227	0
																																	WY	3.5387	1.2448	1.036	37.9874	6.2955	29.6897	15.6403	4.1524	0	2.3311	41.7515	4.4709	31.8665	13.0636	8.227	0
																																	WY	3.5387	1.2448	1.036	37.9874	6.2955	29.6897	15.6403	4.1524	0	2.3311	41.7515	4.4709	31.8665	13.0636	8.227	0
																																	WY	3.5387	1.2448	1.036	37.9874	6.2955	29.6897	15.6403	4.1524	0	2.3311	41.7515	4.4709	31.8665	13.0636	8.227	0
																																	WY	3.5387	1.2448	1.036	37.9874	6.2955	29.6897	15.6403	4.1524	0	2.3311	41.7515	4.4709	31.8665	13.0636	8.227	0
																																	WY	3.5387	1.2448	1.036	37.9874	6.2955	29.6897	15.6403	4.1524	0	2.3311	41.7515	4.4709	31.8665	13.0636	8.227	0
																																	WY	3.5387	1.2448	1.036	37.9874	6.2955	29.6897	15.6403	4.1524	0	2.3311	41.7515	4.4709	31.8665	13.0636	8.227	0
[truncated: 5 more columns]
